# Supplementary material for: Metabolomics-Guided Discovery of New Dimeric Xanthones from Co-Cultures of Mangrove Endophytic Fungi Phomopsis asparagi DHS-48 and Phomopsis sp. DHS-11
Source: MDPI journal article supplement (doi:10.3390/md22030102), 2024-02-23
Supplement: s1 [file s1]

## Electronic Supplementary Information

### **Metabolomics-Guided Discovery of New Dimeric Xanthonones from Co-cultures of Mangrove Endophytic Fungi *Phomopsis asparagi* DHS-48 and *Phomopsis* sp. DHS-11**

Jingwan Wu, Dandan Chen, Qing Li, Ting Feng, Jing Xu\*

Collaborative Innovation Center of Ecological Civilization, School of Chemistry and  
Chemical Engineering, Hainan University, Haikou 570228

\*To whom correspondence should be addressed.

Prof. Dr. Jing Xu, Tel.: ++86-898-6627-9226, Fax: ++86-898-6627-9010, E-mail:  
*happyjing3@hainan.edu.cn*

# Contents

|                                                                                                                                                                                      |    |
|--------------------------------------------------------------------------------------------------------------------------------------------------------------------------------------|----|
| <b>Figure S1.</b> $^1\text{H}$ -NMR of EtOAc extracts of <i>Phomopsis asparagi</i> DHS-48, <i>Phomopsis</i> sp. DHS-11 and their Co-culture measured in $\text{CD}_3\text{OD}$ ----- | 4  |
| <b>Figure S2.</b> PCA of metabolomics data of co-culture and their corresponding mono-cultures. 4                                                                                    |    |
| <b>Figure S3.</b> The MS/MS spectrum and possible fragmentation patterns of compound <b>5-9</b> and deacetylphomoxanthone B-----                                                     | 5  |
| <b>Figure S4.</b> The MS/MS spectrum and possible fragmentation patterns of compound <b>1-4</b> -----                                                                                | 6  |
| <b>Figure S5.</b> $^1\text{H}$ -NMR of <b>(1)</b> -----                                                                                                                              | 7  |
| <b>Figure S6.</b> $^{13}\text{C}$ -NMR of <b>(1)</b> -----                                                                                                                           | 7  |
| <b>Figure S7.</b> DEPT of <b>(1)</b> -----                                                                                                                                           | 8  |
| <b>Figure S8.</b> $^1\text{H}$ - $^1\text{H}$ COSY of <b>(1)</b> -----                                                                                                               | 8  |
| <b>Figure S9.</b> HSQC of <b>(1)</b> -----                                                                                                                                           | 9  |
| <b>Figure S10.</b> HMBC of <b>(1)</b> -----                                                                                                                                          | 9  |
| <b>Figure S11.</b> NOSEY of <b>(1)</b> -----                                                                                                                                         | 10 |
| <b>Figure S12.</b> HR-ESI-MS of <b>(1)</b> -----                                                                                                                                     | 10 |
| <b>Figure S13.</b> $^1\text{H}$ -NMR of <b>(2)</b> -----                                                                                                                             | 11 |
| <b>Figure S14.</b> $^{13}\text{C}$ -NMR of <b>(2)</b> -----                                                                                                                          | 11 |
| <b>Figure S15.</b> DEPT of <b>(2)</b> -----                                                                                                                                          | 12 |
| <b>Figure S16.</b> $^1\text{H}$ - $^1\text{H}$ COSY of <b>(2)</b> -----                                                                                                              | 12 |
| <b>Figure S17.</b> HSQC of <b>(2)</b> -----                                                                                                                                          | 13 |
| <b>Figure S18.</b> HMBC of <b>(2)</b> -----                                                                                                                                          | 13 |
| <b>Figure S19.</b> NOSEY of <b>(2)</b> -----                                                                                                                                         | 14 |
| <b>Figure S20.</b> HR-ESI-MS of <b>(2)</b> -----                                                                                                                                     | 14 |
| <b>Figure S21.</b> $^1\text{H}$ -NMR of <b>(3)</b> -----                                                                                                                             | 15 |
| <b>Figure S22.</b> $^{13}\text{C}$ -NMR of <b>(3)</b> -----                                                                                                                          | 15 |
| <b>Figure S23.</b> DEPT of <b>(3)</b> -----                                                                                                                                          | 16 |
| <b>Figure S24.</b> $^1\text{H}$ - $^1\text{H}$ COSY of <b>(3)</b> -----                                                                                                              | 16 |
| <b>Figure S25.</b> HSQC of <b>(3)</b> -----                                                                                                                                          | 17 |
| <b>Figure S26.</b> HMBC of <b>(3)</b> -----                                                                                                                                          | 17 |
| <b>Figure S27.</b> NOSEY of <b>(3)</b> -----                                                                                                                                         | 18 |
| <b>Figure S28.</b> HR-ESI-MS of <b>(3)</b> -----                                                                                                                                     | 18 |
| <b>Figure S29.</b> $^1\text{H}$ -NMR of <b>(4)</b> -----                                                                                                                             | 19 |
| <b>Figure S30.</b> $^{13}\text{C}$ -NMR of <b>(4)</b> -----                                                                                                                          | 19 |
| <b>Figure S31.</b> HR-ESI-MS of <b>(4)</b> -----                                                                                                                                     | 20 |
| <b>Figure S32.</b> $^1\text{H}$ -NMR of <b>(5)</b> -----                                                                                                                             | 20 |
| <b>Figure S33.</b> $^{13}\text{C}$ -NMR of <b>(5)</b> -----                                                                                                                          | 21 |

|                                                                                                                                                                                   |    |
|-----------------------------------------------------------------------------------------------------------------------------------------------------------------------------------|----|
| <b>Figure S34.</b> HR-ESI-MS of (5) -----                                                                                                                                         | 21 |
| <b>Figure S35.</b> <sup>1</sup> H-NMR of (6) -----                                                                                                                                | 22 |
| <b>Figure S36.</b> <sup>13</sup> C-NMR of (6) -----                                                                                                                               | 22 |
| <b>Figure S37.</b> HR-ESI-MS of (6) -----                                                                                                                                         | 23 |
| <b>Figure S38.</b> <sup>1</sup> H-NMR of (7) -----                                                                                                                                | 23 |
| <b>Figure S39.</b> <sup>13</sup> C-NMR of (7) -----                                                                                                                               | 24 |
| <b>Figure S40.</b> HR-ESI-MS of (7) -----                                                                                                                                         | 24 |
| <b>Figure S41.</b> <sup>1</sup> H-NMR of (8) -----                                                                                                                                | 25 |
| <b>Figure S42.</b> <sup>13</sup> C-NMR of (8) -----                                                                                                                               | 25 |
| <b>Figure S43.</b> HR-ESI-MS of (8) -----                                                                                                                                         | 26 |
| <b>Figure S44.</b> <sup>1</sup> H-NMR of (9) -----                                                                                                                                | 26 |
| <b>Figure S45.</b> <sup>13</sup> C-NMR of (9) -----                                                                                                                               | 27 |
| <b>Figure S46.</b> HR-ESI-MS of (9) -----                                                                                                                                         | 27 |
| <b>Figure S47.</b> HPLC spectrum for the purity of tested compounds -----                                                                                                         | 27 |
| <b>Table S1.</b> Putative annotation of metabolites produced in the non-cultures of <i>Phomopsis asparagi</i> DHS-48 and <i>Phomopsis</i> sp. DHS-11, and their co-culture. ----- | 32 |
| <b>Table S2.</b> Gibbs free energies <sup>a</sup> and equilibrium populations <sup>b</sup> of low-energy conformers of phomoxanthone L (1) -----                                  | 37 |
| <b>Table S3.</b> Cartesian coordinates for the low-energy reoptimized MMFF conformers of phomoxanthone L (1) at B3LYP/6-31G(d,p) level of theory in gas -----                     | 37 |
| <b>Table S4.</b> Gibbs free energies <sup>a</sup> and equilibrium populations <sup>b</sup> of low-energy conformers of phomoxanthone M (2) -----                                  | 45 |
| <b>Table S5.</b> Cartesian coordinates for the low-energy reoptimized MMFF conformers of phomoxanthone M (2) at B3LYP/6-31G(d,p) level of theory in gas -----                     | 45 |
| <b>Table S6.</b> Gibbs free energies <sup>a</sup> and equilibrium populations <sup>b</sup> of low-energy conformers of phomoxanthone N (3) -----                                  | 52 |
| <b>Table S7.</b> Cartesian coordinates for the low-energy reoptimized MMFF conformers of phomoxanthone N (3) at B3LYP/6-31G(d,p) level of theory in gas -----                     | 51 |

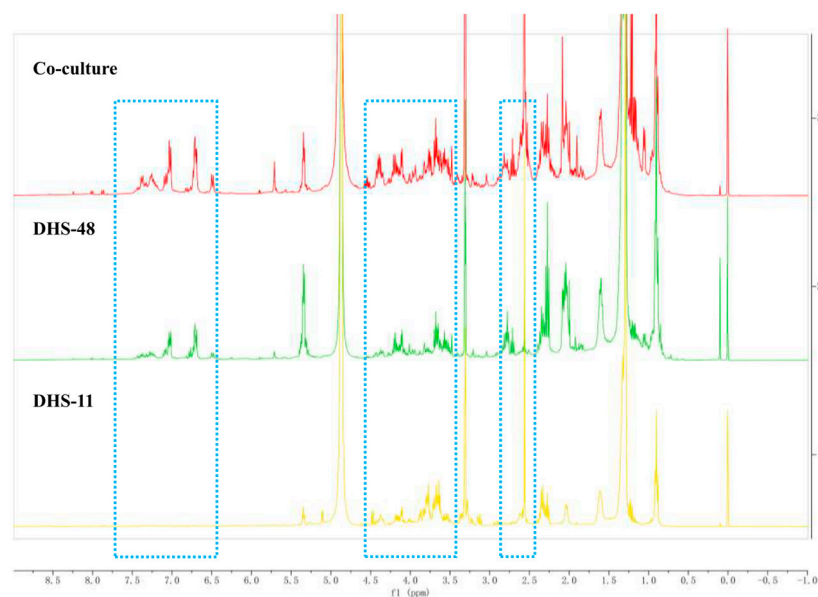

**Figure S1.**  $^1\text{H}$  NMR spectra of EtOAc extracts of *Phomopsis asparagi* DHS-48, *Phomopsis* sp. DHS-11 and their Co-culture measured in  $\text{CD}_3\text{OD}$  at 400 MHz, chemical shifts ( $\delta$ ) presented in ppm.

**Figure S2.** PCA of metabolomics data of co-culture and their corresponding mono-cultures, (A) the score plots and (B) the loading plots. The data analyzed by LC-IT-TOF-MS in the positive mode (612 features). The parameters ( $R^2$  and  $Q^2$ ) of the score plots demonstrated the discriminative ability of this model. The scattered dots labeled with  $m/z$  in B were representative features mentioned in the results section.

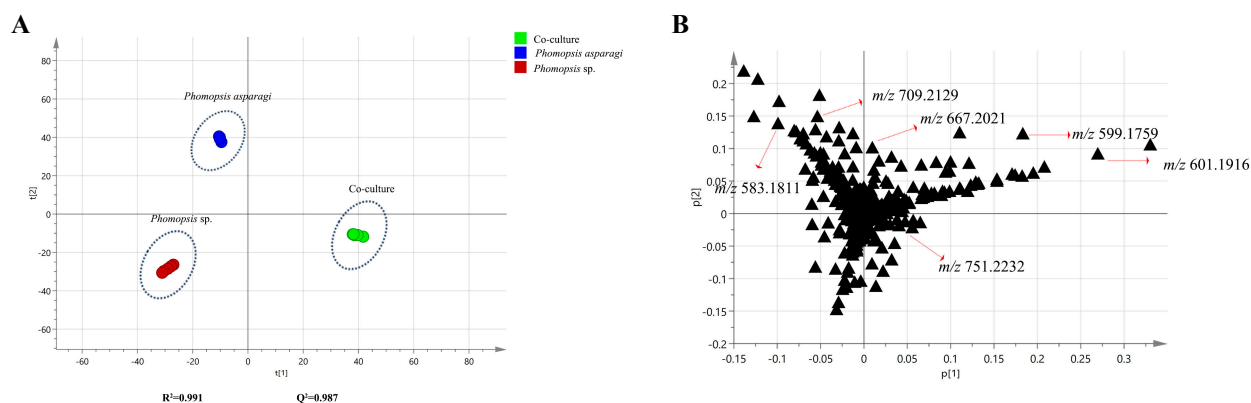



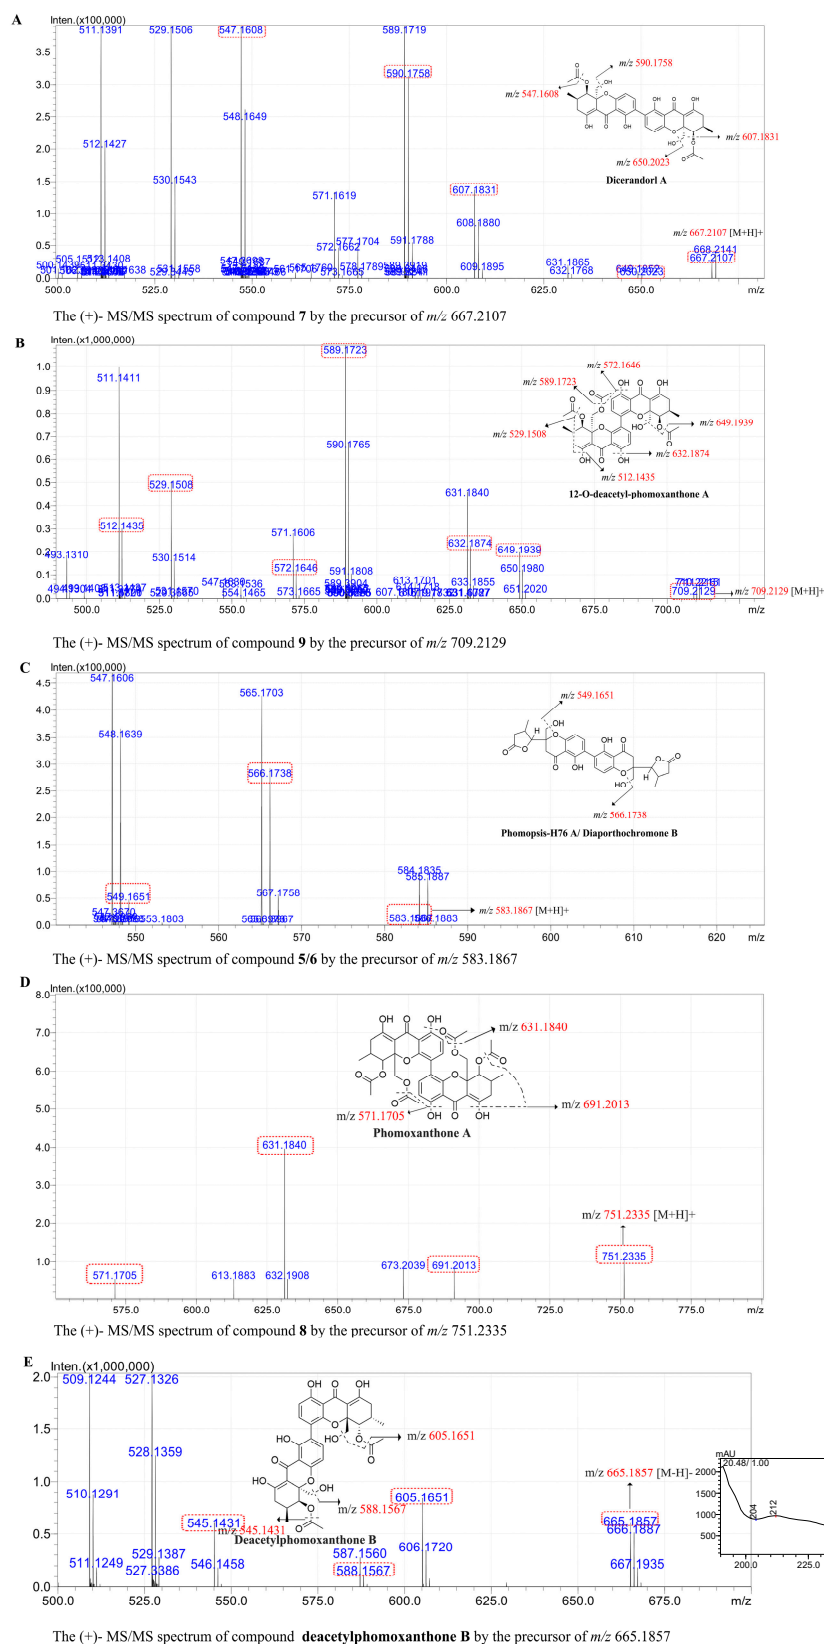

**Figure S3.** The MS/MS spectrum and possible fragmentation patterns of compound **5-9** and deacetylphomoxanthone **B**

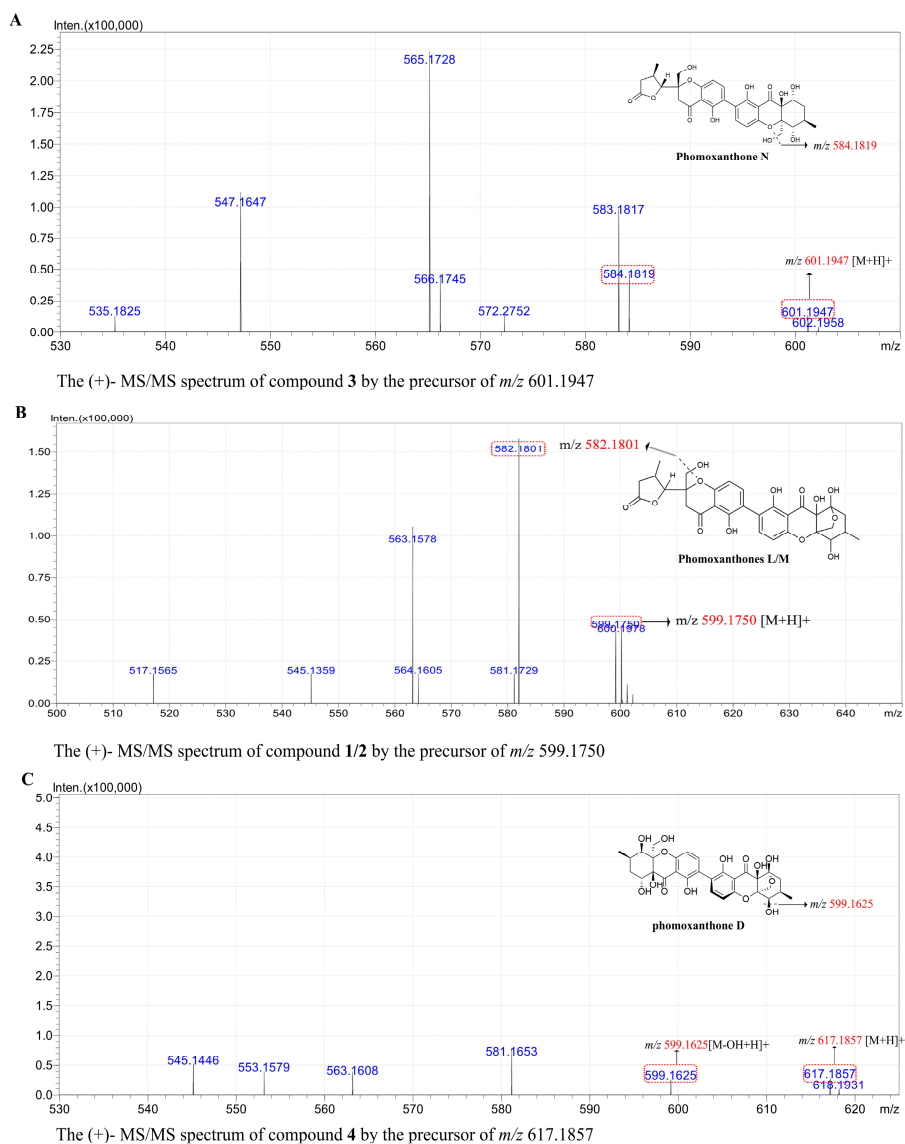

**Figure S4.** The MS/MS spectrum and possible fragmentation patterns of compound **1**, **2**, **3** and **4**

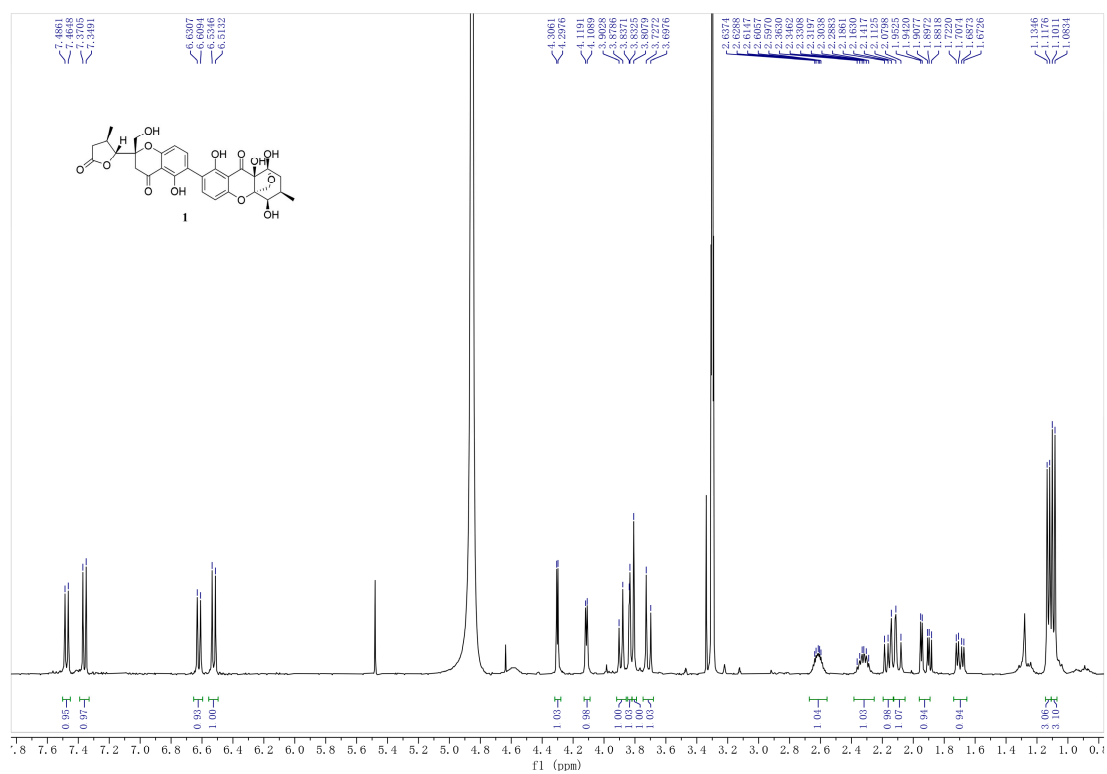

Figure S5. <sup>1</sup>H-NMR of (1)

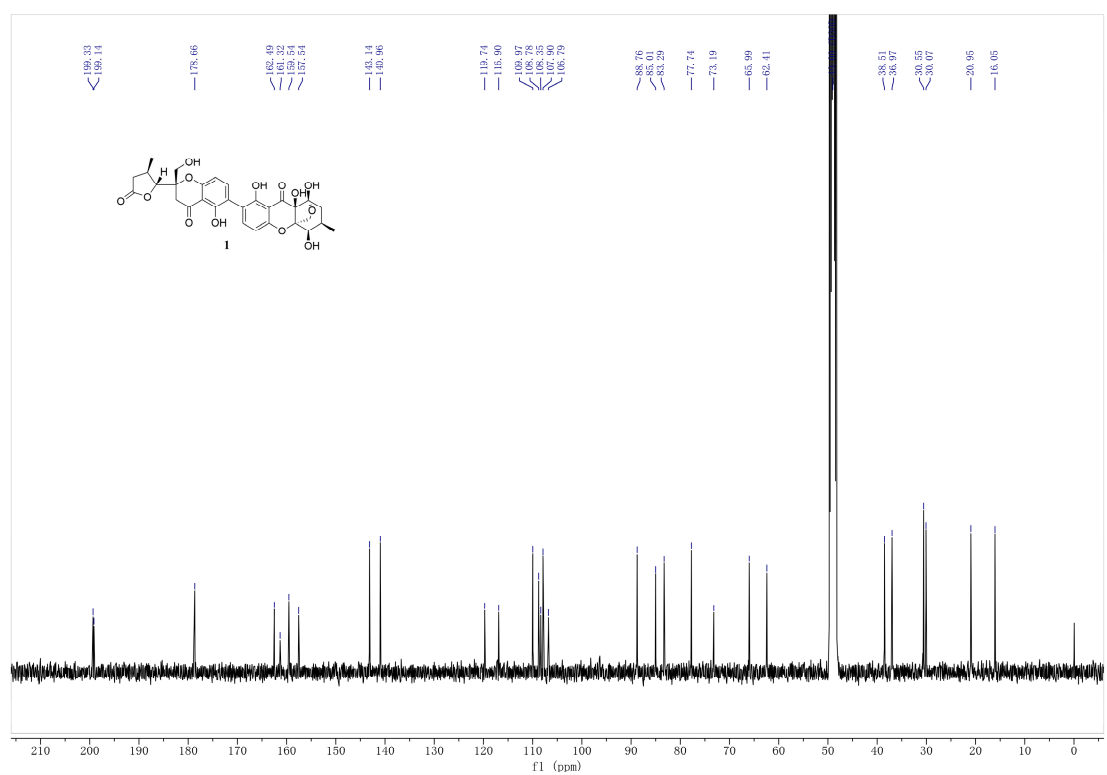

Figure S6. <sup>13</sup>C-NMR of (1)

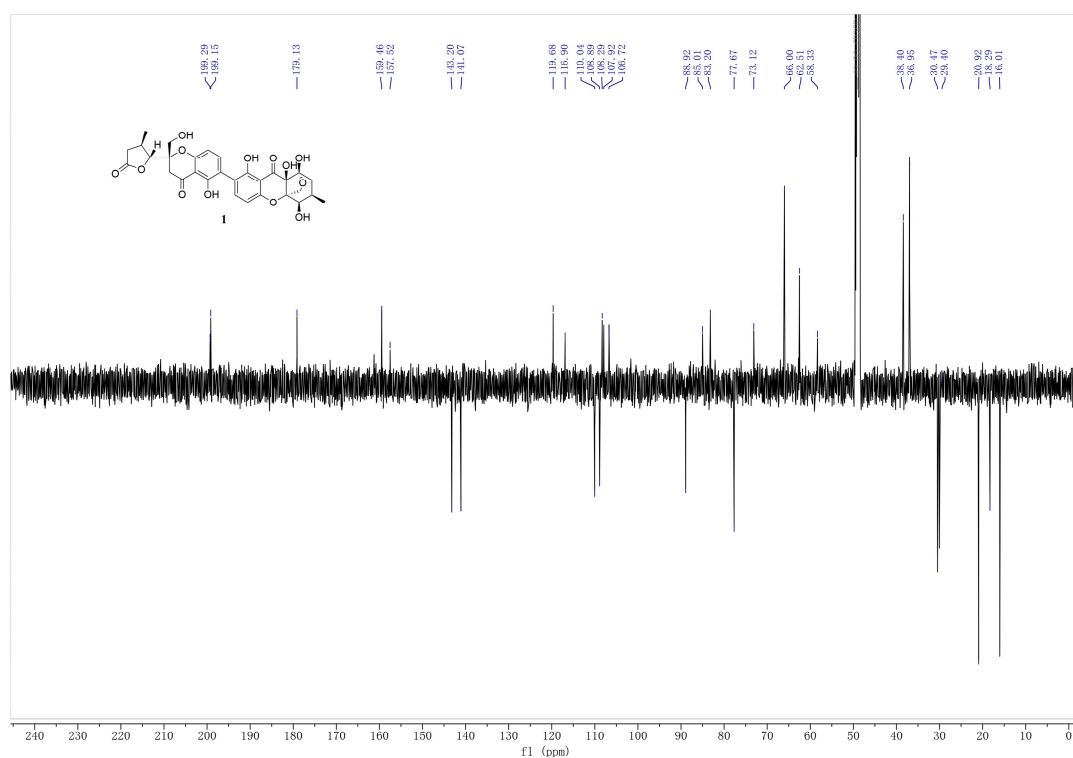

Figure S7. DEPT of (1)

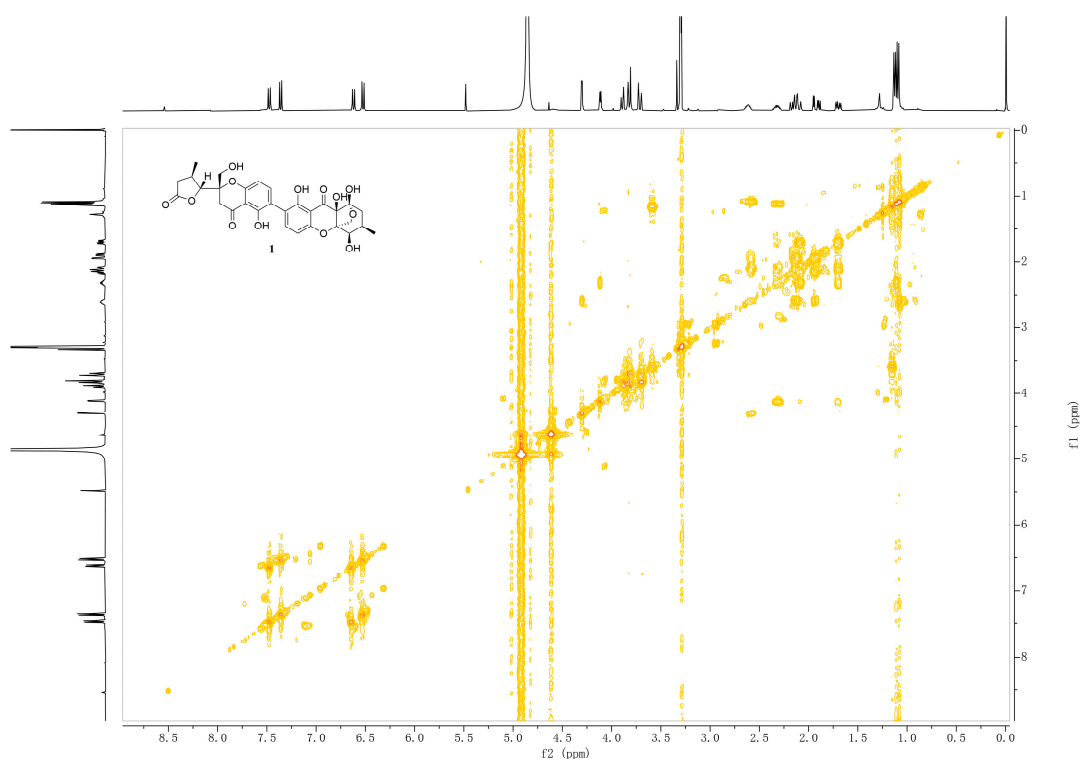

Figure S8.  $^1\text{H}$ - $^1\text{H}$  COSY of (1)

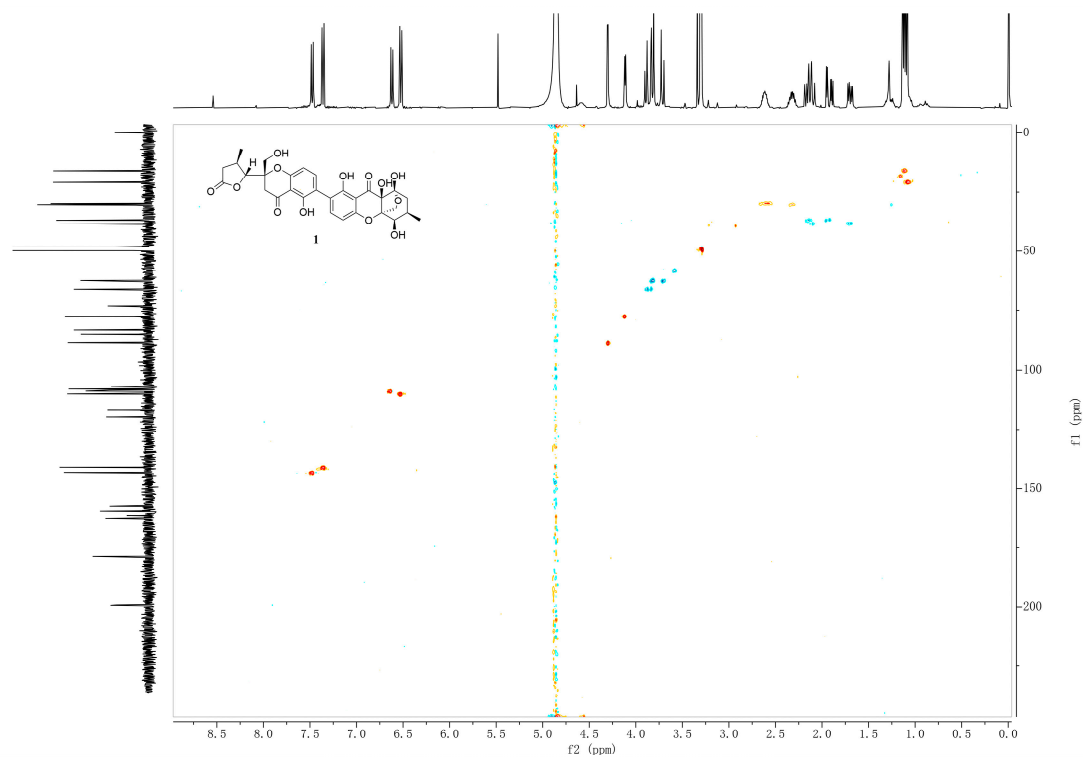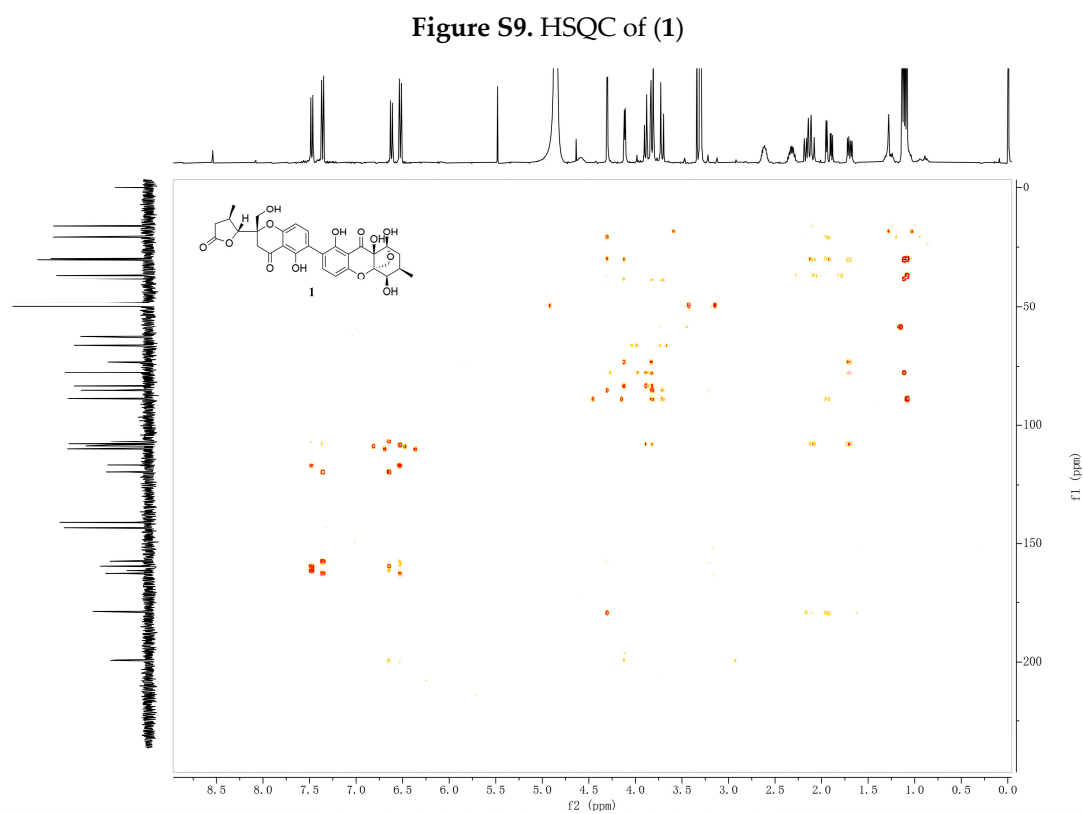

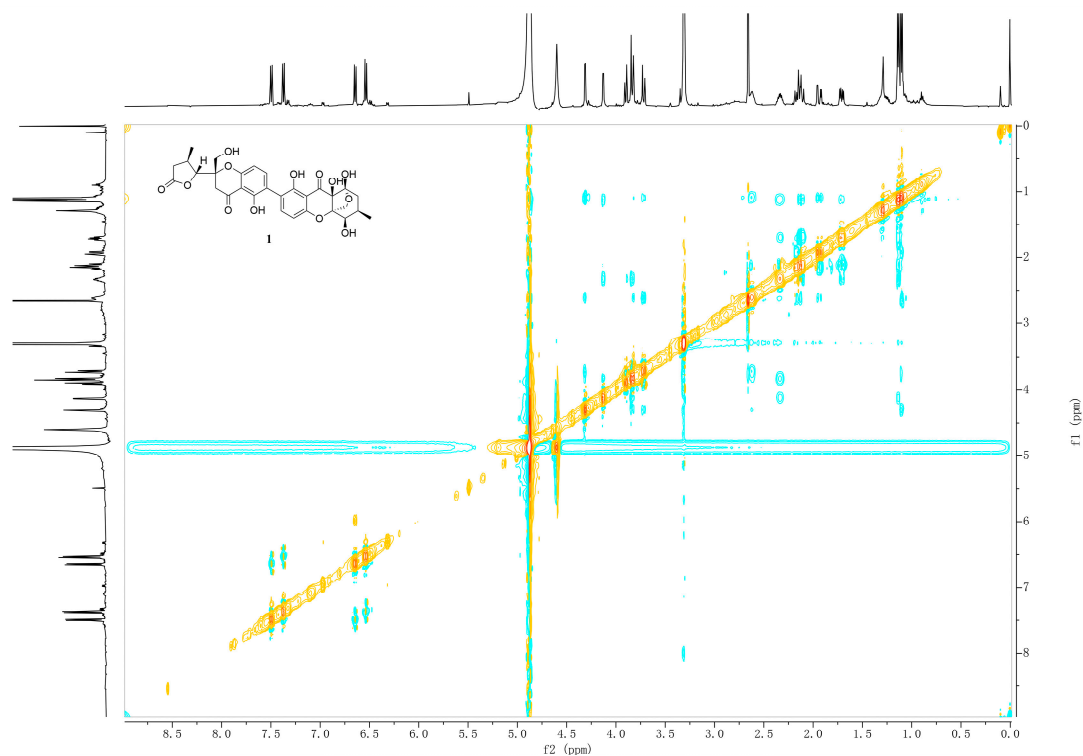

**Figure S11. NOSEY of (1)**

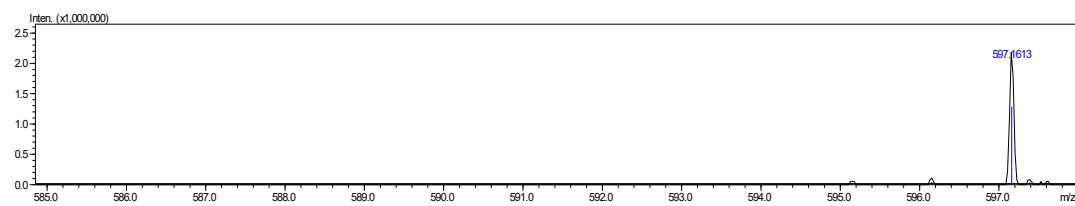

**Figure S12. HR-ESI-MS of (1)**

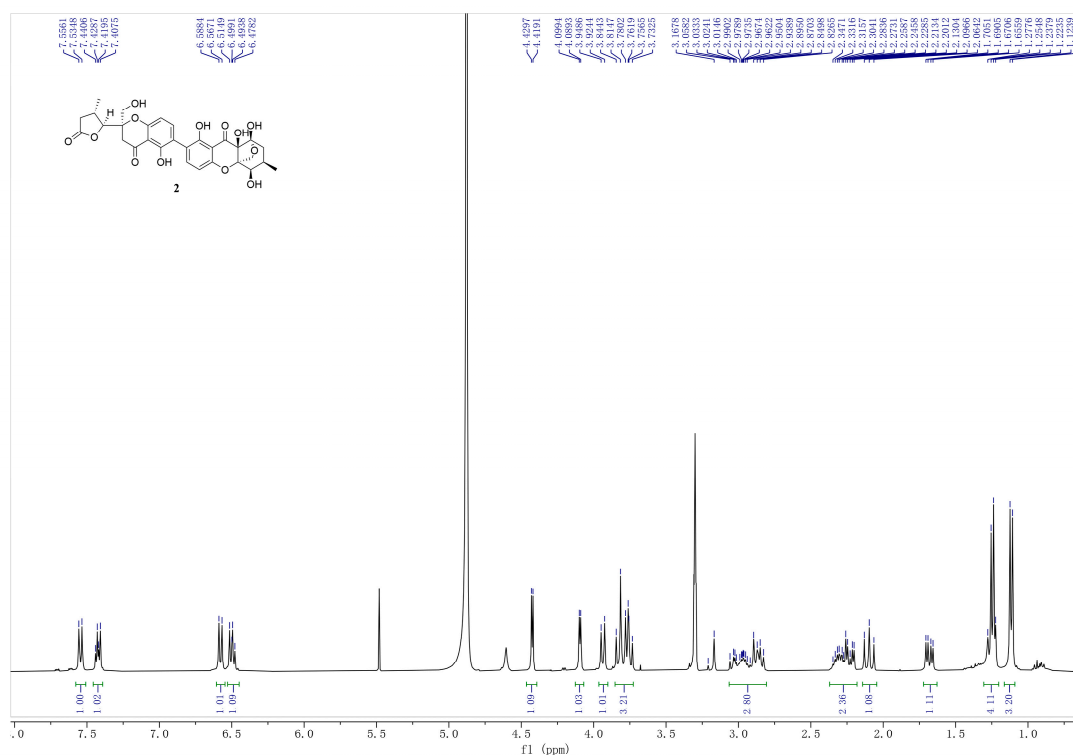

Figure S13. <sup>1</sup>H-NMR of (2)

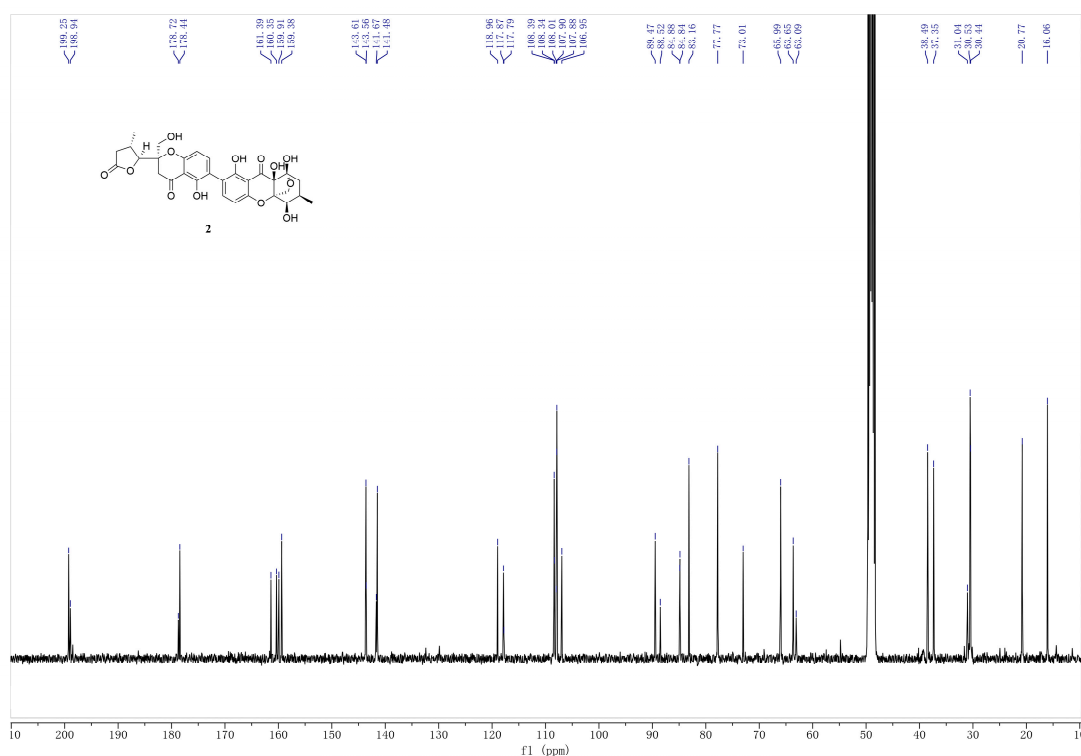

Figure S14. <sup>13</sup>C-NMR of (2)

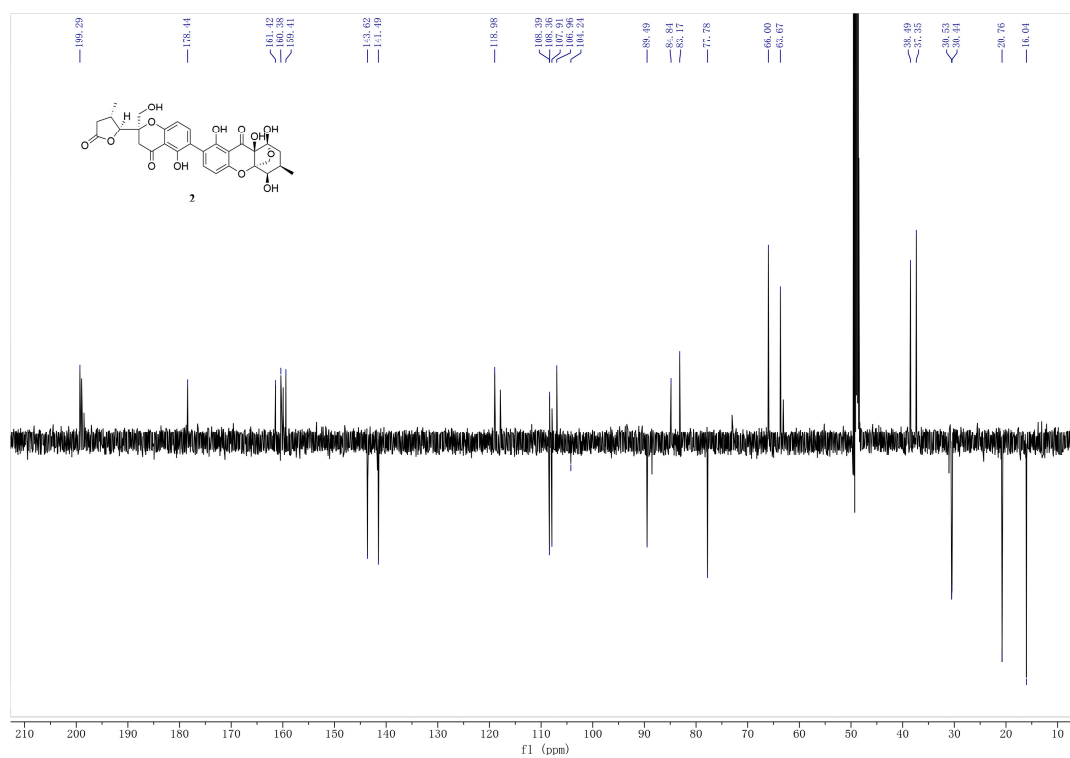

Figure S15. DEPT of (2)

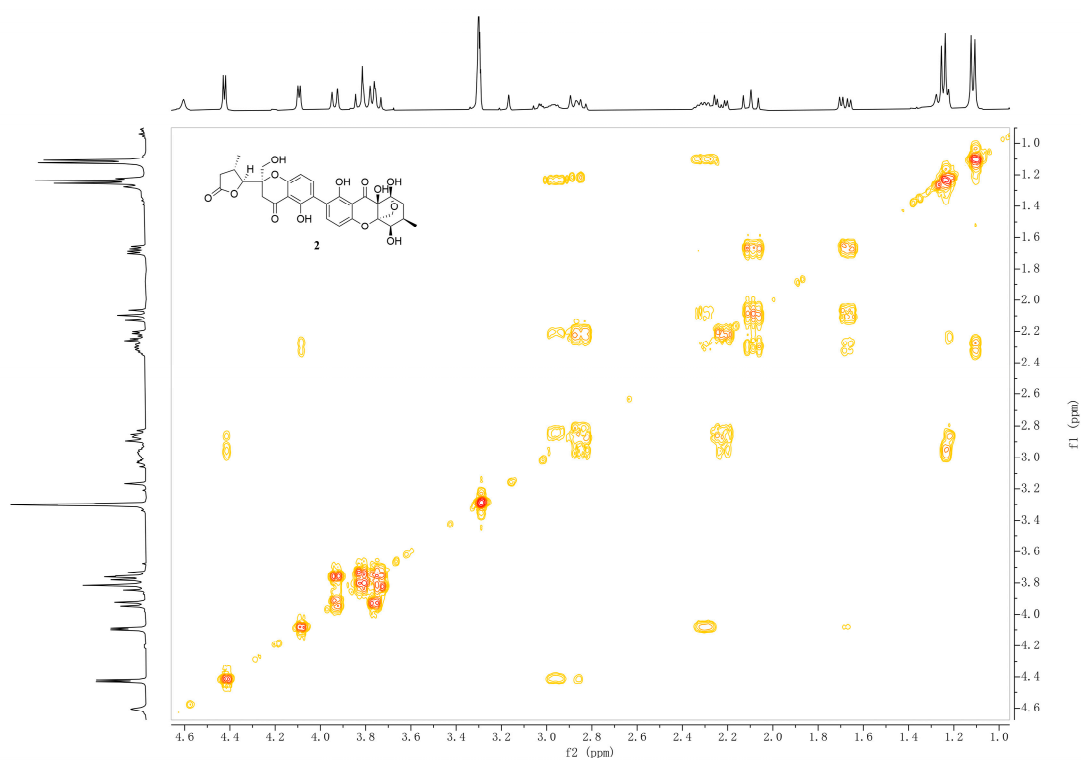

Figure S16.  $^1\text{H}$ - $^1\text{H}$  COSY of (2)



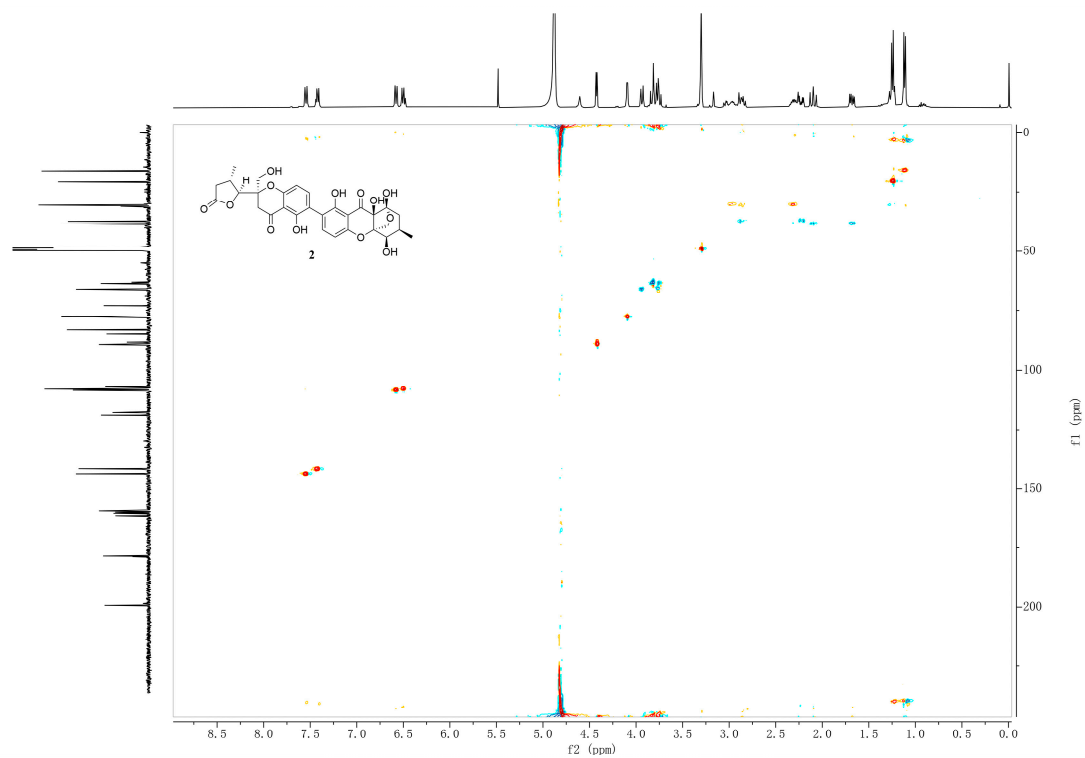

Figure S17. HSQC of (2)

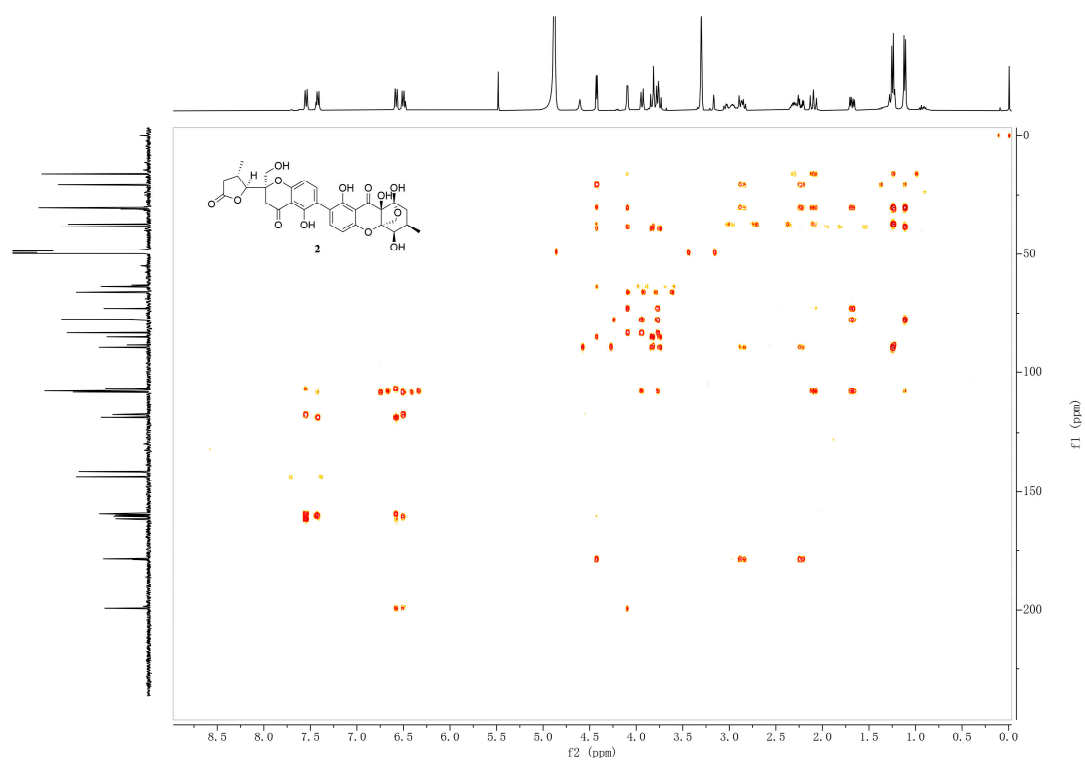

Figure S18. HMBC of (2)

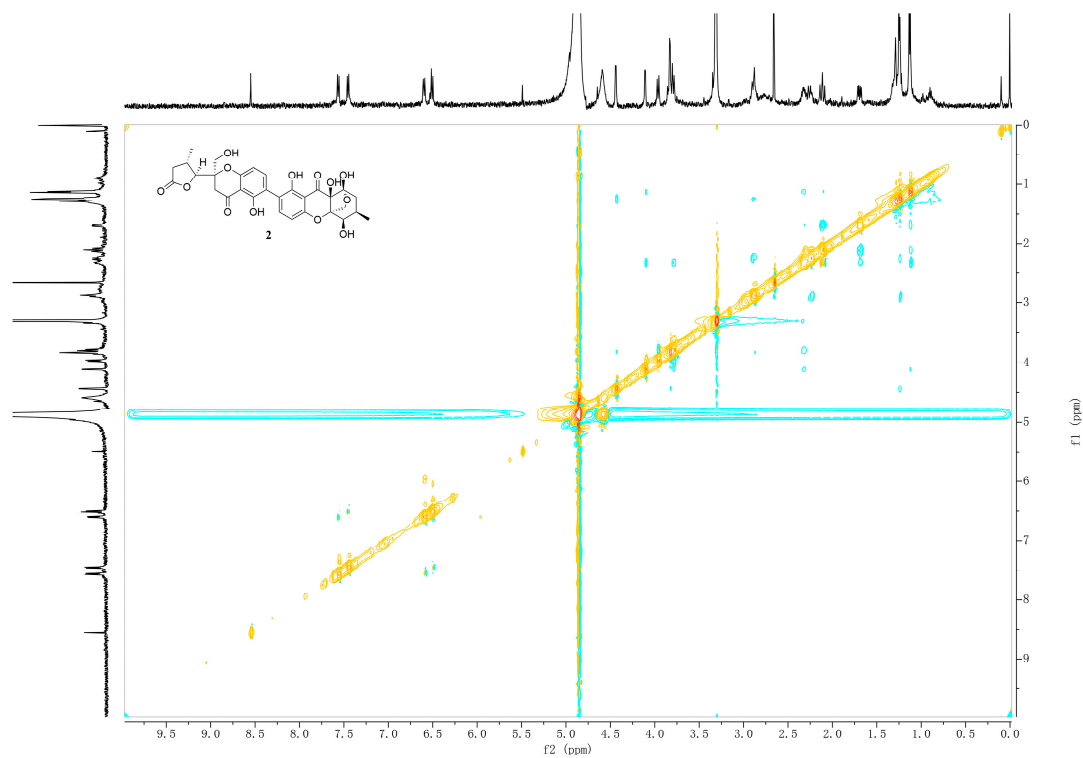

**Figure S19. NOSEY of (2)**

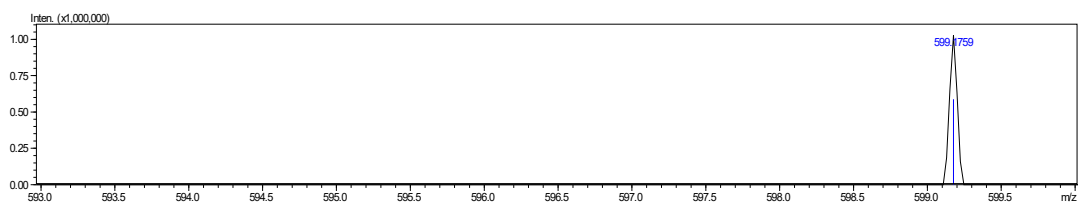

**Figure S20. HR-ESI-MS of (2)**

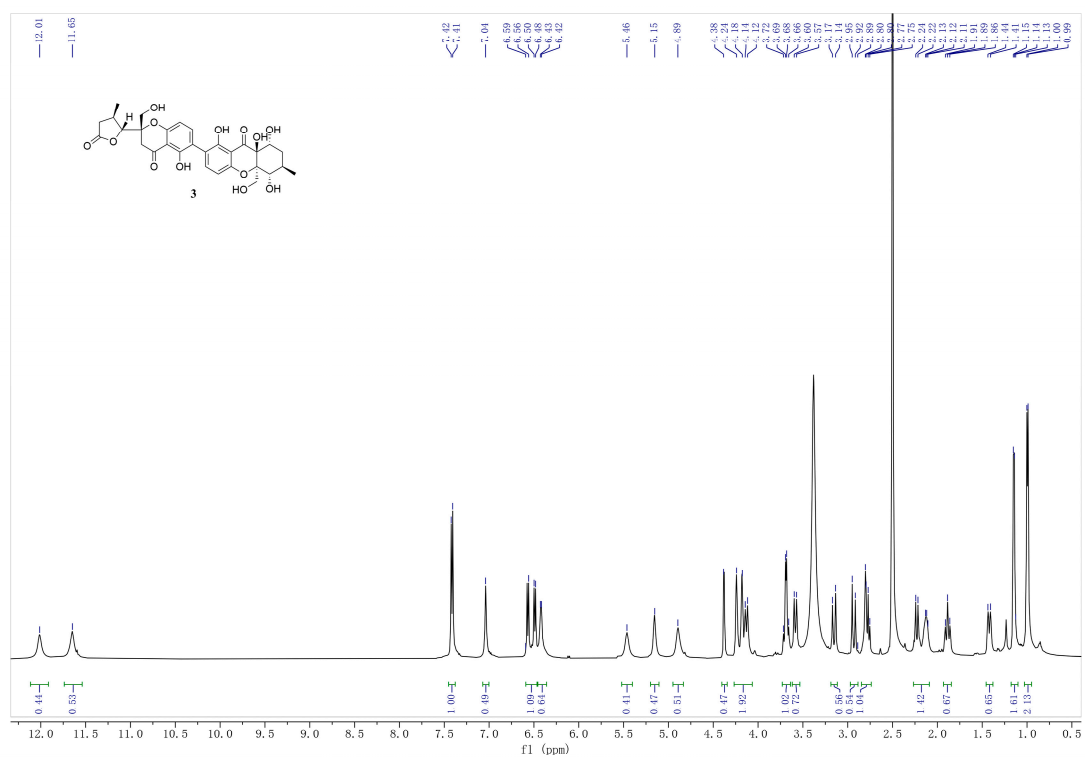

Figure S21. <sup>1</sup>H-NMR of (3)

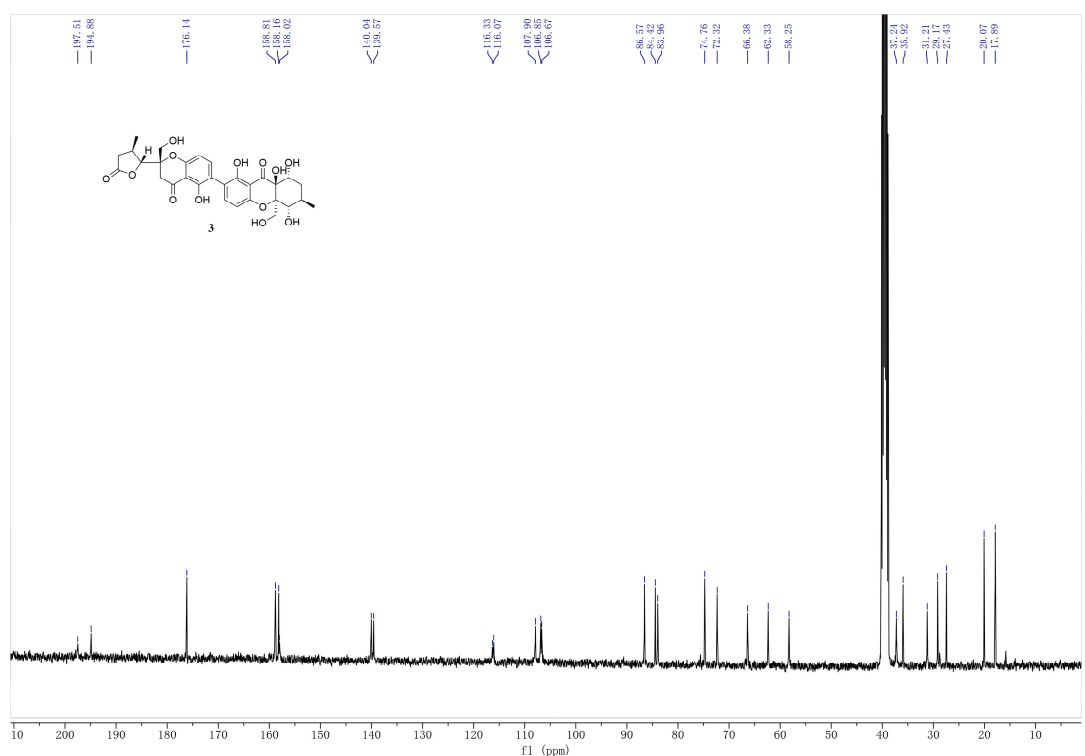

Figure S22. <sup>13</sup>C-NMR of (3)

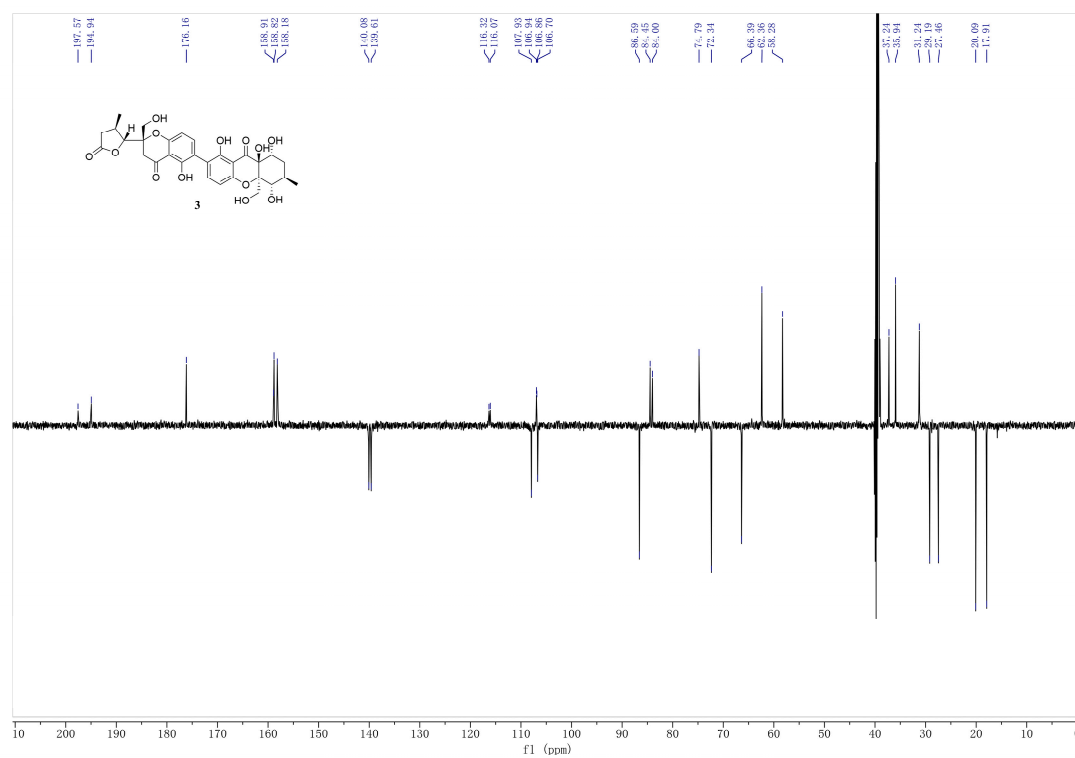

Figure S23. DEPT of (3)

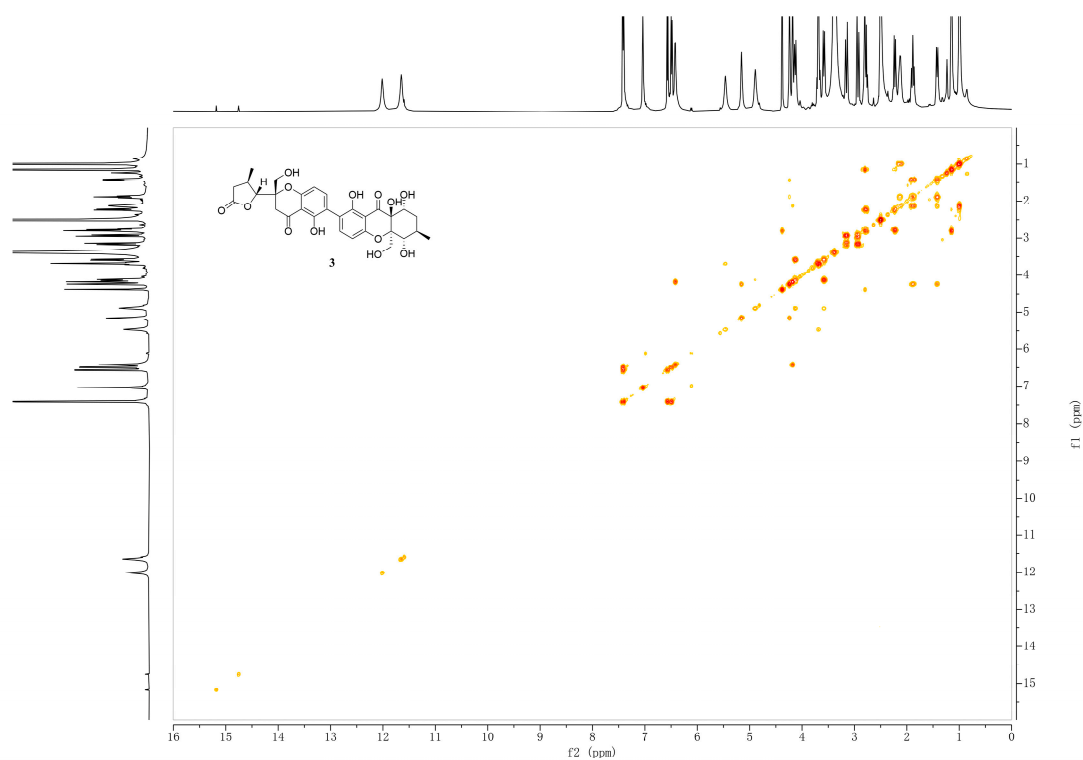

Figure S24.  $^1\text{H}$ - $^1\text{H}$  COSY of (3)

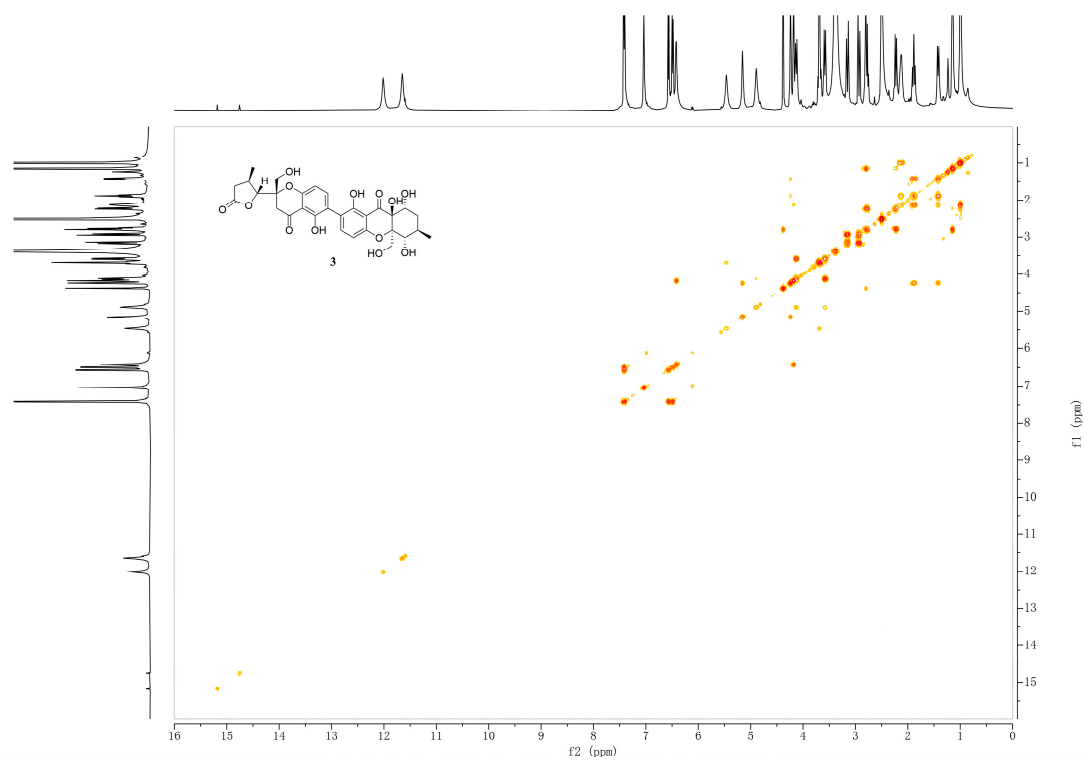

Figure S25. HSQC of (3)

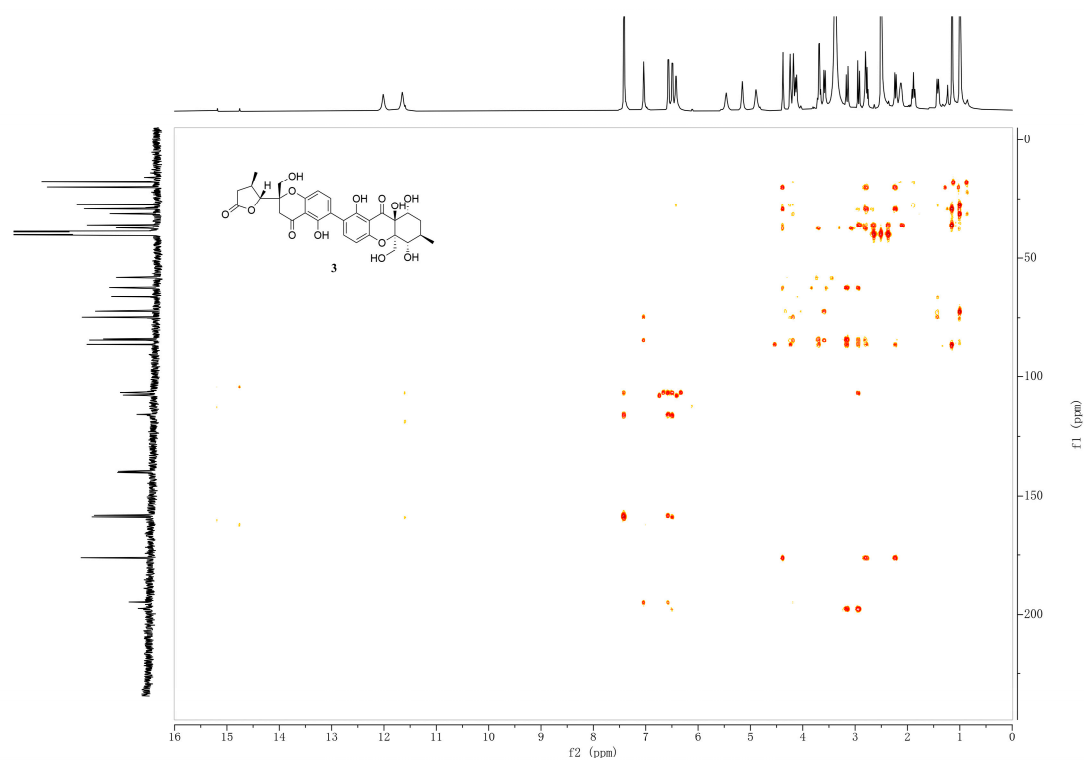

Figure S26. HMBC of (3)

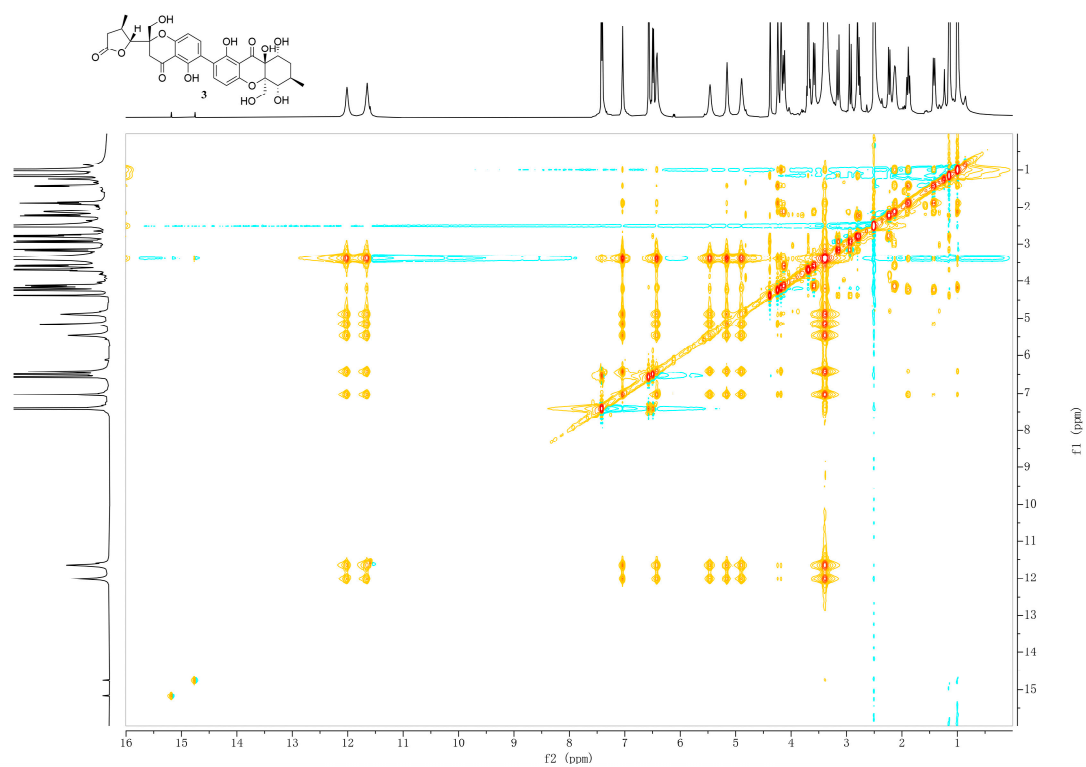

**Figure S27.** NOESY of (3)

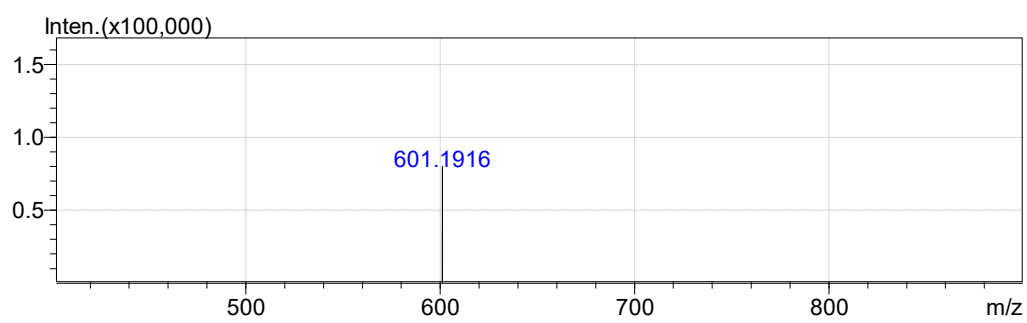

**Figure S28.** HR-ESI-MS of (3)

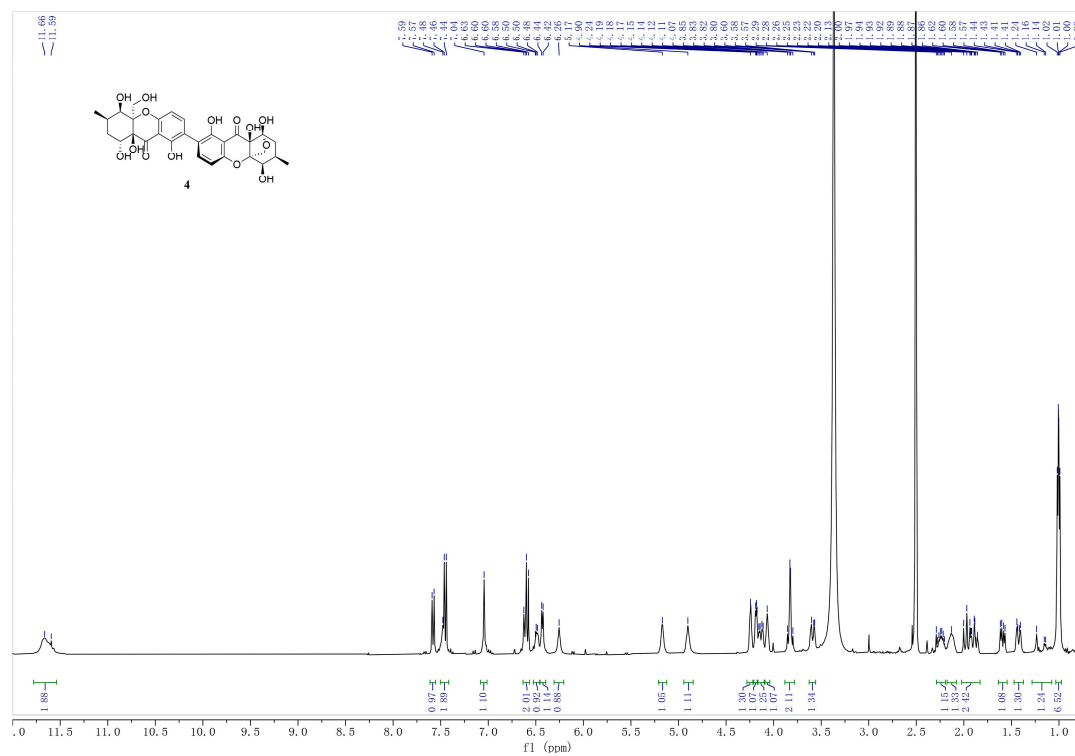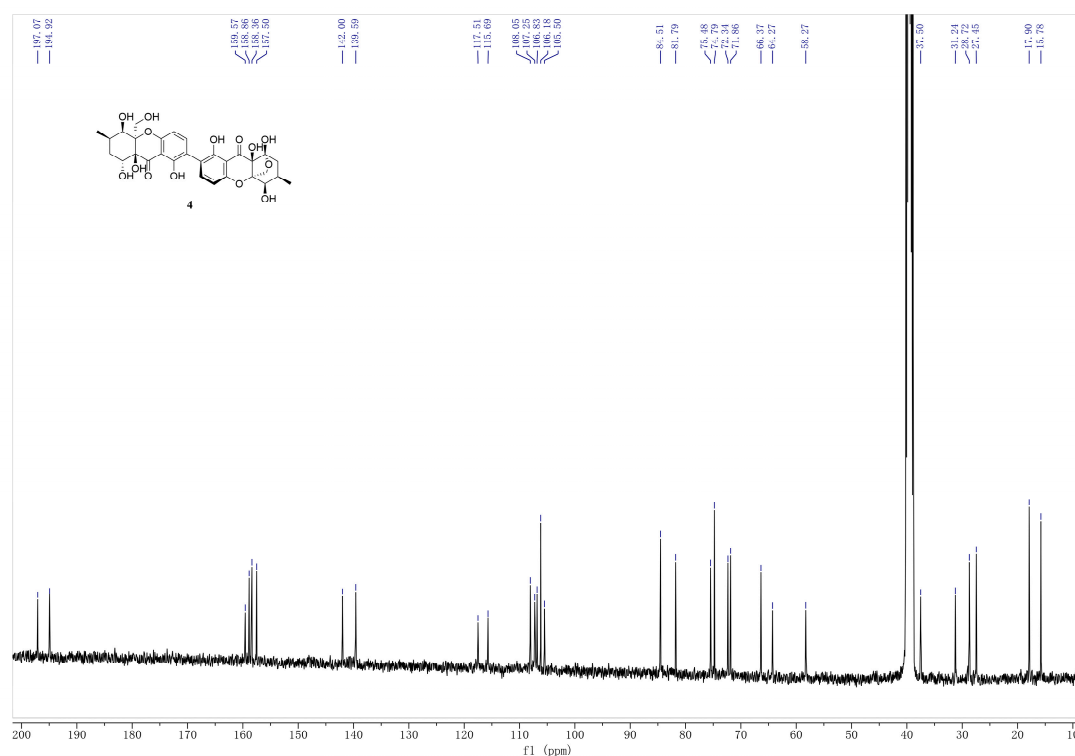

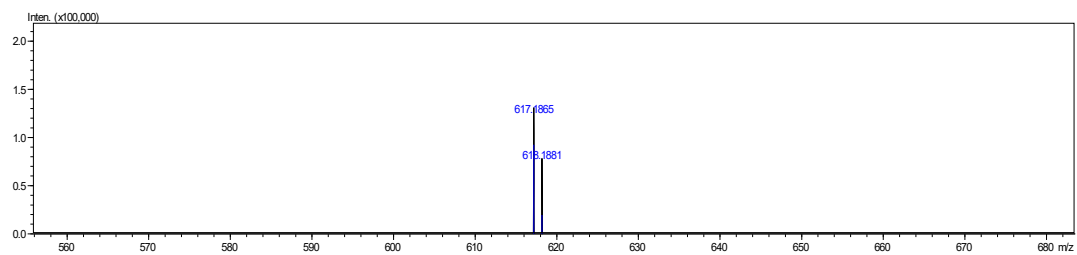

Figure S31. HR-ESI-MS of (4)

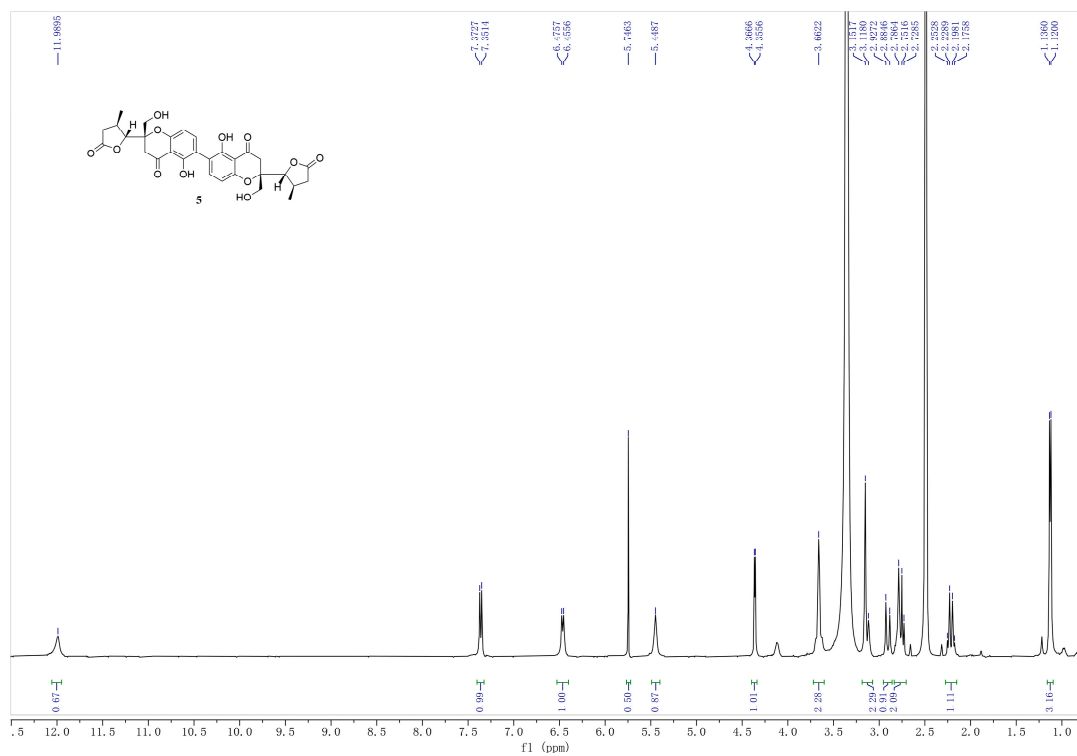

Figure S32. <sup>1</sup>H-NMR of (5)



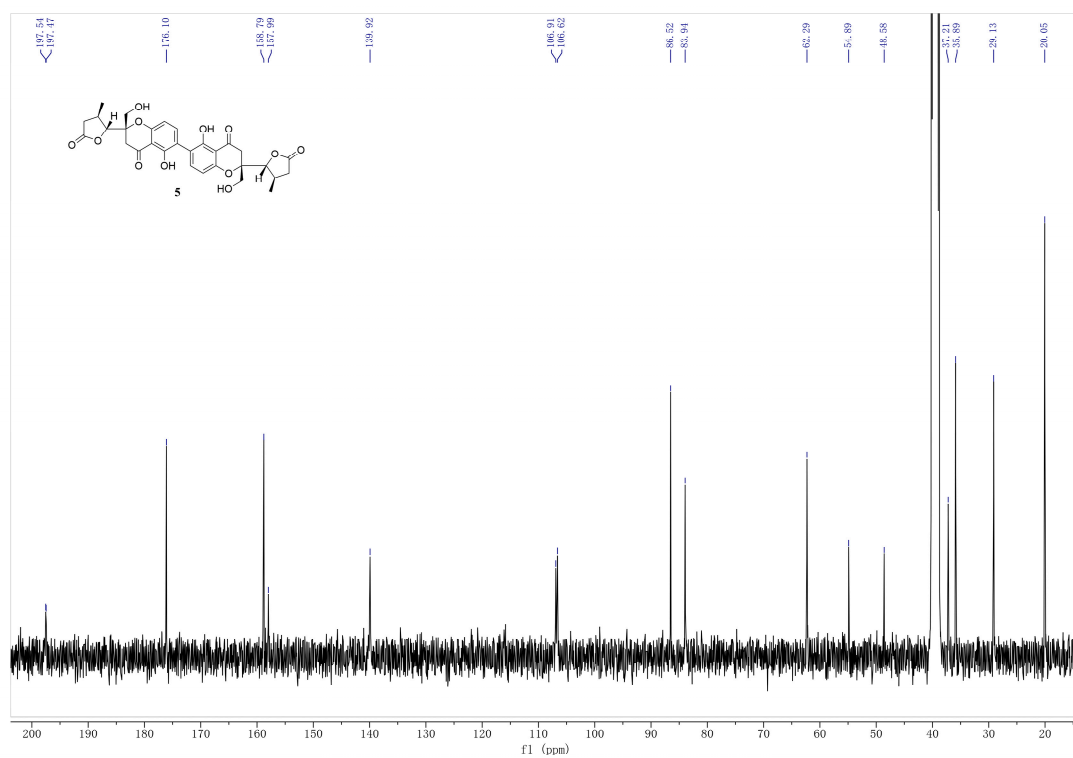

Figure S33. <sup>13</sup>C-NMR of (5)

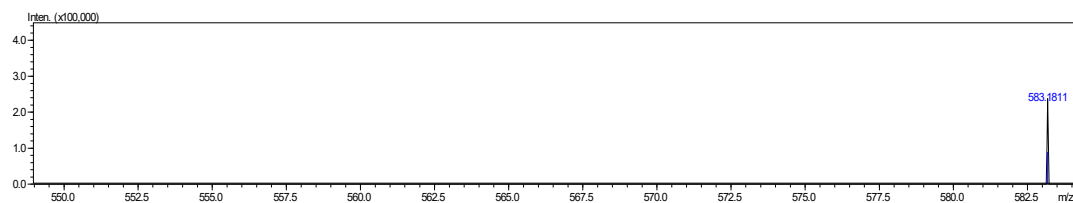

Figure S34. HR-ESI-MS of (5)

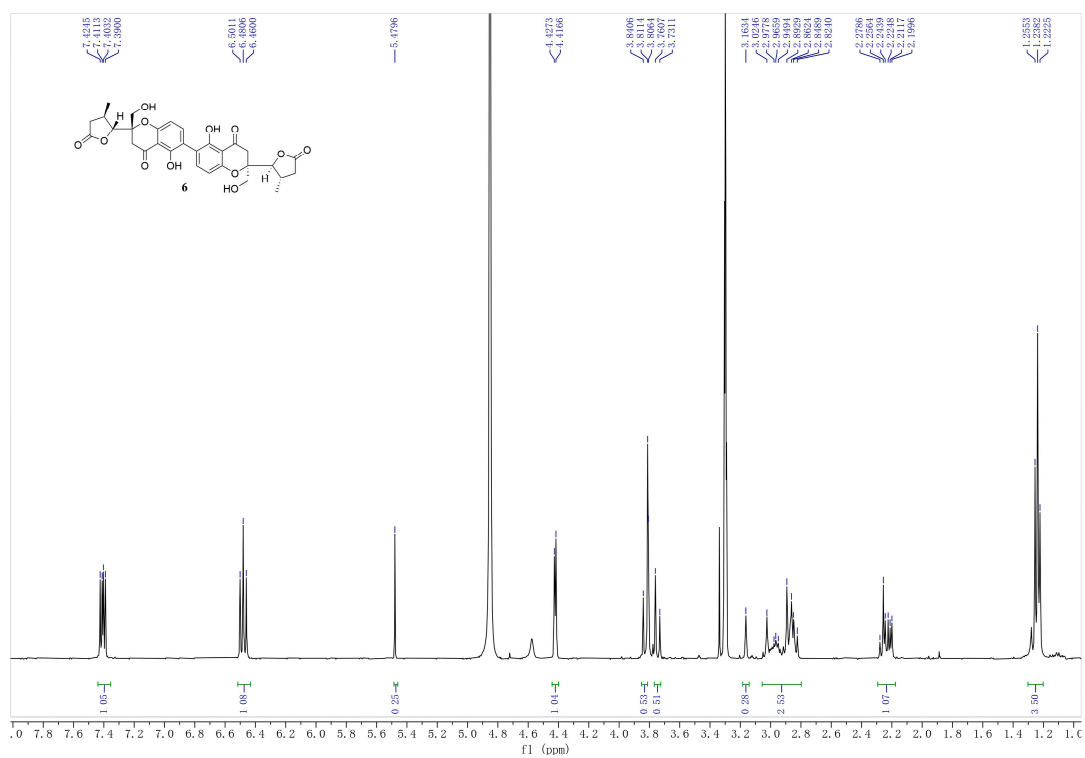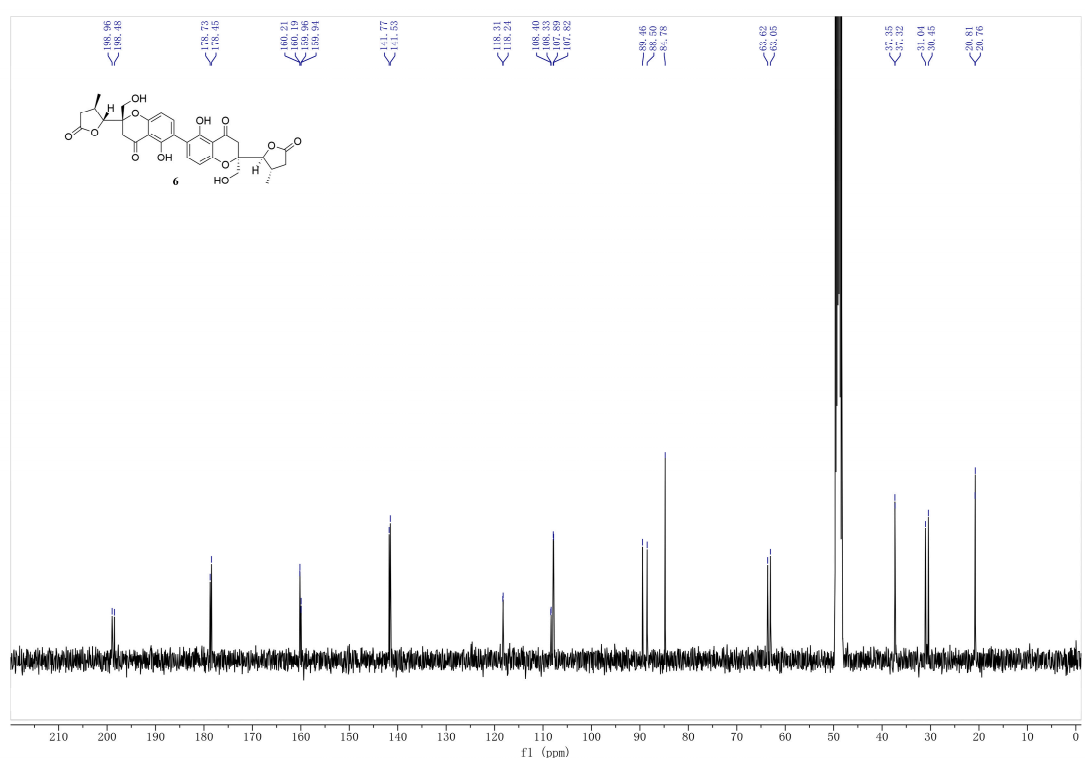

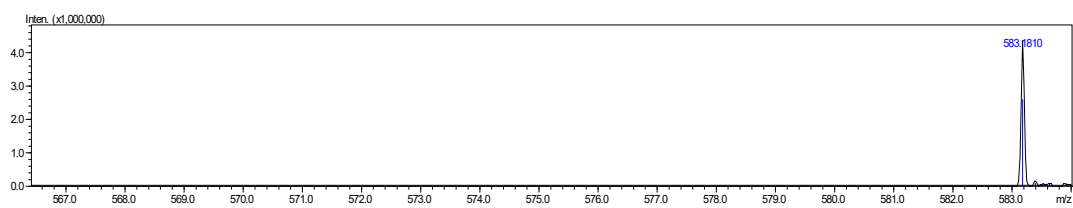

**Figure S37.** HR-ESI-MS of (6)

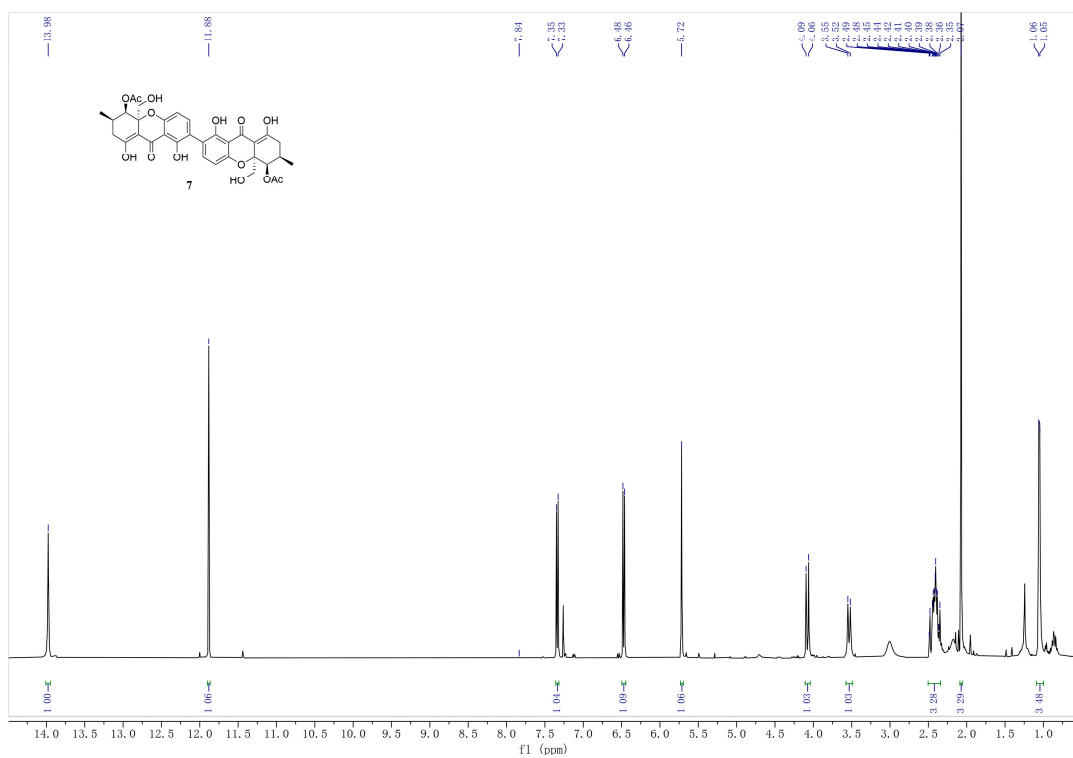

**Figure S38.**  $^1\text{H}$ -NMR of (7)

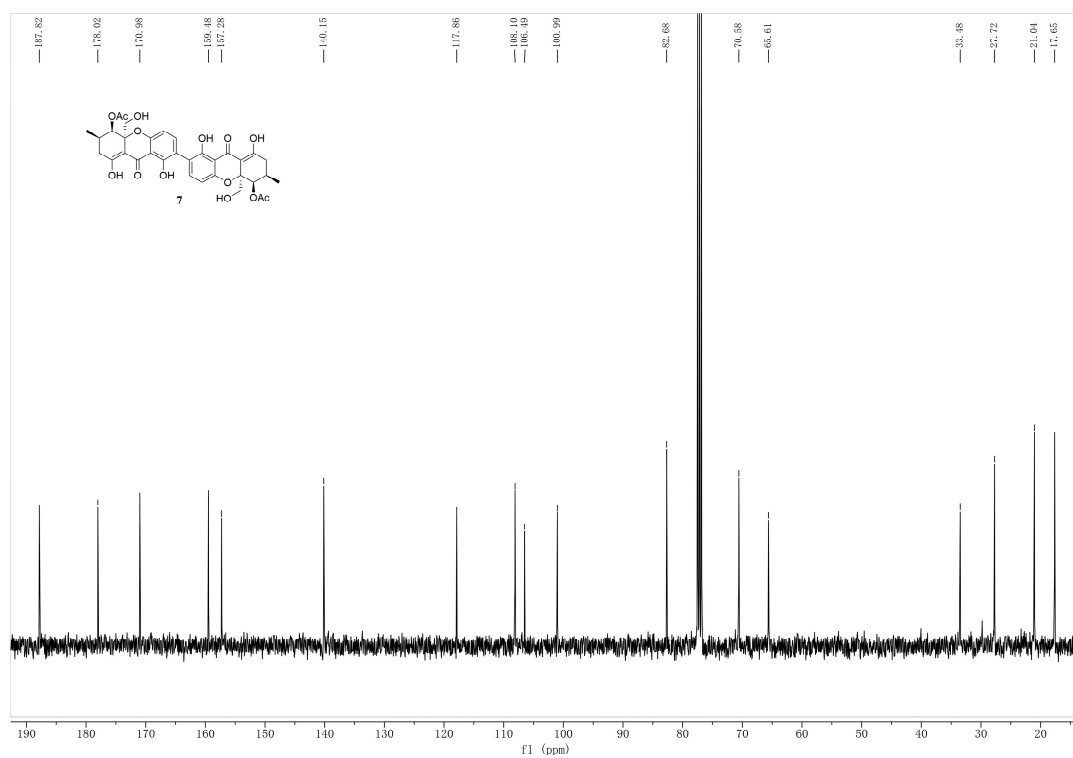

Figure S39. <sup>13</sup>C-NMR of (7)

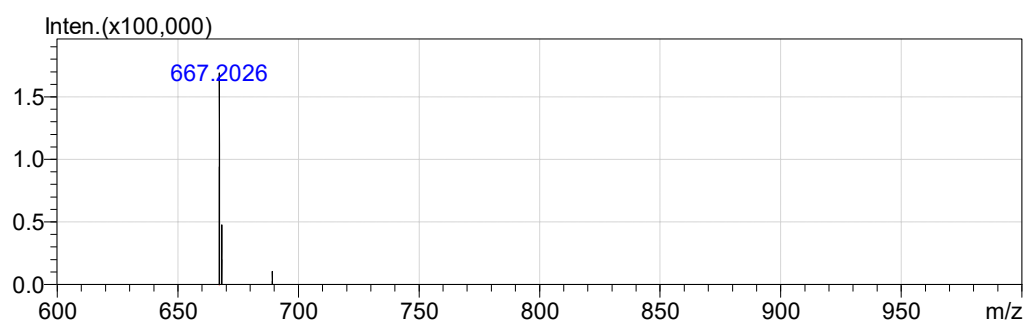

Figure S40. HR-ESI-MS of (7)

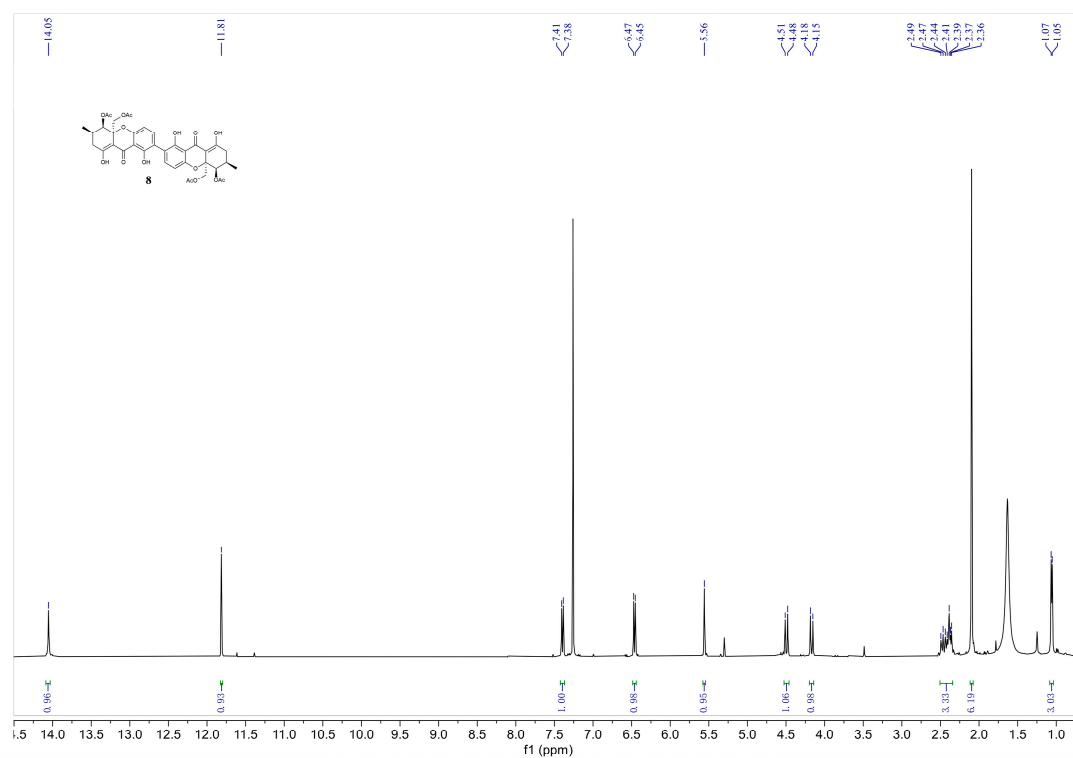

Figure S41.  $^1\text{H-NMR}$  of (8)

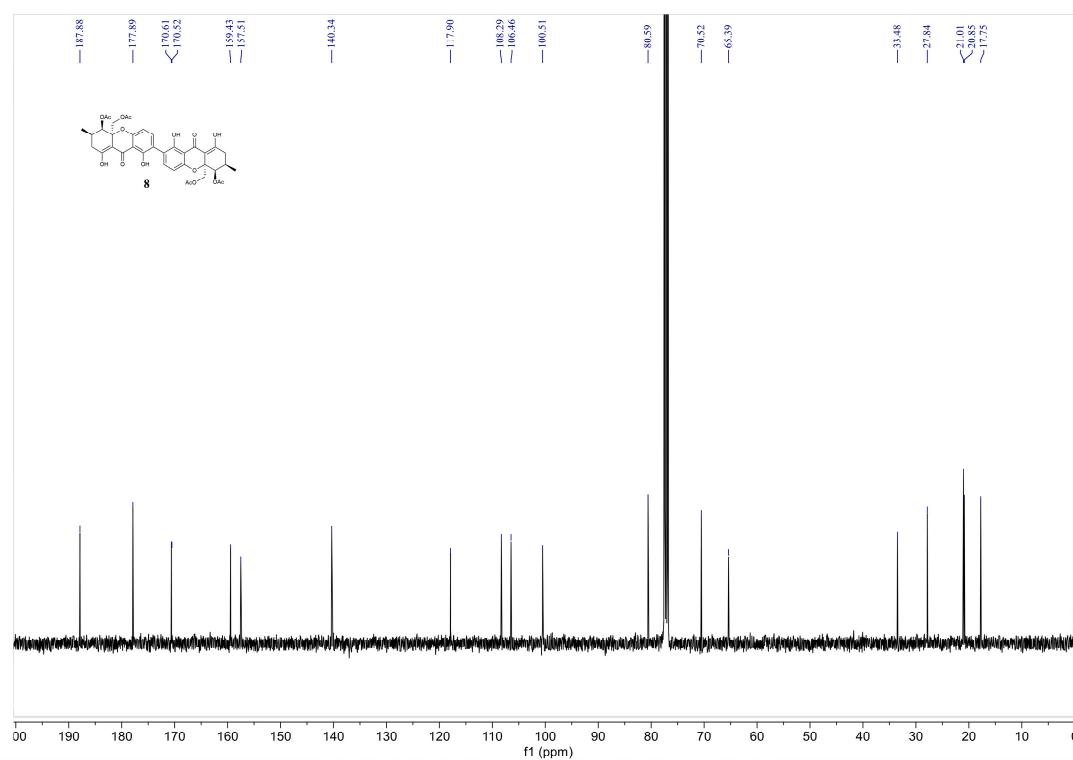

Figure S42.  $^{13}\text{C-NMR}$  of (8)

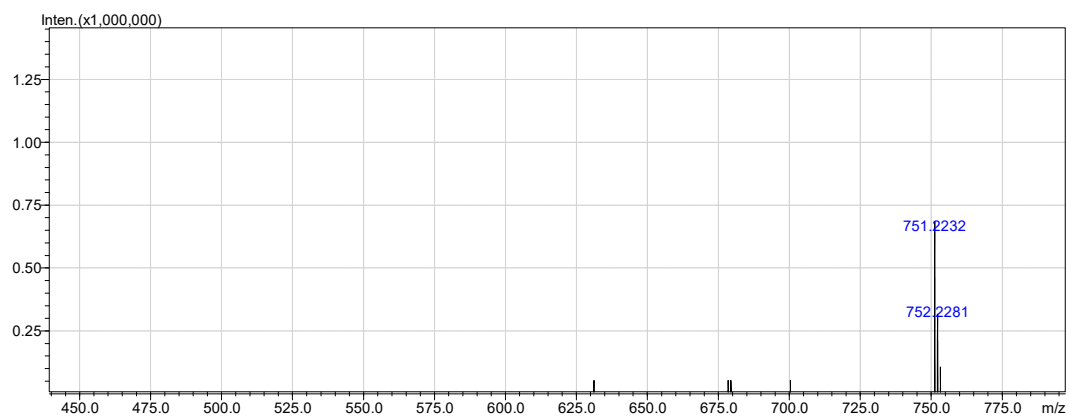

Figure S43. HR-ESI-MS of (8)

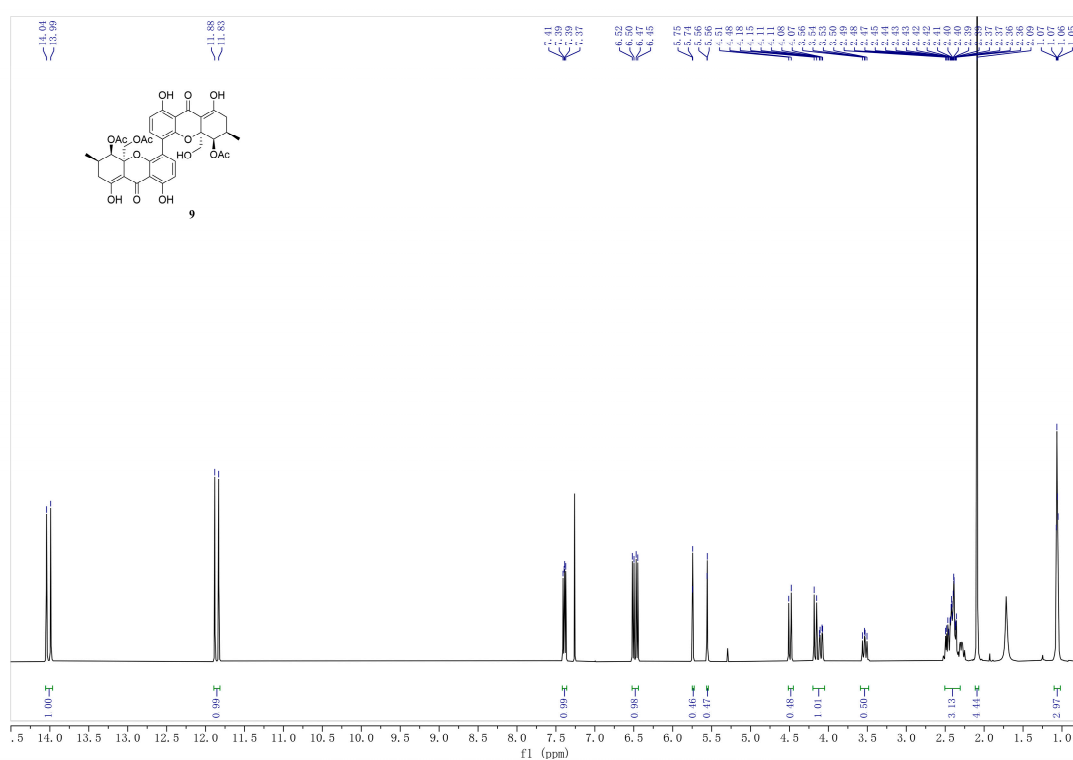

Figure S44. <sup>1</sup>H-NMR of (9)

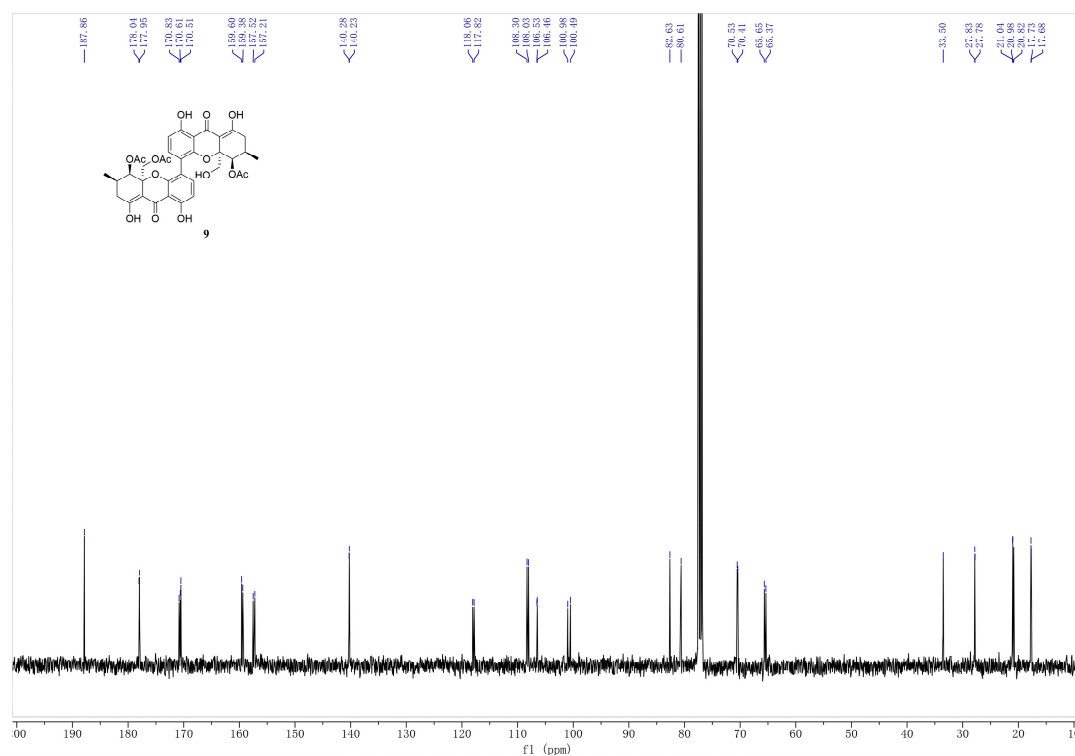

Figure S45. <sup>13</sup>C-NMR of (9)

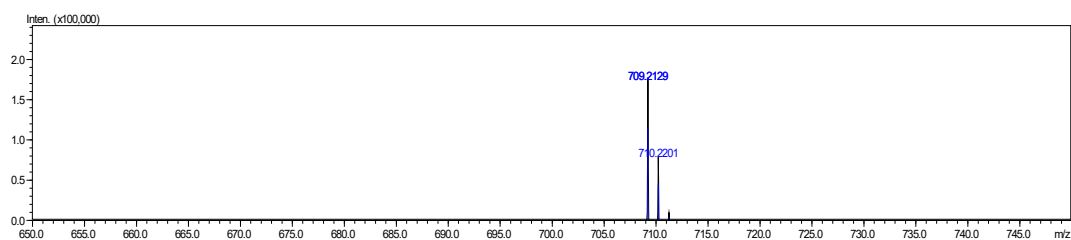

Figure S46. HR-ESI-MS of (9)

**Figure S47.** HPLC spectrum for the purity of tested compounds. HPLC chromatograms: C18 column (Agilent Technologies 10 mm×250 mm). Solvents: A, H<sub>2</sub>O; B, MeOH. Linear gradient: 0 min, 60% B; 40 min, 100% B. Temperature 25°C. Flow rate 2 mL/min. UV detection at  $\lambda = 210$  nm.

**Compound 1**

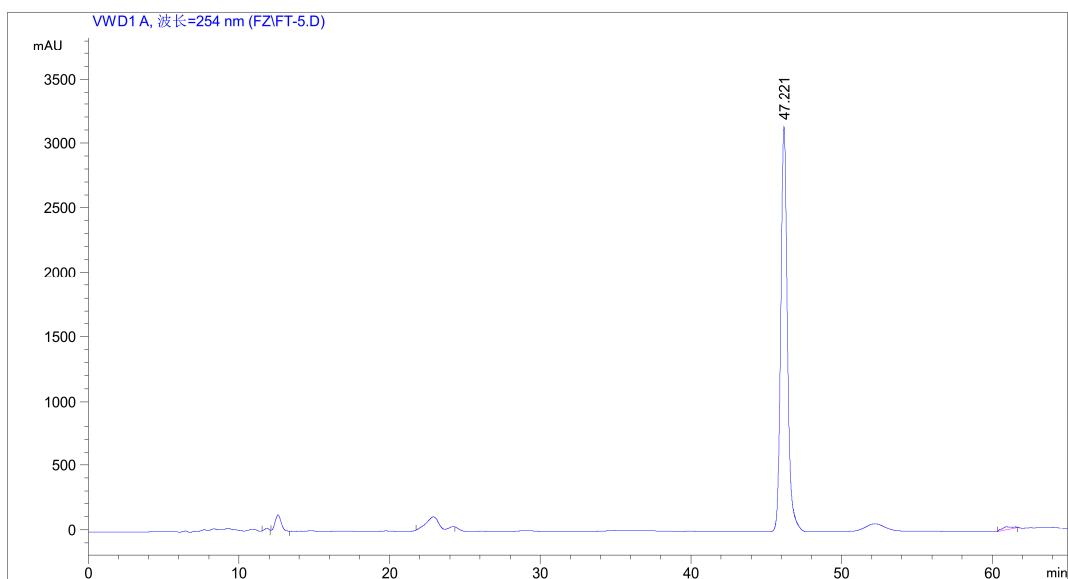

| Peak # | Retention time [min] | Peak type | Peak width [min] | Peak area mAU *s | Peak height [mAU] | Peak area% |
|--------|----------------------|-----------|------------------|------------------|-------------------|------------|
| 1      | 47.221               | BB        | 1.2593           | 1.20996e5        | 3106.93091        | 100.0000   |

## Compound 2

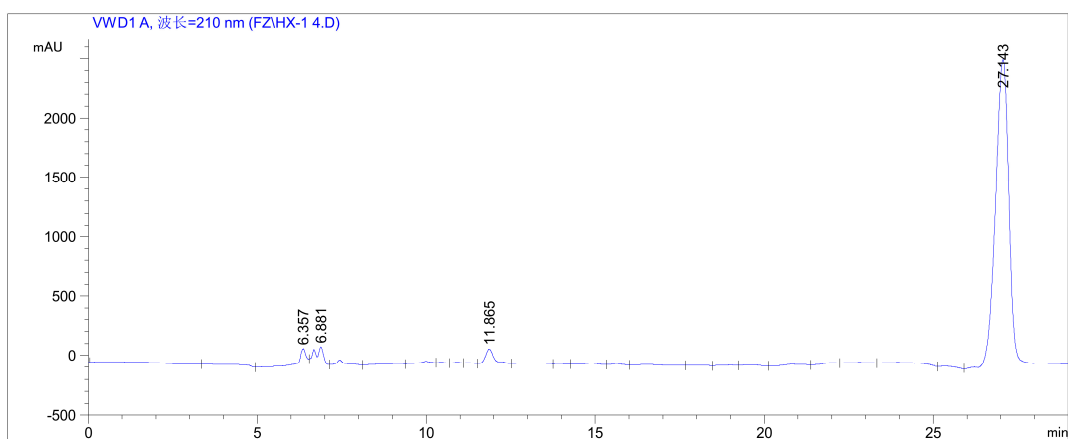

| Peak # | Retention time [min] | Peak type | Peak width [min] | Peak area mAU *s | Peak height [mAU] | Peak area% |
|--------|----------------------|-----------|------------------|------------------|-------------------|------------|
| 1      | 6.357                | VV        | 0.2441           | 2710.28540       | 155.47215         | 2.5016     |
| 2      | 6.881                | VV        | 0.2796           | 3483.05005       | 170.15250         | 3.2149     |
| 3      | 11.865               | VV        | 0.3394           | 3600.01855       | 149.40637         | 3.3228     |
| 4      | 27.143               | VV        | 0.4409           | 7.39464e4        | 2612.70605        | 90.9607    |

## Compound 3



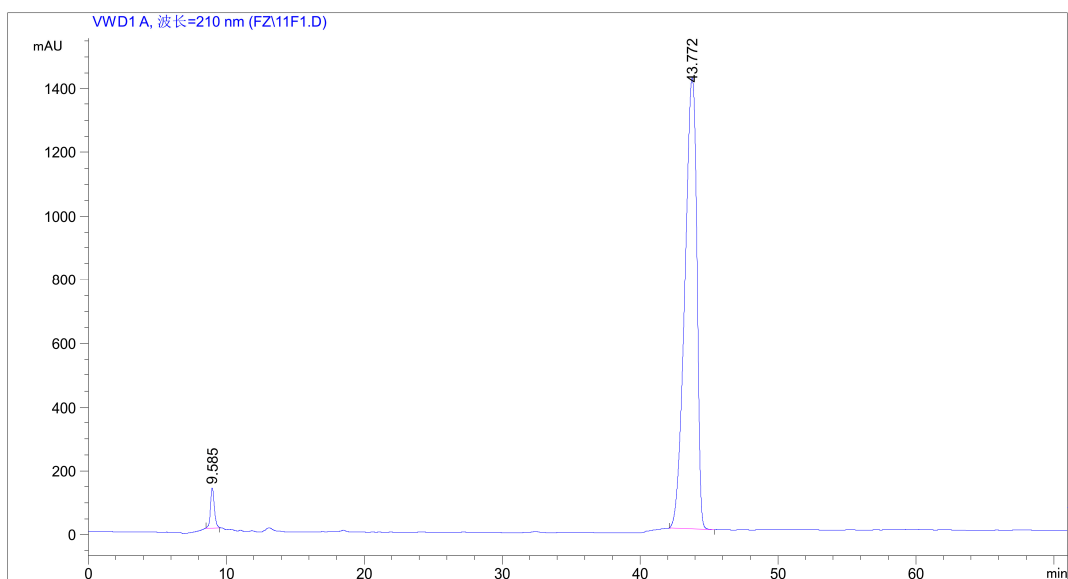

| Peak | Retention time | Peak type | Peak width | Peak area  | Peak height | Peak area% |
|------|----------------|-----------|------------|------------|-------------|------------|
| 1    | 9.585          | BB        | 0.1490     | 1217.36353 | 126.09512   | 3.5773     |
| 2    | 43.772         | BB        | 0.9359     | 3.28125e4  | 1473.50134  | 96.4227    |

#### Compound 4

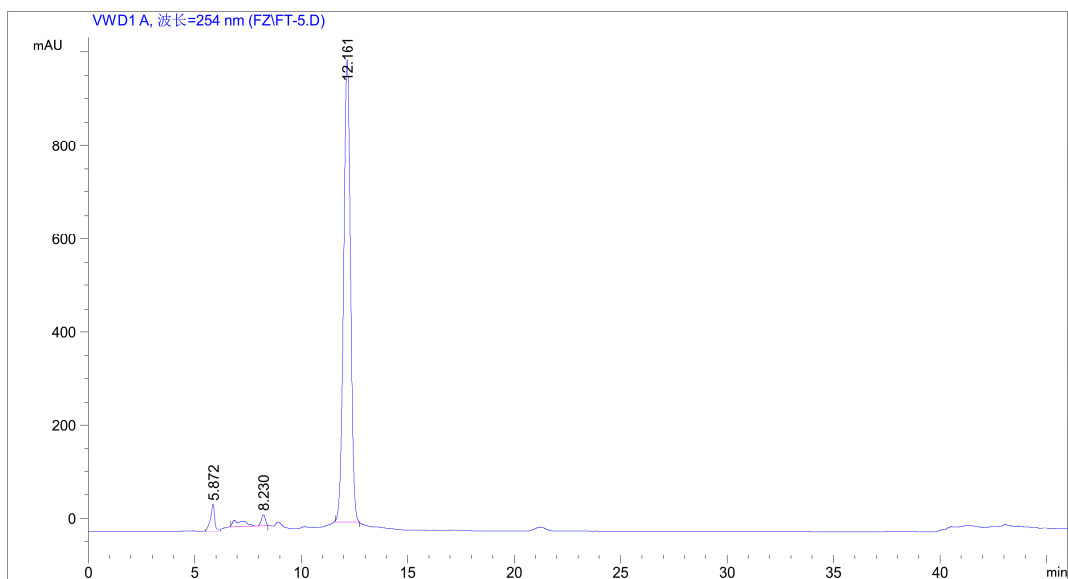

| Peak | Retention time | Peak type | Peak width | Peak area  | Peak height | Peak area% |
|------|----------------|-----------|------------|------------|-------------|------------|
| #    | [min]          |           | [min]      | mAU *s     | [mAU ]      | %          |
| 1    | 5.872          | BH        | 0.2014     | 1132.56433 | 53.58827    | 4.6731     |
| 2    | 8.230          | HB S      | 0.4741     | 821.06448  | 23.47560    | 3.3519     |
| 3    | 12.161         | BB S      | 0.3498     | 2.22909e4  | 990.78613   | 91.9750    |

## Compound 5

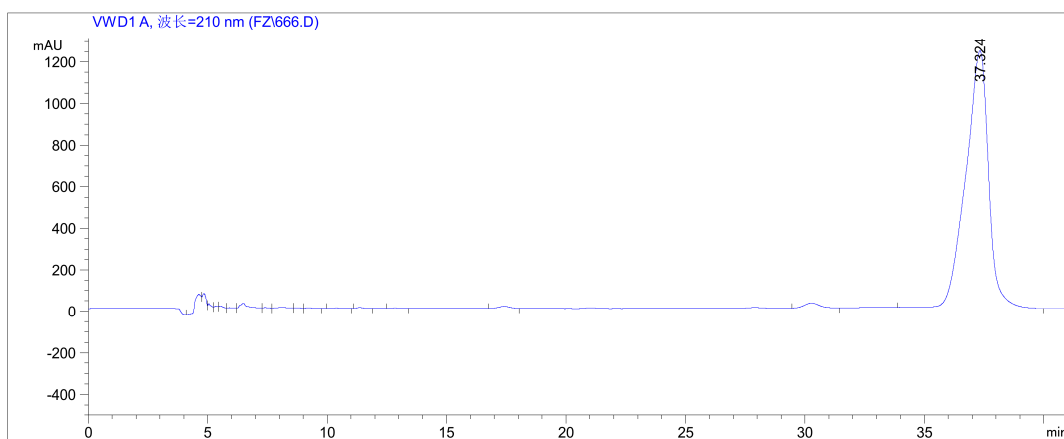

| Peak | Retention time | Peak type | Peak width | Peak area | Peak height | Peak area% |
|------|----------------|-----------|------------|-----------|-------------|------------|
| 1    | 37.324         | BB        | 0.9588     | 8.20048e4 | 1238.60803  | 100.0000   |

## Compound 6

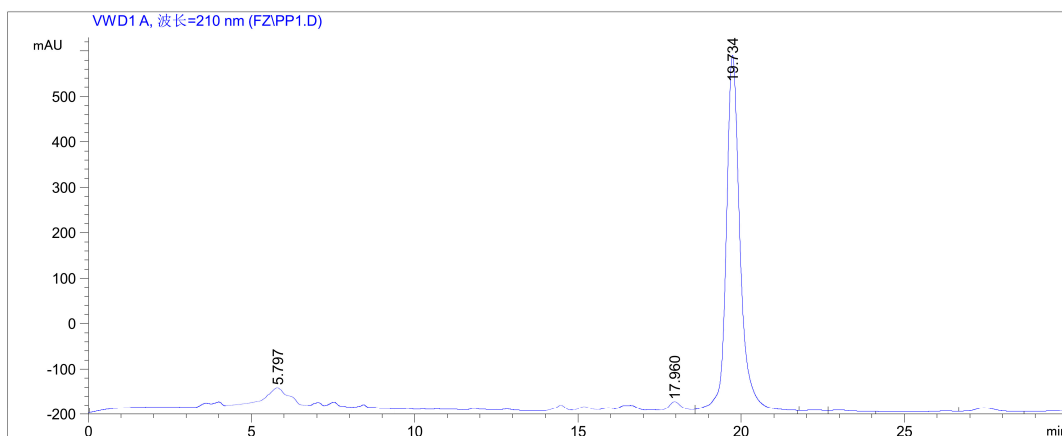

| Peak | Retention time | Peak type | Peak width | Peak area  | Peak height | Peak area% |
|------|----------------|-----------|------------|------------|-------------|------------|
| #    | [min]          |           | [min]      | mAU *s     | [mAU ]      | %          |
| 1    | 5.797          | VV        | 0.8172     | 2295.15214 | 59.36319    | 8.5691     |
| 2    | 17.960         | VV        | 0.4163     | 932.30321  | 35.99451    | 3.4808     |
| 3    | 19.734         | VB        | 0.4486     | 2.35566e4  | 786.22247   | 87.9501    |

## Compound 7

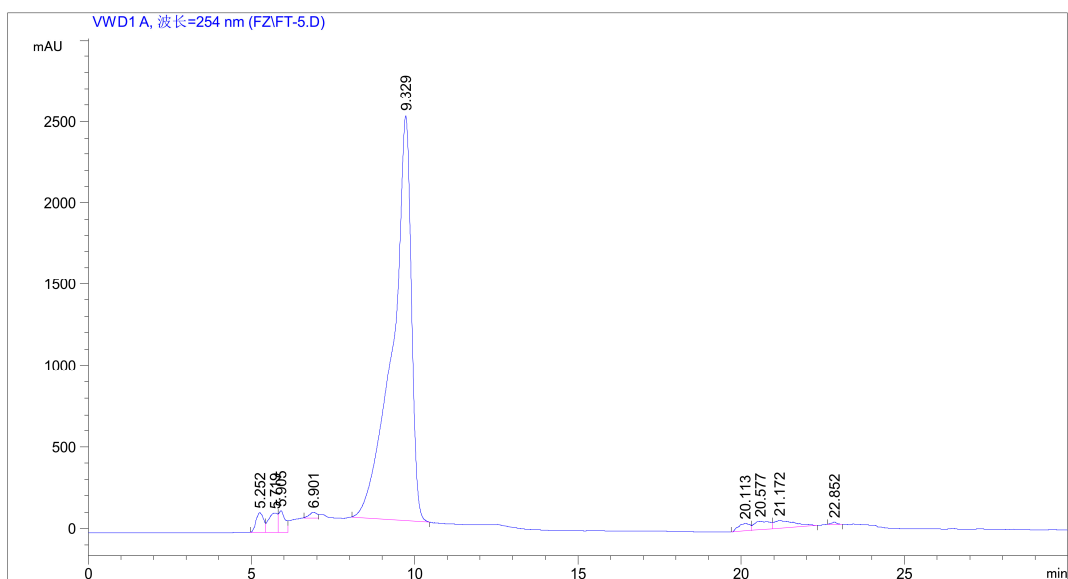

| Peak # | Retention time [min] | Peak type | Peak width [min] | Peak area mAU *s | Peak height [mAU] | Peak area% |
|--------|----------------------|-----------|------------------|------------------|-------------------|------------|
| 1      | 5.252                | BV        | 0.2374           | 1921.10400       | 120.19498         | 1.1893     |
| 2      | 5.719                | VV        | 0.2798           | 2198.30981       | 118.07137         | 1.3609     |
| 3      | 5.905                | VH        | 0.1942           | 1846.34888       | 131.64180         | 1.1430     |
| 4      | 6.901                | HH S      | 0.2324           | 563.54315        | 35.38733          | 0.3489     |
| 5      | 9.329                | BB S      | 0.5536           | 9.90195e4        | 2485.68408        | 92.9052    |
| 6      | 20.113               | BV        | 0.2920           | 1095.53711       | 45.34671          | 0.6782     |
| 7      | 20.577               | VV        | 0.4129           | 1690.26416       | 50.99595          | 1.0464     |
| 8      | 21.172               | VB        | 0.4979           | 1972.24915       | 47.89462          | 1.2210     |
| 9      | 22.852               | BB        | 0.1510           | 172.99254        | 15.27656          | 0.1071     |

## Compound 8

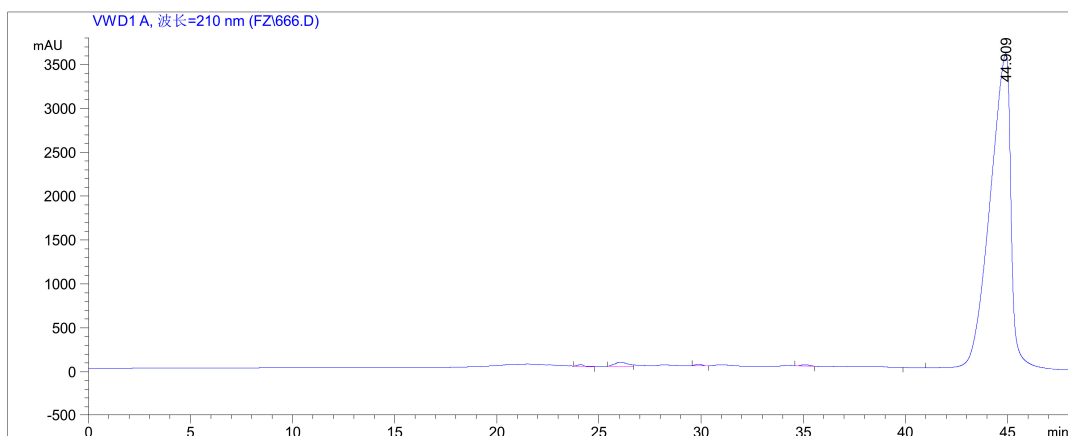

| Peak # | Retention time [min] | Peak type | Peak width [min] | Peak area | Peak height | Peak area% |
|--------|----------------------|-----------|------------------|-----------|-------------|------------|
| 1      | 44.909               | BBA       | 1.0625           | 2.60085e5 | 3607.31494  | 100.0000   |

## Compound 9

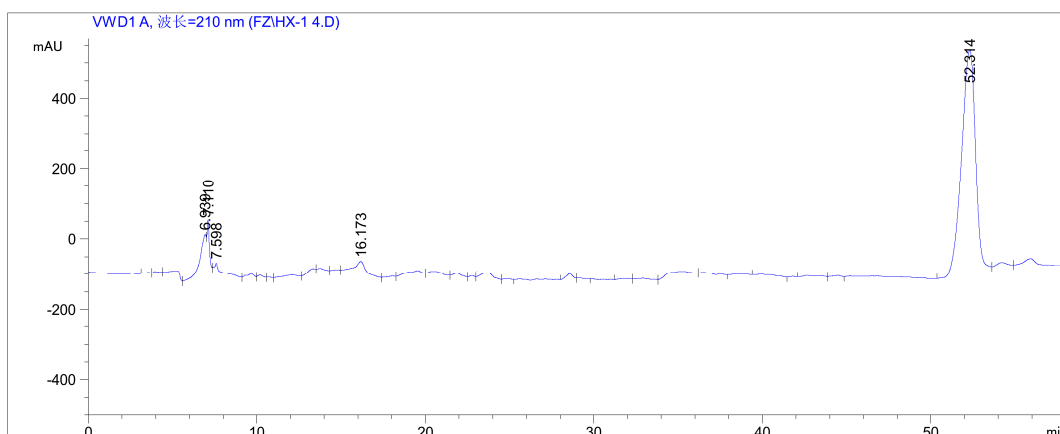

| Peak # | Retention time [min] | Peak type | Peak width [min] | Peak area mAU * s | Peak height [mAU] | Peak area% |
|--------|----------------------|-----------|------------------|-------------------|-------------------|------------|
| 1      | 6.939                | VV        | 0.3935           | 3479.65039        | 132.59836         | 4.0310     |
| 2      | 7.110                | VV        | 0.1749           | 2167.83740        | 173.49944         | 2.5113     |
| 3      | 7.598                | VV        | 0.6026           | 2520.67188        | 50.76414          | 2.9201     |
| 4      | 16.173               | VV        | 1.0148           | 4370.81543        | 54.98335          | 5.0633     |
| 5      | 52.314               | BV        | 0.9017           | 7.37833e4         | 648.77490         | 85.4743    |

**Table S1.** Putative annotation of metabolites produced in the non-cultures of *Phomopsis asparagi* DHS-48 and *Phomopsis* sp. DHS-11, and their co-culture. Annotation/identification was by GNPS, based on the  $m/z$   $[M+H]^+$  or other adducts (specified), predicted molecular formula, fragmentation pattern and spectral data analysis. The source of the compound is indicated as A - co-culture, B - *Phomopsis asparagi* and C - *Phomopsis* sp.

| No. | Compound Hits in Library                                                                             | Structure | Molecular formula (m/z)                  | Parent mass m/z $[M+H]^+$ | MS/MS fragmentation                             | Source | Libraries & IDs                                                                      |
|-----|------------------------------------------------------------------------------------------------------|-----------|------------------------------------------|---------------------------|-------------------------------------------------|--------|--------------------------------------------------------------------------------------|
| A-1 | Sylvestroside I                                                                                      |           | $C_{33}H_{48}O_{19}$<br>$[M+H]^+$        | 748.863                   | 230.7750,<br>299.1690,<br>556.0440,<br>719.5250 | A      | GNPS, CCMSLIB00006469379<br>Dictionary of Natural Products<br>CAS Number: 71431-22-6 |
| A-2 | 5-hydroxy-3-(4-hydroxyphenyl)-10-(2,3,4-trifluorophenyl)-9,10-dihydropyrano[2,3-f]chromene-4,8-dione |           | $C_{24}H_{13}F_3O_6$<br>Na<br>$[M+Na]^+$ | 477.696                   | 313.0430,<br>375.1210,<br>459.0800,<br>476.3120 | C      | GNPS, CCMSLIB00006428870<br>CAS Number: 1574399-17-9                                 |

|      |                                                                                                           |  |                                                           |         |                                                                |         |                                                                                           |
|------|-----------------------------------------------------------------------------------------------------------|--|-----------------------------------------------------------|---------|----------------------------------------------------------------|---------|-------------------------------------------------------------------------------------------|
| A-3  | Guaiacin                                                                                                  |  | $C_{20}H_{24}O_4Na$<br>[M+Na] <sup>+</sup>                | 350.507 | 336.1250,<br>349.1440,<br>350.9870,<br>351.1470                | B       | GNPS, CCMSLIB00006443332<br>Dictionary of Natural Products<br>CAS Number: 36531-08-5      |
| A-4  | 2-(3,4-dihydroxyphenyl)-3,5-dihydroxy-10-(4-(octyloxy)phenyl)-9,10-dihydropyrano[2,3-f]chromene-4,8-dione |  | $C_{32}H_{32}O_9Na$<br>[M+Na] <sup>+</sup>                | 582.485 | 375.1330,<br>419.1100,<br>493.1840,<br>582.8250                | A       | GNPS, CCMSLIB00006428119<br>CAS Number: 1574338-01-4                                      |
| A-5  | Phytosphingosine                                                                                          |  | $C_{18}H_{40}NO_3$<br>[M+H] <sup>+</sup>                  | 318.537 | 264.2682,<br>265.2520,<br>270.2788,<br>282.2783,<br>300.2889   | B       | GNPS, CCMSLIB00003136666<br>Natural Product Atlas,<br>NPA004335<br>CAS Number: 554-62-1   |
| A-6  | 3-Hydroxyoctadecanoic Acid                                                                                |  | $C_{18}H_{35}O_2$<br>[M+H-H <sub>2</sub> O] <sup>+</sup>  | 284.22  | 185.1141,<br>199.1053,<br>213.1945 ,<br>227.1921 ,<br>247.1897 | A, B, C | GNPS, CCMSLIB00003136272<br>Natural Product Atlas,<br>NPA005900<br>CAS Number: 17773-30-7 |
| A-7  | meso-Zeaxanthin                                                                                           |  | $C_{40}H_{56}O_2Na$<br>[M+Na] <sup>+</sup>                | 591.161 | 495.3130 ,<br>555.2940 ,<br>573.3060 ,<br>591.4330             | B       | GNPS, CCMSLIB00006383119<br>PMID:12189420<br>CAS Number: 31272-50-1                       |
| A-8  | O-succinyl-L-homoserine                                                                                   |  | $C_8H_{13}NO_6Na$<br>a<br>[M+Na] <sup>+</sup>             | 241.836 | 197.0420,<br>224.0530                                          | B       | GNPS, CCMSLIB00010103277<br>CAS Number: 1492-23-5                                         |
| A-9  | Cytosine                                                                                                  |  | $C_4H_6N_3O$<br>[M+H] <sup>+</sup>                        | 112.838 | 95.0241,<br>112.0506                                           | B       | GNPS, CCMSLIB00005883678<br>CAS Number: 71-30-7                                           |
| A-10 | Methyl-1,4-benzoquinone                                                                                   |  | $C_7H_7O_2$<br>[M+H] <sup>+</sup>                         | 123.829 | 122.9610,<br>123.0800                                          | A, B, C | GNPS, CCMSLIB00006447359<br>CAS Number: 553-97-9                                          |
| A-11 | Karacoline                                                                                                |  | $C_{22}H_{36}NO_4$<br>[M+H] <sup>+</sup>                  | 379.055 | 378.2100,<br>379.2140                                          | C       | GNPS, CCMSLIB00006499319<br>CAS Number: 39089-30-0                                        |
| A-12 | Ajugasterone C                                                                                            |  | $C_{27}H_{44}O_7Na$<br>[M+Na] <sup>+</sup>                | 503.012 | 503.2860,<br>503.3520                                          | A       | GNPS, CCMSLIB00006465857<br>CAS Number: 23044-80-6                                        |
| A-13 | N-Fructosyl isoleucine                                                                                    |  | $C_{12}H_{22}NO_6$<br>[M+H-H <sub>2</sub> O] <sup>+</sup> | 275.79  | 212.1283,<br>230.1376,<br>258.1294,                            | C       | GNPS, CCMSLIB00005743748                                                                  |

|      |                                                                                                                                                                      |                                                                                     |                                                        |         |                                                 |         |                                                    |
|------|----------------------------------------------------------------------------------------------------------------------------------------------------------------------|-------------------------------------------------------------------------------------|--------------------------------------------------------|---------|-------------------------------------------------|---------|----------------------------------------------------|
|      |                                                                                                                                                                      |                                                                                     |                                                        |         | 276.1454                                        |         |                                                    |
| B-14 | 4-(5-(7-chloro-5'-hydroxy-4,6-dimethoxy-3'-(methoxycarbonyl)-2',7'-dimethyl-3-oxo-7',8'-dihydro-3H,4'H-spiro[benzofuran-2,6'-quinolin]-4'-yl)furan-2-yl)benzoic acid | 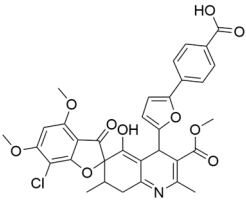   | $C_{33}H_{28}ClNO$<br>$_{10}Na$<br>[M+Na] <sup>+</sup> | 657.006 | 655.2700,<br>655.6950,<br>656.1270,<br>656.2670 | B, C    | GNPS, CCMSLIB00006452823                           |
| B-15 | Hetisine                                                                                                                                                             |    | $C_{20}H_{28}NO$<br>3<br>[M+H] <sup>+</sup>            | 330.779 | 312.1900,<br>330.1700                           | A, C    | GNPS, CCMSLIB00006570203                           |
| B-16 | Oxybutynin[4-(diethylamino)but-2-ynyl 2-cyclohexyl-2-hydroxy-2-phenylacetate                                                                                         |   | $C_{22}H_{34}NO_3$<br>[M+H] <sup>+</sup>               | 358.902 | 124.1110,<br>142.1214,<br>340.2264,<br>358.2378 | A       | GNPS, CCMSLIB00005773582                           |
| B-17 | Dorrestein                                                                                                                                                           |  | $C_{16}H_{21}NO_5S$<br>Na<br>[M+Na] <sup>+</sup>       | 362.936 | 238.0493,<br>362.1053                           | C       | GNPS, CCMSLIB00000078575                           |
| B-18 | (S)-methyl 2-(2-(3-isopropyl-4-oxo-3,4-dihydrophthalazin-1-yl)acetamido)-4-(methylthio)butanoate                                                                     |  | $C_{18}H_{26}N_3O_4$<br>S<br>[M+H] <sup>+</sup>        | 393.062 | 392.1610,<br>393.1640                           | B       | GNPS, CCMSLIB00006532114                           |
| B-19 | Raloxifene                                                                                                                                                           |  | $C_{28}H_{28}NO_4S$<br>[M+H] <sup>+</sup>              | 475.01  | 269.0270,<br>474.1749                           | A, B, C | GNPS, CCMSLIB00006115453<br>CAS Number: 84449-90-1 |
| B-20 | Nodakenin                                                                                                                                                            |  | $C_{20}H_{24}O_9Na$<br>[M+Na] <sup>+</sup>             | 430.976 | 413.2520,<br>431.0950,<br>431.1610              | C       | GNPS, CCMSLIB00006471515                           |

|      |                                                                                              |                                                                                     |                                                    |         |                                                              |         |                                                     |
|------|----------------------------------------------------------------------------------------------|-------------------------------------------------------------------------------------|----------------------------------------------------|---------|--------------------------------------------------------------|---------|-----------------------------------------------------|
| B-21 | 7-hydroxy-3-(4-hydroxyphenyl)-4H-chromen-4-one                                               | 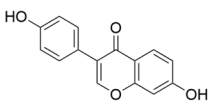   | $C_{15}H_{11}O_4$<br>[M+H] <sup>+</sup>            | 255.959 | 199.0830,<br>255.0700,<br>256.0770                           | A, B, C | GNPS, CCMSLIB00006575950                            |
| B-22 | Etoposide                                                                                    |    | $C_{29}H_{33}O_{13}$<br>[M+H] <sup>+</sup>         | 588.968 | 557.1990,<br>588.4100,<br>588.9120,<br>589.1690              | A       | GNPS, CCMSLIB00006445012                            |
| B-23 | Dopamine-C22:5                                                                               |    | $C_{30}H_{44}NO_3$<br>[M+H] <sup>+</sup>           | 467.332 | 154.0846,<br>334.2428,<br>353.2465,<br>466.3301              | C       | GNPS, CCMSLIB00010011797                            |
| B-24 | N-(1,3-dihydroxy-2-methylpropan-2-yl)-3-methyl-4-oxo-2-phenyl-4H-chromene-8-carboxamide      |    | $C_{21}H_{22}NO_5$<br>[M+H] <sup>+</sup>           | 368.988 | 368.1540,<br>368.1990,<br>369.1550                           | A, C    | GNPS, CCMSLIB00006484105                            |
| B-25 | 2,3-dihydroxypropyl stearate                                                                 |  | $C_{21}H_{42}O_4Na$<br>[M+Na] <sup>+</sup>         | 380.866 | 197.0820,<br>216.0910,<br>238.0720,<br>381.0700              | C       | GNPS, CCMSLIB00006412457                            |
| B-26 | purpurin                                                                                     |  | $C_{23}H_{23}O_6$<br>[M+H] <sup>+</sup>            | 395.073 | 277.5460,<br>377.1430,<br>382.1630,<br>395.1940              | C       | GNPS, CCMSLIB00006391266<br>CAS Number: 75775-33-6  |
| B-27 | Asperuloside                                                                                 |  | $C_{18}H_{22}O_{11}Na$<br>a<br>[M+Na] <sup>+</sup> | 436.827 | 333.0850,<br>351.1240,<br>356.0950,<br>411.1270,<br>437.1080 | B       | GNPS, CCMSLIB00006422914<br>CAS Number: 14259-45-1  |
| B-28 | methyl 2-ethyl-4-[(3R,4R,5S)-5-hydroxy-4,5-dimethyl-2-oxoxolan-3-yl]-2-methyl-3-oxobutanoate |  | $C_{14}H_{22}O_6Na$<br>[M+Na] <sup>+</sup>         | 309.953 | 291.1205,<br>309.1309                                        | C       | GNPS, CCMSLIB00004714908<br>CAS Number: 129514-40-5 |
| C-29 | Docosanol                                                                                    |  | $C_{22}H_{45}O$<br>[M-H] <sup>-</sup>              | 325.19  | 79.9559,<br>119.0490,<br>170.0034,                           | B       | GNPS, CCMSLIB00004702727                            |

|      |                                                                                                    |                                                                                     |                                                               |         |                                                              |         |                                                                 |
|------|----------------------------------------------------------------------------------------------------|-------------------------------------------------------------------------------------|---------------------------------------------------------------|---------|--------------------------------------------------------------|---------|-----------------------------------------------------------------|
|      |                                                                                                    |                                                                                     |                                                               |         | 183.0114,<br>197.1430,<br>325.1842                           |         |                                                                 |
| C-30 | 9-Hydroxy-10E,12Z-octadecadienoic acid                                                             | 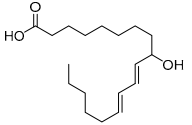   | $C_{18}H_{31}O_3$<br>[M-H] <sup>-</sup>                       | 295.417 | 97.1558,<br>171.1534,<br>195.1563,<br>251.4050,<br>277.3235  | A, B    | GNPS, CCMSLIB00003136732                                        |
| D-31 | Beauvericin                                                                                        |    | $C_{45}H_{57}N_3O_9$<br>Na<br>[M+Na] <sup>+</sup>             | 806.395 | 384.1761,<br>545.2592,<br>645.3112                           | A       | GNPS, CCMSLIB00005723573<br>Natural Product Atlas,<br>NPA001888 |
| E-32 | 2(3H)-Furanone, 5-[4-[1-(acetyloxy)-4-oxo-5-(2-penten-1-yl)-2-cyclopenten-1-yl]butyl]dihydro-(ACI) |    | $C_{20}H_{28}O_5Na$<br>[M+Na] <sup>+</sup>                    | 371.034 | 311.1626,<br>372.1873                                        | B       | GNPS, CCMSLIB00000852834                                        |
| F-33 | Chlordiazepoxide                                                                                   |  | $C_{16}H_{13}ClN_3$<br>O<br>[M-H] <sup>-</sup>                | 297.421 | 221.0719,<br>241.0300,<br>249.0669,<br>253.0538,<br>254.0615 | A       | GNPS, CCMSLIB00005733539<br>CAS Number: 58-25-3                 |
| G-34 | Hydroxygardnutine                                                                                  |  | $C_{21}H_{23}N_2O_5$<br>[M+COOH]<br>-                         | 383.533 | 337.1543,<br>338.1487,<br>338.1639,<br>339.1542              | A, B, C | GNPS, CCMSLIB00005744488                                        |
| H-35 | Undecylprodigiosin                                                                                 |  | $C_{25}H_{36}N_3O$<br>[M+H] <sup>+</sup>                      | 393.307 | 238.0968,<br>239.1039,<br>379.2613,<br>394.2581              | A       | GNPS, CCMSLIB00005724040                                        |
| I-36 | Aconitine                                                                                          |  | $C_{34}H_{48}NO_{11}$<br>[M+H] <sup>+</sup>                   | 646.997 | 646.3810,<br>647.3810,<br>647.4010                           | A       | GNPS, CCMSLIB00006507956                                        |
| J-37 | 2-((11aS)-5-(4-fluorophenyl)-1,3-dioxo-11,11a-dihydro-1H-imidazo[1',5':1,6]                        |  | $C_{34}H_{35}FN_4O$<br><sub>3</sub> Na<br>[M+Na] <sup>+</sup> | 590.056 | 589.2600,<br>589.4220,<br>590.2530,<br>590.2800,<br>591.2630 | B       | GNPS, CCMSLIB00006536412<br>CAS Number: 956918-50-6             |



|      |                                                                                                                                                                                                              |                                                                                   |                                        |         |                              |   |                                                              |
|------|--------------------------------------------------------------------------------------------------------------------------------------------------------------------------------------------------------------|-----------------------------------------------------------------------------------|----------------------------------------|---------|------------------------------|---|--------------------------------------------------------------|
|      | pyrido[3,4-b]indol-2(3H,5H,6H)-yl)-N-(6-methylheptan-2-yl)benzamide                                                                                                                                          |                                                                                   |                                        |         |                              |   |                                                              |
| J-38 | Spiro[2H-furo[2,3-e]isoidole-2,1'(2'H)-naphthalene]-7(3H)-butanoic acid, 3',4',4'a,5',6,6',7',8,8',8'a-decahydro-4,6',7'-trihydroxy-2',5',5',8'a-tetramethyl-6-oxo-, (1'R,2'R,4'aS,6'S,7'R,8'aS)- (9CI, ACI) | 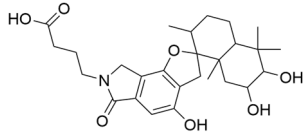 | $C_{27}H_{37}NO_7$<br>Na<br>$[M+Na]^+$ | 511.127 | 510.0832, 511.0973, 511.2525 | B | GNPS, CCMSLIB00000851579<br>Natural Product Atlas, NPA008246 |

**Table S2.** Gibbs free energies<sup>a</sup> and equilibrium populations<sup>b</sup> of low-energy conformers of phomoxanthone L (**1**)

| Conformers                                                                                        | In MeOH           |                      |
|---------------------------------------------------------------------------------------------------|-------------------|----------------------|
|                                                                                                   | $G^a$             | $P$ (%) <sup>b</sup> |
| 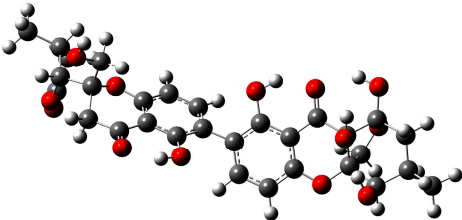<br><b>1-1</b> | -1342070.06533743 | 59.01                |
| <br><b>1-2</b> | -1342069.80241074 | 37.85                |

|                                                                                                                          |                   |      |
|--------------------------------------------------------------------------------------------------------------------------|-------------------|------|
| 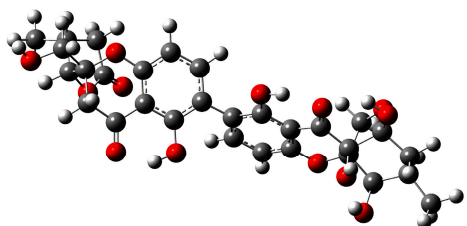 <p style="text-align: center;">1-3</p> | -1342068.22798815 | 2.65 |
|  <p style="text-align: center;">1-4</p> | -1342067.2271097  | 0.49 |

<sup>a</sup>B3LYP/6-31G(d,p), in kcal/mol. <sup>b</sup>From *G* values at 298.15K.

**Table S3.** Cartesian coordinates for the low-energy reoptimized MMFF conformers of phomoxanthone L (1) at B3LYP/6-31G(d,p) level of theory in gas

| 1-1              |                  | Standard Orientation<br>(Ångstroms) |           |           |           |
|------------------|------------------|-------------------------------------|-----------|-----------|-----------|
| Center<br>number | Atomic<br>number | Atomic<br>Type                      | X         | Y         | Z         |
| 1.               | 6.               | 0.                                  | -0.558556 | 0.514664  | -0.469617 |
| 2.               | 6.               | 0.                                  | -1.044212 | 1.653112  | -1.133430 |
| 3.               | 6.               | 0.                                  | -2.398926 | 1.932471  | -1.294050 |
| 4.               | 6.               | 0.                                  | -3.339299 | 1.054799  | -0.768878 |
| 5.               | 6.               | 0.                                  | -2.915451 | -0.104713 | -0.064043 |
| 6.               | 6.               | 0.                                  | -1.513062 | -0.367952 | 0.070852  |
| 7.               | 8.               | 0.                                  | -4.644949 | 1.356064  | -0.965429 |
| 8.               | 6.               | 0.                                  | -5.634940 | 0.372300  | -0.660086 |
| 9.               | 6.               | 0.                                  | -5.341927 | -0.487448 | 0.572878  |
| 10.              | 6.               | 0.                                  | -3.881589 | -0.962663 | 0.564517  |
| 11.              | 6.               | 0.                                  | -6.994411 | 1.103268  | -0.547839 |
| 12.              | 6.               | 0.                                  | -8.147427 | 0.061522  | -0.427622 |
| 13.              | 6.               | 0.                                  | -7.801324 | -1.088778 | 0.537747  |
| 14.              | 8.               | 0.                                  | -3.578748 | -2.009008 | 1.183481  |
| 15.              | 8.               | 0.                                  | -1.101685 | -1.459152 | 0.731909  |
| 16.              | 6.               | 0.                                  | -9.469939 | 0.741062  | -0.062260 |
| 17.              | 8.               | 0.                                  | -6.989477 | 2.083641  | 0.469311  |
| 18.              | 6.               | 0.                                  | -5.685819 | -0.746861 | -1.737860 |
| 19.              | 8.               | 0.                                  | -6.151816 | -1.927626 | -1.069830 |
| 20.              | 6.               | 0.                                  | -6.378262 | -1.619051 | 0.325486  |
| 21.              | 8.               | 0.                                  | -5.536982 | 0.186920  | 1.813695  |
| 22.              | 8.               | 0.                                  | -6.211487 | -2.736657 | 1.118328  |

|     |    |    |            |           |           |
|-----|----|----|------------|-----------|-----------|
| 23. | 6. | 0. | 2.802805   | -1.301514 | -0.497393 |
| 24. | 6. | 0. | 3.679109   | -0.289418 | -0.127242 |
| 25. | 6. | 0. | 3.196492   | 1.013947  | 0.128034  |
| 26. | 6. | 0. | 1.798710   | 1.276323  | 0.027632  |
| 27. | 6. | 0. | 0.899249   | 0.253687  | -0.346356 |
| 28. | 6. | 0. | 1.442301   | -1.012963 | -0.602855 |
| 29. | 8. | 0. | 5.003693   | -0.607077 | -0.035368 |
| 30. | 6. | 0. | 5.896052   | 0.279101  | 0.680847  |
| 31. | 6. | 0. | 5.598894   | 1.748744  | 0.355029  |
| 32. | 6. | 0. | 4.127661   | 2.085025  | 0.436880  |
| 33. | 8. | 0. | 3.758586   | 3.241036  | 0.702108  |
| 34. | 8. | 0. | 1.336359   | 2.506676  | 0.283599  |
| 35. | 6. | 0. | 5.714811   | -0.005217 | 2.187308  |
| 36. | 8. | 0. | 6.683796   | 0.757763  | 2.892610  |
| 37. | 6. | 0. | 7.323255   | -0.102107 | 0.234722  |
| 38. | 6. | 0. | 7.656287   | -1.621623 | 0.248429  |
| 39. | 6. | 0. | 7.475676   | -2.019103 | -1.224378 |
| 40. | 6. | 0. | 7.588773   | -0.716812 | -1.999116 |
| 41. | 8. | 0. | 7.540647   | 0.335395  | -1.121466 |
| 42. | 8. | 0. | 7.707179   | -0.550411 | -3.182809 |
| 43. | 6. | 0. | 9.079791   | -1.871426 | 0.761502  |
| 44. | 1. | 0. | 8.013977   | 0.462284  | 0.865506  |
| 45. | 1. | 0. | 6.947214   | -2.161659 | 0.880041  |
| 46. | 1. | 0. | -0.322058  | 2.347184  | -1.546572 |
| 47. | 1. | 0. | -2.736465  | 2.812025  | -1.828858 |
| 48. | 1. | 0. | -7.133231  | 1.659092  | -1.483546 |
| 49. | 1. | 0. | -8.265815  | -0.386535 | -1.421446 |
| 50. | 1. | 0. | -7.902240  | -0.766767 | 1.579758  |
| 51. | 1. | 0. | -8.486820  | -1.928952 | 0.392280  |
| 52. | 1. | 0. | -1.909634  | -1.936330 | 1.049313  |
| 53. | 1. | 0. | -9.394634  | 1.247653  | 0.903032  |
| 54. | 1. | 0. | -10.279640 | 0.006127  | -0.010140 |
| 55. | 1. | 0. | -9.744081  | 1.494754  | -0.807543 |
| 56. | 1. | 0. | -6.658132  | 1.664294  | 1.278518  |
| 57. | 1. | 0. | -6.355516  | -0.481135 | -2.562741 |
| 58. | 1. | 0. | -4.688048  | -0.927761 | -2.153439 |
| 59. | 1. | 0. | -5.583024  | -0.498100 | 2.499182  |
| 60. | 1. | 0. | -5.258039  | -2.940640 | 1.141797  |
| 61. | 1. | 0. | 3.183863   | -2.297418 | -0.690371 |
| 62. | 1. | 0. | 0.765960   | -1.811846 | -0.883590 |
| 63. | 1. | 0. | 6.154207   | 2.400108  | 1.033149  |
| 64. | 1. | 0. | 5.930702   | 1.966387  | -0.666786 |
| 65. | 1. | 0. | 2.127075   | 3.067228  | 0.518002  |

|     |    |    |          |           |           |
|-----|----|----|----------|-----------|-----------|
| 66. | 1. | 0. | 5.833377 | -1.082403 | 2.367443  |
| 67. | 1. | 0. | 4.690927 | 0.265696  | 2.478290  |
| 68. | 1. | 0. | 6.461779 | 0.746094  | 3.831563  |
| 69. | 1. | 0. | 8.220976 | -2.730215 | -1.589283 |
| 70. | 1. | 0. | 6.485229 | -2.438501 | -1.422828 |
| 71. | 1. | 0. | 9.817290 | -1.334928 | 0.153743  |
| 72. | 1. | 0. | 9.188896 | -1.533389 | 1.797024  |
| 73. | 1. | 0. | 9.326633 | -2.937097 | 0.724349  |

| 1-2              |                | Standard Orientation<br>(Ångstroms) |           |           |           |
|------------------|----------------|-------------------------------------|-----------|-----------|-----------|
| Center<br>number | Atom<br>number | Type                                | X         | Y         | Z         |
| 1.               | 6.             | 0.                                  | -0.565846 | -0.710699 | -0.316862 |
| 2.               | 6.             | 0.                                  | -1.074142 | -2.018264 | -0.383030 |
| 3.               | 6.             | 0.                                  | -2.432354 | -2.321518 | -0.340925 |
| 4.               | 6.             | 0.                                  | -3.354460 | -1.288213 | -0.232555 |
| 5.               | 6.             | 0.                                  | -2.910029 | 0.061024  | -0.187182 |
| 6.               | 6.             | 0.                                  | -1.503620 | 0.335826  | -0.216836 |
| 7.               | 8.             | 0.                                  | -4.663558 | -1.630444 | -0.174247 |
| 8.               | 6.             | 0.                                  | -5.619879 | -0.634891 | 0.192834  |
| 9.               | 6.             | 0.                                  | -5.342186 | 0.768254  | -0.354456 |
| 10.              | 6.             | 0.                                  | -3.863413 | 1.137003  | -0.161755 |
| 11.              | 6.             | 0.                                  | -7.013978 | -1.156860 | -0.228639 |
| 12.              | 6.             | 0.                                  | -8.123020 | -0.220443 | 0.336355  |
| 13.              | 6.             | 0.                                  | -7.772018 | 1.269880  | 0.166122  |
| 14.              | 8.             | 0.                                  | -3.541039 | 2.344901  | -0.090027 |
| 15.              | 8.             | 0.                                  | -1.072669 | 1.603073  | -0.154637 |
| 16.              | 6.             | 0.                                  | -9.491385 | -0.562174 | -0.259631 |
| 17.              | 8.             | 0.                                  | -7.099647 | -1.381951 | -1.621104 |
| 18.              | 6.             | 0.                                  | -5.574009 | -0.321330 | 1.715544  |
| 19.              | 8.             | 0.                                  | -6.013237 | 1.037228  | 1.858408  |
| 20.              | 6.             | 0.                                  | -6.317784 | 1.572250  | 0.549419  |
| 21.              | 8.             | 0.                                  | -5.617181 | 0.918429  | -1.745819 |
| 22.              | 8.             | 0.                                  | -6.139215 | 2.940560  | 0.513505  |
| 23.              | 6.             | 0.                                  | 2.816217  | 0.837369  | -1.199778 |
| 24.              | 6.             | 0.                                  | 3.690543  | 0.064030  | -0.447270 |
| 25.              | 6.             | 0.                                  | 3.196225  | -0.968867 | 0.380999  |
| 26.              | 6.             | 0.                                  | 1.794430  | -1.225817 | 0.420661  |
| 27.              | 6.             | 0.                                  | 0.896848  | -0.449089 | -0.345881 |
| 28.              | 6.             | 0.                                  | 1.448357  | 0.572305  | -1.132317 |

|     |    |    |            |           |           |
|-----|----|----|------------|-----------|-----------|
| 29. | 8. | 0. | 5.022420   | 0.350456  | -0.538534 |
| 30. | 6. | 0. | 5.988589   | -0.623522 | -0.077173 |
| 31. | 6. | 0. | 5.547517   | -1.255484 | 1.249064  |
| 32. | 6. | 0. | 4.106557   | -1.711304 | 1.235312  |
| 33. | 8. | 0. | 3.732158   | -2.640539 | 1.969906  |
| 34. | 8. | 0. | 1.325064   | -2.204436 | 1.205176  |
| 35. | 6. | 0. | 6.129702   | -1.689812 | -1.184245 |
| 36. | 8. | 0. | 7.172185   | -2.576393 | -0.802872 |
| 37. | 6. | 0. | 7.318123   | 0.141202  | 0.096219  |
| 38. | 6. | 0. | 7.727429   | 1.071187  | -1.082201 |
| 39. | 6. | 0. | 7.275539   | 2.454139  | -0.589637 |
| 40. | 6. | 0. | 7.176213   | 2.318142  | 0.920554  |
| 41. | 8. | 0. | 7.243886   | 0.990753  | 1.258090  |
| 42. | 8. | 0. | 7.059580   | 3.178317  | 1.750577  |
| 43. | 6. | 0. | 9.236541   | 0.997208  | -1.344785 |
| 44. | 1. | 0. | 8.088253   | -0.606859 | 0.298744  |
| 45. | 1. | 0. | 7.189723   | 0.793918  | -1.991805 |
| 46. | 1. | 0. | -0.366718  | -2.835728 | -0.453453 |
| 47. | 1. | 0. | -2.786040  | -3.344788 | -0.378848 |
| 48. | 1. | 0. | -7.134565  | -2.145432 | 0.231882  |
| 49. | 1. | 0. | -8.171868  | -0.410914 | 1.415053  |
| 50. | 1. | 0. | -7.936670  | 1.594188  | -0.867176 |
| 51. | 1. | 0. | -8.410917  | 1.888721  | 0.803116  |
| 52. | 1. | 0. | -1.869747  | 2.186723  | -0.084166 |
| 53. | 1. | 0. | -9.484618  | -0.441252 | -1.345631 |
| 54. | 1. | 0. | -10.267730 | 0.085251  | 0.160592  |
| 55. | 1. | 0. | -9.765240  | -1.600732 | -0.047023 |
| 56. | 1. | 0. | -6.782302  | -0.580783 | -2.066270 |
| 57. | 1. | 0. | -6.221267  | -0.997449 | 2.284266  |
| 58. | 1. | 0. | -4.553356  | -0.421048 | 2.101227  |
| 59. | 1. | 0. | -5.679927  | 1.871811  | -1.914971 |
| 60. | 1. | 0. | -5.180423  | 3.113148  | 0.560346  |
| 61. | 1. | 0. | 3.206309   | 1.624246  | -1.834566 |
| 62. | 1. | 0. | 0.775674   | 1.182868  | -1.722665 |
| 63. | 1. | 0. | 6.190309   | -2.104727 | 1.490254  |
| 64. | 1. | 0. | 5.650850   | -0.517429 | 2.052872  |
| 65. | 1. | 0. | 2.112589   | -2.599351 | 1.673156  |
| 66. | 1. | 0. | 6.346475   | -1.190989 | -2.138810 |
| 67. | 1. | 0. | 5.169891   | -2.212246 | -1.295944 |
| 68. | 1. | 0. | 7.152485   | -3.345012 | -1.385908 |
| 69. | 1. | 0. | 7.962751   | 3.265346  | -0.842277 |
| 70. | 1. | 0. | 6.283799   | 2.723077  | -0.964305 |
| 71. | 1. | 0. | 9.805813   | 1.260550  | -0.446095 |

|     |    |    |          |           |           |
|-----|----|----|----------|-----------|-----------|
| 72. | 1. | 0. | 9.533460 | -0.012711 | -1.645358 |
| 73. | 1. | 0. | 9.528779 | 1.688777  | -2.141179 |

| 1-3              |                | Standard Orientation<br>(Ångstroms) |           |           |           |
|------------------|----------------|-------------------------------------|-----------|-----------|-----------|
| Center<br>number | Atom<br>number | Type                                | X         | Y         | Z         |
| 1.               | 6.             | 0.                                  | -0.296059 | -0.272941 | -0.009980 |
| 2.               | 6.             | 0.                                  | -0.642981 | -1.633528 | 0.029197  |
| 3.               | 6.             | 0.                                  | -1.957191 | -2.092562 | 0.077254  |
| 4.               | 6.             | 0.                                  | -2.998216 | -1.172842 | 0.076987  |
| 5.               | 6.             | 0.                                  | -2.717029 | 0.219887  | 0.022837  |
| 6.               | 6.             | 0.                                  | -1.352480 | 0.657664  | -0.010177 |
| 7.               | 8.             | 0.                                  | -4.259601 | -1.664383 | 0.133859  |
| 8.               | 6.             | 0.                                  | -5.343286 | -0.764342 | 0.369563  |
| 9.               | 6.             | 0.                                  | -5.203175 | 0.613010  | -0.285032 |
| 10.              | 6.             | 0.                                  | -3.788372 | 1.171102  | -0.074876 |
| 11.              | 6.             | 0.                                  | -6.644241 | -1.481801 | -0.064712 |
| 12.              | 6.             | 0.                                  | -7.883246 | -0.639454 | 0.364778  |
| 13.              | 6.             | 0.                                  | -7.694660 | 0.865216  | 0.088448  |
| 14.              | 8.             | 0.                                  | -3.614038 | 2.411886  | -0.103683 |
| 15.              | 8.             | 0.                                  | -1.077067 | 1.968701  | -0.060313 |
| 16.              | 6.             | 0.                                  | -9.167529 | -1.183124 | -0.267346 |
| 17.              | 8.             | 0.                                  | -6.627953 | -1.832612 | -1.432922 |
| 18.              | 6.             | 0.                                  | -5.414043 | -0.326927 | 1.859750  |
| 19.              | 8.             | 0.                                  | -6.013879 | 0.976071  | 1.868849  |
| 20.              | 6.             | 0.                                  | -6.307555 | 1.366506  | 0.506936  |
| 21.              | 8.             | 0.                                  | -5.426912 | 0.613402  | -1.693423 |
| 22.              | 8.             | 0.                                  | -6.283594 | 2.739419  | 0.364686  |
| 23.              | 6.             | 0.                                  | 2.926905  | 1.639869  | 0.734611  |
| 24.              | 6.             | 0.                                  | 3.831684  | 1.015619  | -0.115167 |
| 25.              | 6.             | 0.                                  | 3.408822  | -0.030172 | -0.962678 |
| 26.              | 6.             | 0.                                  | 2.052431  | -0.461227 | -0.921064 |
| 27.              | 6.             | 0.                                  | 1.123364  | 0.163694  | -0.057815 |
| 28.              | 6.             | 0.                                  | 1.599582  | 1.208406  | 0.744410  |
| 29.              | 8.             | 0.                                  | 5.120450  | 1.472016  | -0.091815 |
| 30.              | 6.             | 0.                                  | 6.181869  | 0.709896  | -0.712981 |
| 31.              | 6.             | 0.                                  | 5.706400  | 0.027232  | -2.005103 |
| 32.              | 6.             | 0.                                  | 4.343416  | -0.624498 | -1.901188 |
| 33.              | 8.             | 0.                                  | 4.037930  | -1.553840 | -2.662375 |
| 34.              | 8.             | 0.                                  | 1.648749  | -1.455351 | -1.720793 |

|     |    |    |            |           |           |
|-----|----|----|------------|-----------|-----------|
| 35. | 6. | 0. | 7.234128   | 1.786145  | -1.032772 |
| 36. | 8. | 0. | 8.346738   | 1.144502  | -1.636650 |
| 37. | 6. | 0. | 6.774743   | -0.310077 | 0.286124  |
| 38. | 6. | 0. | 6.989433   | 0.207501  | 1.737992  |
| 39. | 6. | 0. | 5.829731   | -0.441209 | 2.508822  |
| 40. | 6. | 0. | 5.373049   | -1.601456 | 1.639973  |
| 41. | 8. | 0. | 5.920009   | -1.467926 | 0.390020  |
| 42. | 8. | 0. | 4.645513   | -2.514486 | 1.921345  |
| 43. | 6. | 0. | 8.365200   | -0.200968 | 2.278442  |
| 44. | 1. | 0. | 7.715350   | -0.656450 | -0.151308 |
| 45. | 1. | 0. | 6.899713   | 1.295916  | 1.763643  |
| 46. | 1. | 0. | 0.158581   | -2.362526 | 0.025656  |
| 47. | 1. | 0. | -2.185414  | -3.150604 | 0.122537  |
| 48. | 1. | 0. | -6.675055  | -2.435189 | 0.477520  |
| 49. | 1. | 0. | -7.973973  | -0.751841 | 1.451929  |
| 50. | 1. | 0. | -7.839186  | 1.086387  | -0.974540 |
| 51. | 1. | 0. | -8.433787  | 1.451148  | 0.642922  |
| 52. | 1. | 0. | -1.940698  | 2.453497  | -0.074618 |
| 53. | 1. | 0. | -9.113760  | -1.142114 | -1.358072 |
| 54. | 1. | 0. | -10.035160 | -0.602873 | 0.062932  |
| 55. | 1. | 0. | -9.332391  | -2.228405 | 0.013590  |
| 56. | 1. | 0. | -6.383591  | -1.039635 | -1.935030 |
| 57. | 1. | 0. | -6.006641  | -1.028230 | 2.456879  |
| 58. | 1. | 0. | -4.409333  | -0.273056 | 2.294137  |
| 59. | 1. | 0. | -5.566971  | 1.537542  | -1.953280 |
| 60. | 1. | 0. | -5.352340  | 3.023509  | 0.424332  |
| 61. | 1. | 0. | 3.262454   | 2.446702  | 1.375873  |
| 62. | 1. | 0. | 0.901417   | 1.703594  | 1.408791  |
| 63. | 1. | 0. | 5.624300   | 0.783093  | -2.797866 |
| 64. | 1. | 0. | 6.433317   | -0.711098 | -2.346615 |
| 65. | 1. | 0. | 2.444965   | -1.744515 | -2.245549 |
| 66. | 1. | 0. | 7.514450   | 2.310128  | -0.107994 |
| 67. | 1. | 0. | 6.764631   | 2.521817  | -1.700524 |
| 68. | 1. | 0. | 8.982728   | 1.819866  | -1.902081 |
| 69. | 1. | 0. | 6.102815   | -0.807200 | 3.501446  |
| 70. | 1. | 0. | 4.975874   | 0.233608  | 2.628730  |
| 71. | 1. | 0. | 8.486102   | -1.290212 | 2.267619  |
| 72. | 1. | 0. | 9.169464   | 0.229857  | 1.673231  |
| 73. | 1. | 0. | 8.497216   | 0.140376  | 3.310022  |

|     |                                     |
|-----|-------------------------------------|
| 1-4 | Standard Orientation<br>(Ångstroms) |
|-----|-------------------------------------|

| Center<br>number | Atom<br>number | Type | X         | Y         | Z         |
|------------------|----------------|------|-----------|-----------|-----------|
| 1.               | 6.             | 0.   | -0.505109 | -0.761861 | -0.303708 |
| 2.               | 6.             | 0.   | -1.032043 | -2.063439 | -0.316112 |
| 3.               | 6.             | 0.   | -2.394549 | -2.346080 | -0.254272 |
| 4.               | 6.             | 0.   | -3.301757 | -1.297306 | -0.181384 |
| 5.               | 6.             | 0.   | -2.838438 | 0.046710  | -0.189627 |
| 6.               | 6.             | 0.   | -1.428250 | 0.300333  | -0.237586 |
| 7.               | 8.             | 0.   | -4.616074 | -1.618662 | -0.104658 |
| 8.               | 6.             | 0.   | -5.555284 | -0.596903 | 0.231223  |
| 9.               | 6.             | 0.   | -5.261338 | 0.780990  | -0.369038 |
| 10.              | 6.             | 0.   | -3.776197 | 1.135687  | -0.199872 |
| 11.              | 6.             | 0.   | -6.959837 | -1.113379 | -0.161878 |
| 12.              | 6.             | 0.   | -8.051678 | -0.140886 | 0.374774  |
| 13.              | 6.             | 0.   | -7.680190 | 1.336681  | 0.148113  |
| 14.              | 8.             | 0.   | -3.438021 | 2.341558  | -0.176917 |
| 15.              | 8.             | 0.   | -0.979915 | 1.563117  | -0.225752 |
| 16.              | 6.             | 0.   | -9.428453 | -0.483821 | -0.200942 |
| 17.              | 8.             | 0.   | -7.058698 | -1.387423 | -1.544809 |
| 18.              | 6.             | 0.   | -5.494542 | -0.227974 | 1.740896  |
| 19.              | 8.             | 0.   | -5.913819 | 1.141164  | 1.836642  |
| 20.              | 6.             | 0.   | -6.219110 | 1.631859  | 0.510495  |
| 21.              | 8.             | 0.   | -5.544529 | 0.884095  | -1.763244 |
| 22.              | 8.             | 0.   | -6.020869 | 2.995218  | 0.422643  |
| 23.              | 6.             | 0.   | 2.889281  | 0.699802  | -1.275019 |
| 24.              | 6.             | 0.   | 3.757729  | -0.052892 | -0.494792 |
| 25.              | 6.             | 0.   | 3.256230  | -1.038761 | 0.379067  |
| 26.              | 6.             | 0.   | 1.855011  | -1.279896 | 0.435015  |
| 27.              | 6.             | 0.   | 0.960590  | -0.521141 | -0.353468 |
| 28.              | 6.             | 0.   | 1.518675  | 0.457671  | -1.187401 |
| 29.              | 8.             | 0.   | 5.091048  | 0.226217  | -0.604188 |
| 30.              | 6.             | 0.   | 6.083334  | -0.676967 | -0.064621 |
| 31.              | 6.             | 0.   | 5.606648  | -1.313193 | 1.251554  |
| 32.              | 6.             | 0.   | 4.167008  | -1.778211 | 1.231969  |
| 33.              | 8.             | 0.   | 3.796596  | -2.685026 | 1.993418  |
| 34.              | 8.             | 0.   | 1.379124  | -2.227352 | 1.255536  |
| 35.              | 6.             | 0.   | 6.421986  | -1.747793 | -1.115164 |
| 36.              | 8.             | 0.   | 5.343880  | -2.661083 | -1.199812 |
| 37.              | 6.             | 0.   | 7.335108  | 0.201660  | 0.181808  |
| 38.              | 6.             | 0.   | 7.769930  | 1.120431  | -0.998797 |
| 39.              | 6.             | 0.   | 7.159721  | 2.474968  | -0.608180 |
| 40.              | 6.             | 0.   | 6.948993  | 2.387792  | 0.893410  |
| 41.              | 8.             | 0.   | 7.099867  | 1.082069  | 1.293409  |



|     |    |    |            |           |           |
|-----|----|----|------------|-----------|-----------|
| 42. | 8. | 0. | 6.696915   | 3.262735  | 1.675144  |
| 43. | 6. | 0. | 9.297567   | 1.177965  | -1.125270 |
| 44. | 1. | 0. | 8.149984   | -0.464995 | 0.484594  |
| 45. | 1. | 0. | 7.341879   | 0.763335  | -1.938055 |
| 46. | 1. | 0. | -0.335661  | -2.892201 | -0.358787 |
| 47. | 1. | 0. | -2.762037  | -3.365215 | -0.250805 |
| 48. | 1. | 0. | -7.091358  | -2.082693 | 0.335162  |
| 49. | 1. | 0. | -8.097256  | -0.291418 | 1.459937  |
| 50. | 1. | 0. | -7.847316  | 1.625818  | -0.895249 |
| 51. | 1. | 0. | -8.305623  | 1.987673  | 0.766211  |
| 52. | 1. | 0. | -1.768342  | 2.159786  | -0.173443 |
| 53. | 1. | 0. | -9.426311  | -0.402217 | -1.290629 |
| 54. | 1. | 0. | -10.192930 | 0.189560  | 0.199895  |
| 55. | 1. | 0. | -9.715938  | -1.509995 | 0.050447  |
| 56. | 1. | 0. | -6.731131  | -0.608030 | -2.020296 |
| 57. | 1. | 0. | -6.146976  | -0.873352 | 2.338695  |
| 58. | 1. | 0. | -4.472453  | -0.327621 | 2.122600  |
| 59. | 1. | 0. | -5.590485  | 1.831535  | -1.967353 |
| 60. | 1. | 0. | -5.058814  | 3.153876  | 0.452748  |
| 61. | 1. | 0. | 3.285424   | 1.452662  | -1.946382 |
| 62. | 1. | 0. | 0.849924   | 1.051952  | -1.798563 |
| 63. | 1. | 0. | 6.243027   | -2.156599 | 1.530710  |
| 64. | 1. | 0. | 5.681151   | -0.564704 | 2.048858  |
| 65. | 1. | 0. | 2.167187   | -2.628142 | 1.715731  |
| 66. | 1. | 0. | 7.352472   | -2.251882 | -0.806513 |
| 67. | 1. | 0. | 6.605226   | -1.256612 | -2.080327 |
| 68. | 1. | 0. | 5.531403   | -3.300732 | -1.897696 |
| 69. | 1. | 0. | 7.792592   | 3.334330  | -0.842550 |
| 70. | 1. | 0. | 6.182811   | 2.636478  | -1.071924 |
| 71. | 1. | 0. | 9.757843   | 1.517973  | -0.190741 |
| 72. | 1. | 0. | 9.715200   | 0.194444  | -1.365601 |
| 73. | 1. | 0. | 9.596253   | 1.871674  | -1.917116 |

**Table S4.** Gibbs free energies<sup>a</sup> and equilibrium populations<sup>b</sup> of low-energy conformers of phomoxanthone M (2)

| Conformers                                                                          | In MeOH           |                      |
|-------------------------------------------------------------------------------------|-------------------|----------------------|
|                                                                                     | $G^a$             | $P$ (%) <sup>b</sup> |
| 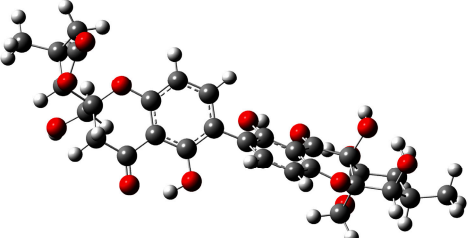 | -1342069.61980533 | 29.44                |

|                                                                                    |                   |       |
|------------------------------------------------------------------------------------|-------------------|-------|
| 2-1                                                                                |                   |       |
| 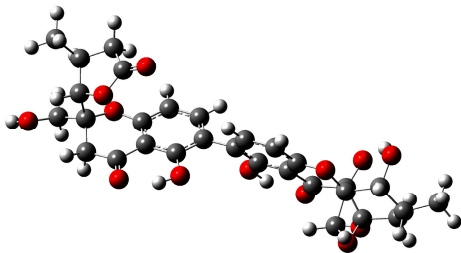  | -1342069.89026214 | 46.49 |
| 2-2                                                                                |                   |       |
|   | -1342067.9173707  | 1.66  |
| 2-3                                                                                |                   |       |
|  | -1342069.45853526 | 22.42 |
| 2-4                                                                                |                   |       |

<sup>a</sup>B3LYP/6-31G(d,p), in kcal/mol. <sup>b</sup>From *G* values at 298.15K.

**Table S5.** Cartesian coordinates for the low-energy reoptimized MMFF conformers of phomoxanthone M (2) at B3LYP/6-31G(d,p) level of theory in gas

| 2-1              |                  | Standard Orientation<br>(Ångstroms) |          |           |           |
|------------------|------------------|-------------------------------------|----------|-----------|-----------|
| Center<br>number | Atomic<br>number | Atomic<br>Type                      | X        | Y         | Z         |
| 1.               | 6.               | 0.                                  | 0.559666 | 0.585643  | -0.412052 |
| 2.               | 6.               | 0.                                  | 1.048955 | 1.830053  | -0.842183 |
| 3.               | 6.               | 0.                                  | 2.403934 | 2.142166  | -0.915966 |
| 4.               | 6.               | 0.                                  | 3.341653 | 1.182553  | -0.555320 |
| 5.               | 6.               | 0.                                  | 2.915185 | -0.106105 | -0.133310 |
| 6.               | 6.               | 0.                                  | 1.512120 | -0.386731 | -0.051463 |
| 7.               | 8.               | 0.                                  | 4.647204 | 1.535543  | -0.625396 |
| 8.               | 6.               | 0.                                  | 5.626907 | 0.677866  | -0.037980 |
| 9.               | 6.               | 0.                                  | 5.348680 | -0.821797 | -0.178090 |
| 10.              | 6.               | 0.                                  | 3.881363 | -1.129738 | 0.156237  |
| 11.              | 6.               | 0.                                  | 7.000439 | 1.070712  | -0.632822 |
| 12.              | 6.               | 0.                                  | 8.139380 | 0.321304  | 0.120953  |

|     |    |    |           |           |           |
|-----|----|----|-----------|-----------|-----------|
| 13. | 6. | 0. | 7.799159  | -1.160539 | 0.372067  |
| 14. | 8. | 0. | 3.575909  | -2.273624 | 0.565585  |
| 15. | 8. | 0. | 1.099157  | -1.591554 | 0.366990  |
| 16. | 6. | 0. | 9.481184  | 0.489827  | -0.597130 |
| 17. | 8. | 0. | 7.035135  | 0.915488  | -2.036746 |
| 18. | 6. | 0. | 5.635054  | 0.785215  | 1.513187  |
| 19. | 8. | 0. | 6.097835  | -0.482636 | 2.000735  |
| 20. | 6. | 0. | 6.362765  | -1.350647 | 0.873990  |
| 21. | 8. | 0. | 5.579649  | -1.339033 | -1.486899 |
| 22. | 8. | 0. | 6.196902  | -2.678142 | 1.214423  |
| 23. | 6. | 0. | -2.807258 | -1.187120 | -0.766827 |
| 24. | 6. | 0. | -3.679350 | -0.260266 | -0.210735 |
| 25. | 6. | 0. | -3.193407 | 0.974946  | 0.274262  |
| 26. | 6. | 0. | -1.795514 | 1.249133  | 0.217888  |
| 27. | 6. | 0. | -0.899160 | 0.310600  | -0.339914 |
| 28. | 6. | 0. | -1.446753 | -0.885502 | -0.824703 |
| 29. | 8. | 0. | -5.003304 | -0.590147 | -0.165795 |
| 30. | 6. | 0. | -5.886171 | 0.150987  | 0.709458  |
| 31. | 6. | 0. | -5.593961 | 1.655692  | 0.643929  |
| 32. | 6. | 0. | -4.121890 | 1.973216  | 0.775940  |
| 33. | 8. | 0. | -3.749922 | 3.062365  | 1.243343  |
| 34. | 8. | 0. | -1.330500 | 2.411482  | 0.693823  |
| 35. | 6. | 0. | -5.681453 | -0.394250 | 2.138763  |
| 36. | 8. | 0. | -6.642587 | 0.225839  | 2.981440  |
| 37. | 6. | 0. | -7.320190 | -0.150544 | 0.224935  |
| 38. | 6. | 0. | -7.651068 | -1.649239 | -0.031145 |
| 39. | 6. | 0. | -7.484990 | -1.772980 | -1.553186 |
| 40. | 6. | 0. | -7.621906 | -0.353716 | -2.078320 |
| 41. | 8. | 0. | -7.563182 | 0.523176  | -1.025867 |
| 42. | 8. | 0. | -7.764076 | 0.022679  | -3.210091 |
| 43. | 6. | 0. | -9.069306 | -1.990073 | 0.442692  |
| 44. | 1. | 0. | -8.000409 | 0.287220  | 0.959134  |
| 45. | 1. | 0. | -6.935292 | -2.292096 | 0.486280  |
| 46. | 1. | 0. | 0.328927  | 2.591908  | -1.116005 |
| 47. | 1. | 0. | 2.743454  | 3.118675  | -1.239619 |
| 48. | 1. | 0. | 7.125160  | 2.146623  | -0.457664 |
| 49. | 1. | 0. | 8.226125  | 0.795899  | 1.105631  |
| 50. | 1. | 0. | 7.932811  | -1.750951 | -0.540826 |
| 51. | 1. | 0. | 8.466530  | -1.583116 | 1.129036  |
| 52. | 1. | 0. | 1.906537  | -2.128038 | 0.570983  |
| 53. | 1. | 0. | 9.436915  | 0.077227  | -1.608034 |
| 54. | 1. | 0. | 9.749609  | 1.547496  | -0.686159 |
| 55. | 1. | 0. | 10.279770 | -0.017102 | -0.046005 |

|     |    |    |           |           |           |
|-----|----|----|-----------|-----------|-----------|
| 56. | 1. | 0. | 6.713336  | 0.023245  | -2.239275 |
| 57. | 1. | 0. | 6.290833  | 1.592402  | 1.856405  |
| 58. | 1. | 0. | 4.626156  | 0.980407  | 1.893789  |
| 59. | 1. | 0. | 5.647941  | -2.302711 | -1.397048 |
| 60. | 1. | 0. | 5.241218  | -2.831853 | 1.334884  |
| 61. | 1. | 0. | -3.191305 | -2.130144 | -1.137618 |
| 62. | 1. | 0. | -0.773976 | -1.619254 | -1.252406 |
| 63. | 1. | 0. | -5.931820 | 2.047800  | -0.322397 |
| 64. | 1. | 0. | -6.145639 | 2.177621  | 1.428628  |
| 65. | 1. | 0. | -2.120425 | 2.921270  | 1.026690  |
| 66. | 1. | 0. | -4.654405 | -0.171476 | 2.457758  |
| 67. | 1. | 0. | -5.793046 | -1.487074 | 2.126743  |
| 68. | 1. | 0. | -6.404037 | 0.053449  | 3.900361  |
| 69. | 1. | 0. | -6.491689 | -2.135393 | -1.832771 |
| 70. | 1. | 0. | -8.226028 | -2.416933 | -2.033054 |
| 71. | 1. | 0. | -9.316994 | -3.031904 | 0.216277  |
| 72. | 1. | 0. | -9.813043 | -1.353780 | -0.050271 |
| 73. | 1. | 0. | -9.167344 | -1.844888 | 1.523267  |

| 2-2              |                | Standard Orientation<br>(Ångstroms) |          |           |           |
|------------------|----------------|-------------------------------------|----------|-----------|-----------|
| Center<br>number | Atom<br>number | Type                                | X        | Y         | Z         |
| 1.               | 6.             | 0.                                  | 0.565249 | -0.685414 | -0.363868 |
| 2.               | 6.             | 0.                                  | 1.075483 | -1.976467 | -0.576279 |
| 3.               | 6.             | 0.                                  | 2.435270 | -2.275479 | -0.593816 |
| 4.               | 6.             | 0.                                  | 3.356198 | -1.257435 | -0.379800 |
| 5.               | 6.             | 0.                                  | 2.907081 | 0.068771  | -0.135240 |
| 6.               | 6.             | 0.                                  | 1.500503 | 0.344038  | -0.141645 |
| 7.               | 8.             | 0.                                  | 4.667967 | -1.591405 | -0.421098 |
| 8.               | 6.             | 0.                                  | 5.646691 | -0.550715 | -0.436872 |
| 9.               | 6.             | 0.                                  | 5.308882 | 0.676596  | 0.413512  |
| 10.              | 6.             | 0.                                  | 3.850744 | 1.103745  | 0.188069  |
| 11.              | 6.             | 0.                                  | 6.999801 | -1.183460 | -0.030213 |
| 12.              | 6.             | 0.                                  | 8.150110 | -0.151960 | -0.233773 |
| 13.              | 6.             | 0.                                  | 7.769463 | 1.257473  | 0.260940  |
| 14.              | 8.             | 0.                                  | 3.526766 | 2.296074  | 0.392913  |
| 15.              | 8.             | 0.                                  | 1.065914 | 1.591387  | 0.082639  |
| 16.              | 6.             | 0.                                  | 9.455356 | -0.648662 | 0.393940  |
| 17.              | 8.             | 0.                                  | 6.954006 | -1.754286 | 1.260976  |
| 18.              | 6.             | 0.                                  | 5.741912 | 0.129181  | -1.831452 |

|     |    |    |           |           |           |
|-----|----|----|-----------|-----------|-----------|
| 19. | 8. | 0. | 6.181032  | 1.473618  | -1.593766 |
| 20. | 6. | 0. | 6.355862  | 1.665609  | -0.169802 |
| 21. | 8. | 0. | 5.454184  | 0.470124  | 1.816393  |
| 22. | 8. | 0. | 6.161711  | 2.985509  | 0.183771  |
| 23. | 6. | 0. | -2.811821 | 0.950044  | -1.090152 |
| 24. | 6. | 0. | -3.688870 | 0.105471  | -0.421919 |
| 25. | 6. | 0. | -3.198176 | -1.007348 | 0.297714  |
| 26. | 6. | 0. | -1.797092 | -1.270576 | 0.312379  |
| 27. | 6. | 0. | -0.897066 | -0.421053 | -0.368980 |
| 28. | 6. | 0. | -1.444544 | 0.677002  | -1.047092 |
| 29. | 8. | 0. | -5.020150 | 0.401985  | -0.486810 |
| 30. | 6. | 0. | -5.988879 | -0.611365 | -0.126767 |
| 31. | 6. | 0. | -5.551443 | -1.374876 | 1.129666  |
| 32. | 6. | 0. | -4.111414 | -1.830782 | 1.071209  |
| 33. | 8. | 0. | -3.740040 | -2.830864 | 1.707472  |
| 34. | 8. | 0. | -1.329844 | -2.325651 | 0.991455  |
| 35. | 6. | 0. | -6.129926 | -1.560789 | -1.335661 |
| 36. | 8. | 0. | -7.168117 | -2.485436 | -1.043551 |
| 37. | 6. | 0. | -7.317598 | 0.134734  | 0.119573  |
| 38. | 6. | 0. | -7.721466 | 1.177951  | -0.961573 |
| 39. | 6. | 0. | -7.266619 | 2.503710  | -0.333411 |
| 40. | 6. | 0. | -7.174976 | 2.218928  | 1.156252  |
| 41. | 8. | 0. | -7.245316 | 0.864631  | 1.360361  |
| 42. | 8. | 0. | -7.061324 | 2.992459  | 2.067946  |
| 43. | 6. | 0. | -9.230098 | 1.135901  | -1.233802 |
| 44. | 1. | 0. | -8.089602 | -0.628321 | 0.244966  |
| 45. | 1. | 0. | -7.182191 | 0.989875  | -1.892842 |
| 46. | 1. | 0. | 0.369170  | -2.781913 | -0.738463 |
| 47. | 1. | 0. | 2.792052  | -3.281628 | -0.778145 |
| 48. | 1. | 0. | 7.172250  | -2.025510 | -0.712194 |
| 49. | 1. | 0. | 8.309804  | -0.073831 | -1.315953 |
| 50. | 1. | 0. | 7.832933  | 1.317414  | 1.352853  |
| 51. | 1. | 0. | 8.460376  | 2.003584  | -0.142709 |
| 52. | 1. | 0. | 1.860782  | 2.160564  | 0.240895  |
| 53. | 1. | 0. | 9.341025  | -0.791677 | 1.471283  |
| 54. | 1. | 0. | 9.756959  | -1.610094 | -0.034249 |
| 55. | 1. | 0. | 10.264130 | 0.068231  | 0.219547  |
| 56. | 1. | 0. | 6.593221  | -1.085900 | 1.864049  |
| 57. | 1. | 0. | 6.444527  | -0.396082 | -2.487228 |
| 58. | 1. | 0. | 4.762040  | 0.142345  | -2.322153 |
| 59. | 1. | 0. | 5.471809  | 1.348451  | 2.228180  |
| 60. | 1. | 0. | 5.208360  | 3.174623  | 0.102104  |
| 61. | 1. | 0. | -3.199184 | 1.798448  | -1.641936 |

|     |    |    |           |           |           |
|-----|----|----|-----------|-----------|-----------|
| 62. | 1. | 0. | -0.768979 | 1.344428  | -1.569064 |
| 63. | 1. | 0. | -5.655147 | -0.721928 | 2.004004  |
| 64. | 1. | 0. | -6.196921 | -2.242398 | 1.281761  |
| 65. | 1. | 0. | -2.117526 | -2.764871 | 1.417292  |
| 66. | 1. | 0. | -5.168515 | -2.065490 | -1.501380 |
| 67. | 1. | 0. | -6.350957 | -0.969193 | -2.234725 |
| 68. | 1. | 0. | -7.147171 | -3.190696 | -1.701731 |
| 69. | 1. | 0. | -6.271779 | 2.803404  | -0.674886 |
| 70. | 1. | 0. | -7.949045 | 3.339048  | -0.508379 |
| 71. | 1. | 0. | -9.517791 | 1.905230  | -1.957193 |
| 72. | 1. | 0. | -9.800973 | 1.309504  | -0.314560 |
| 73. | 1. | 0. | -9.529667 | 0.162594  | -1.635574 |

| 2-3              |                | Standard Orientation<br>(Ångstroms) |           |           |           |
|------------------|----------------|-------------------------------------|-----------|-----------|-----------|
| Center<br>number | Atom<br>number | Type                                | X         | Y         | Z         |
| 1.               | 6.             | 0.                                  | 0.292763  | 0.238269  | 0.073412  |
| 2.               | 6.             | 0.                                  | 0.628580  | 1.481742  | 0.632151  |
| 3.               | 6.             | 0.                                  | 1.939879  | 1.916075  | 0.810492  |
| 4.               | 6.             | 0.                                  | 2.986412  | 1.090367  | 0.420206  |
| 5.               | 6.             | 0.                                  | 2.715497  | -0.175023 | -0.169119 |
| 6.               | 6.             | 0.                                  | 1.353932  | -0.594255 | -0.328176 |
| 7.               | 8.             | 0.                                  | 4.245570  | 1.546523  | 0.626811  |
| 8.               | 6.             | 0.                                  | 5.336677  | 0.634084  | 0.500104  |
| 9.               | 6.             | 0.                                  | 5.202312  | -0.392406 | -0.628614 |
| 10.              | 6.             | 0.                                  | 3.792456  | -1.001670 | -0.638877 |
| 11.              | 6.             | 0.                                  | 6.629677  | 1.473958  | 0.367063  |
| 12.              | 6.             | 0.                                  | 7.876251  | 0.542740  | 0.445159  |
| 13.              | 6.             | 0.                                  | 7.698838  | -0.747294 | -0.380864 |
| 14.              | 8.             | 0.                                  | 3.625727  | -2.138389 | -1.139144 |
| 15.              | 8.             | 0.                                  | 1.083702  | -1.790200 | -0.870071 |
| 16.              | 6.             | 0.                                  | 9.154212  | 1.296567  | 0.067152  |
| 17.              | 8.             | 0.                                  | 6.604907  | 2.314219  | -0.768475 |
| 18.              | 6.             | 0.                                  | 5.419158  | -0.336143 | 1.712568  |
| 19.              | 8.             | 0.                                  | 6.025716  | -1.540817 | 1.223297  |
| 20.              | 6.             | 0.                                  | 6.316302  | -1.380505 | -0.184341 |
| 21.              | 8.             | 0.                                  | 5.418284  | 0.141879  | -1.933404 |
| 22.              | 8.             | 0.                                  | 6.301694  | -2.595490 | -0.840085 |
| 23.              | 6.             | 0.                                  | -2.937892 | -1.098652 | -1.466707 |
| 24.              | 6.             | 0.                                  | -3.835778 | -0.947537 | -0.416825 |

|     |    |    |           |           |           |
|-----|----|----|-----------|-----------|-----------|
| 25. | 6. | 0. | -3.402982 | -0.433957 | 0.824067  |
| 26. | 6. | 0. | -2.045008 | -0.037434 | 0.982513  |
| 27. | 6. | 0. | -1.124849 | -0.179086 | -0.080587 |
| 28. | 6. | 0. | -1.607644 | -0.719698 | -1.278446 |
| 29. | 8. | 0. | -5.128809 | -1.326829 | -0.648297 |
| 30. | 6. | 0. | -6.180222 | -0.962968 | 0.277061  |
| 31. | 6. | 0. | -5.688278 | -0.994488 | 1.732569  |
| 32. | 6. | 0. | -4.327260 | -0.364493 | 1.941375  |
| 33. | 8. | 0. | -4.012750 | 0.088590  | 3.051257  |
| 34. | 8. | 0. | -1.629770 | 0.457342  | 2.154659  |
| 35. | 6. | 0. | -7.235154 | -2.058492 | 0.043854  |
| 36. | 8. | 0. | -8.336979 | -1.794325 | 0.898416  |
| 37. | 6. | 0. | -6.778067 | 0.415032  | -0.091030 |
| 38. | 6. | 0. | -7.002113 | 0.677273  | -1.608537 |
| 39. | 6. | 0. | -5.833755 | 1.606551  | -1.971316 |
| 40. | 6. | 0. | -5.369210 | 2.194890  | -0.649398 |
| 41. | 8. | 0. | -5.922835 | 1.477605  | 0.379761  |
| 42. | 8. | 0. | -4.632448 | 3.122639  | -0.453193 |
| 43. | 6. | 0. | -8.370998 | 1.319527  | -1.865207 |
| 44. | 1. | 0. | -7.715421 | 0.500592  | 0.465698  |
| 45. | 1. | 0. | -6.931007 | -0.259805 | -2.165578 |
| 46. | 1. | 0. | -0.178994 | 2.129889  | 0.952207  |
| 47. | 1. | 0. | 2.162311  | 2.878329  | 1.255648  |
| 48. | 1. | 0. | 6.656174  | 2.152651  | 1.228718  |
| 49. | 1. | 0. | 7.969271  | 0.235030  | 1.493537  |
| 50. | 1. | 0. | 7.845186  | -0.549770 | -1.448316 |
| 51. | 1. | 0. | 8.442815  | -1.493858 | -0.087291 |
| 52. | 1. | 0. | 1.948986  | -2.224051 | -1.078578 |
| 53. | 1. | 0. | 9.099564  | 1.667912  | -0.959119 |
| 54. | 1. | 0. | 9.308099  | 2.161246  | 0.720812  |
| 55. | 1. | 0. | 10.028280 | 0.643624  | 0.157572  |
| 56. | 1. | 0. | 6.365841  | 1.765220  | -1.531459 |
| 57. | 1. | 0. | 6.012400  | 0.089960  | 2.528713  |
| 58. | 1. | 0. | 4.418284  | -0.558700 | 2.098843  |
| 59. | 1. | 0. | 5.573982  | -0.614822 | -2.520296 |
| 60. | 1. | 0. | 5.373056  | -2.889952 | -0.890231 |
| 61. | 1. | 0. | -3.281561 | -1.502266 | -2.412089 |
| 62. | 1. | 0. | -0.913110 | -0.842941 | -2.101393 |
| 63. | 1. | 0. | -6.410802 | -0.520994 | 2.398685  |
| 64. | 1. | 0. | -5.595356 | -2.040542 | 2.054552  |
| 65. | 1. | 0. | -2.420289 | 0.463578  | 2.760684  |
| 66. | 1. | 0. | -6.761994 | -3.026232 | 0.260954  |
| 67. | 1. | 0. | -7.528964 | -2.063827 | -1.015416 |

|     |    |    |           |           |           |
|-----|----|----|-----------|-----------|-----------|
| 68. | 1. | 0. | -8.973927 | -2.513556 | 0.808397  |
| 69. | 1. | 0. | -4.986563 | 1.066584  | -2.406625 |
| 70. | 1. | 0. | -6.101189 | 2.410997  | -2.660563 |
| 71. | 1. | 0. | -8.507559 | 1.537577  | -2.929084 |
| 72. | 1. | 0. | -8.473191 | 2.261132  | -1.313824 |
| 73. | 1. | 0. | -9.182825 | 0.657168  | -1.547616 |

| 2-4              |                | Standard Orientation<br>(Ångstroms) |           |           |           |
|------------------|----------------|-------------------------------------|-----------|-----------|-----------|
| Center<br>number | Atom<br>number | Type                                | X         | Y         | Z         |
| 1.               | 6.             | 0.                                  | -0.586444 | 0.662037  | 0.329016  |
| 2.               | 6.             | 0.                                  | -1.081517 | 1.949009  | 0.592576  |
| 3.               | 6.             | 0.                                  | -2.438839 | 2.258772  | 0.632776  |
| 4.               | 6.             | 0.                                  | -3.370713 | 1.253354  | 0.406358  |
| 5.               | 6.             | 0.                                  | -2.936414 | -0.074270 | 0.142330  |
| 6.               | 6.             | 0.                                  | -1.531683 | -0.353941 | 0.094103  |
| 7.               | 8.             | 0.                                  | -4.679406 | 1.600642  | 0.450522  |
| 8.               | 6.             | 0.                                  | -5.656464 | 0.673856  | -0.026636 |
| 9.               | 6.             | 0.                                  | -5.363886 | -0.798914 | 0.276483  |
| 10.              | 6.             | 0.                                  | -3.895341 | -1.131301 | -0.023635 |
| 11.              | 6.             | 0.                                  | -7.029207 | 1.118082  | 0.532758  |
| 12.              | 6.             | 0.                                  | -8.166003 | 0.278703  | -0.124408 |
| 13.              | 6.             | 0.                                  | -7.811897 | -1.218414 | -0.218516 |
| 14.              | 8.             | 0.                                  | -3.582054 | -2.313399 | -0.295629 |
| 15.              | 8.             | 0.                                  | -1.108454 | -1.598155 | -0.169552 |
| 16.              | 6.             | 0.                                  | -9.503288 | 0.508929  | 0.585125  |
| 17.              | 8.             | 0.                                  | -7.052534 | 1.120933  | 1.945317  |
| 18.              | 6.             | 0.                                  | -5.674804 | 0.609632  | -1.579813 |
| 19.              | 8.             | 0.                                  | -6.127205 | -0.707793 | -1.923047 |
| 20.              | 6.             | 0.                                  | -6.376765 | -1.449241 | -0.706456 |
| 21.              | 8.             | 0.                                  | -5.587094 | -1.171586 | 1.634954  |
| 22.              | 8.             | 0.                                  | -6.200715 | -2.804675 | -0.901021 |
| 23.              | 6.             | 0.                                  | 2.783047  | -1.007774 | 0.995554  |
| 24.              | 6.             | 0.                                  | 3.654678  | -0.187654 | 0.289726  |
| 25.              | 6.             | 0.                                  | 3.165545  | 0.938673  | -0.410623 |
| 26.              | 6.             | 0.                                  | 1.766355  | 1.213595  | -0.405937 |
| 27.              | 6.             | 0.                                  | 0.873043  | 0.383381  | 0.304106  |
| 28.              | 6.             | 0.                                  | 1.421244  | -0.708613 | 0.991253  |
| 29.              | 8.             | 0.                                  | 4.977987  | -0.512015 | 0.315563  |
| 30.              | 6.             | 0.                                  | 5.867768  | 0.060879  | -0.668133 |
| 31.              | 6.             | 0.                                  | 5.565057  | 1.547756  | -0.898224 |



|     |    |    |            |           |           |
|-----|----|----|------------|-----------|-----------|
| 32. | 6. | 0. | 4.090901   | 1.831804  | -1.083989 |
| 33. | 8. | 0. | 3.717880   | 2.819028  | -1.739288 |
| 34. | 8. | 0. | 1.296013   | 2.273231  | -1.076957 |
| 35. | 6. | 0. | 5.691279   | -0.758448 | -1.962227 |
| 36. | 8. | 0. | 6.682506   | -0.336870 | -2.889814 |
| 37. | 6. | 0. | 7.290203   | -0.117763 | -0.094881 |
| 38. | 6. | 0. | 7.679327   | -1.569202 | 0.309045  |
| 39. | 6. | 0. | 8.331466   | -1.382547 | 1.687654  |
| 40. | 6. | 0. | 7.909962   | 0.000209  | 2.153419  |
| 41. | 8. | 0. | 7.386714   | 0.689341  | 1.095843  |
| 42. | 8. | 0. | 8.020913   | 0.493134  | 3.243500  |
| 43. | 6. | 0. | 8.581420   | -2.261416 | -0.717032 |
| 44. | 1. | 0. | 7.995592   | 0.285100  | -0.829146 |
| 45. | 1. | 0. | 6.757829   | -2.145161 | 0.436167  |
| 46. | 1. | 0. | -0.364795  | 2.744182  | 0.762003  |
| 47. | 1. | 0. | -2.784730  | 3.266042  | 0.831149  |
| 48. | 1. | 0. | -7.165874  | 2.166439  | 0.239482  |
| 49. | 1. | 0. | -8.267631  | 0.644788  | -1.153122 |
| 50. | 1. | 0. | -7.934298  | -1.709263 | 0.753154  |
| 51. | 1. | 0. | -8.479776  | -1.725358 | -0.921315 |
| 52. | 1. | 0. | -1.911249  | -2.161102 | -0.308840 |
| 53. | 1. | 0. | -9.446208  | 0.205332  | 1.633325  |
| 54. | 1. | 0. | -9.782334  | 1.567396  | 0.565104  |
| 55. | 1. | 0. | -10.301170 | -0.060884 | 0.098095  |
| 56. | 1. | 0. | -6.727898  | 0.257190  | 2.243892  |
| 57. | 1. | 0. | -6.339636  | 1.368509  | -2.005804 |
| 58. | 1. | 0. | -4.669087  | 0.770731  | -1.984219 |
| 59. | 1. | 0. | -5.637057  | -2.140377 | 1.652535  |
| 60. | 1. | 0. | -5.244309  | -2.964337 | -1.006172 |
| 61. | 1. | 0. | 3.171256   | -1.866334 | 1.530556  |
| 62. | 1. | 0. | 0.747402   | -1.359654 | 1.536302  |
| 63. | 1. | 0. | 5.901326   | 2.124683  | -0.028908 |
| 64. | 1. | 0. | 6.112373   | 1.906930  | -1.772681 |
| 65. | 1. | 0. | 2.082773   | 2.719251  | -1.495691 |
| 66. | 1. | 0. | 4.676813   | -0.595127 | -2.349329 |
| 67. | 1. | 0. | 5.785119   | -1.825513 | -1.719614 |
| 68. | 1. | 0. | 6.451366   | -0.675922 | -3.763269 |
| 69. | 1. | 0. | 8.045373   | -2.130339 | 2.430061  |
| 70. | 1. | 0. | 9.427021   | -1.388891 | 1.626705  |
| 71. | 1. | 0. | 8.796657   | -3.290760 | -0.413683 |
| 72. | 1. | 0. | 9.536884   | -1.732721 | -0.810864 |
| 73. | 1. | 0. | 8.123683   | -2.284426 | -1.709635 |

**Table S6.** Gibbs free energies<sup>a</sup> and equilibrium populations<sup>b</sup> of low-energy conformers of phomoxanthone N (**3**)

| Conformers of <b>3</b>                                                                            | In MeOH           |            |
|---------------------------------------------------------------------------------------------------|-------------------|------------|
|                                                                                                   | $\Delta G^a$      | $P (\%)^b$ |
| 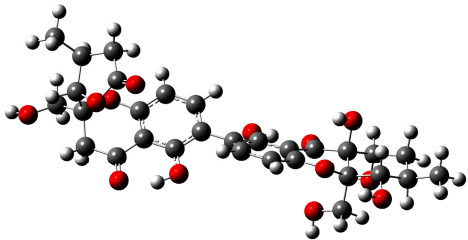<br><b>3-1</b>   | -1342811.87691144 | 97.88      |
| <br><b>3-2</b>   | -1342809.50304111 | 1.77       |
| <br><b>3-3</b> | -1342808.5423233  | 0.35       |

<sup>a</sup> $\Delta G$ , B3LYP/ 6-31g (d, p), in kcal/mol. <sup>b</sup> Boltzmann-population.

**Table S7.** Cartesian coordinates for the low-energy reoptimized MMFF conformers of phomoxanthone N (**3**) at B3LYP/6-31G(d,p) level of theory in gas

| Conformer <b>3-1</b> |      | Standard Orientation<br>(Ångstroms) |          |           |           |
|----------------------|------|-------------------------------------|----------|-----------|-----------|
| Center Number        | Atom | Type                                | X        | Y         | Z         |
| 1.                   | 6.   | 0.                                  | 0.565724 | 0.411220  | -0.519732 |
| 2.                   | 6.   | 0.                                  | 1.076182 | 1.544075  | -1.168848 |
| 3.                   | 6.   | 0.                                  | 2.440890 | 1.806387  | -1.297138 |
| 4.                   | 6.   | 0.                                  | 3.352767 | 0.900896  | -0.773596 |
| 5.                   | 6.   | 0.                                  | 2.898641 | -0.280501 | -0.140435 |

|     |    |    |           |           |           |
|-----|----|----|-----------|-----------|-----------|
| 6.  | 6. | 0. | 1.503537  | -0.499311 | 0.016481  |
| 7.  | 8. | 0. | 4.687421  | 1.178719  | -0.933378 |
| 8.  | 6. | 0. | 5.659299  | 0.473273  | -0.091744 |
| 9.  | 6. | 0. | 5.296101  | -1.025972 | -0.127207 |
| 10. | 6. | 0. | 3.865394  | -1.228524 | 0.386320  |
| 11. | 6. | 0. | 7.024749  | 0.680160  | -0.789304 |
| 12. | 6. | 0. | 8.137905  | -0.149589 | -0.122410 |
| 13. | 6. | 0. | 7.735579  | -1.636712 | -0.021179 |
| 14. | 6. | 0. | 6.348871  | -1.908005 | 0.571383  |
| 15. | 8. | 0. | 3.567773  | -2.205543 | 1.092818  |
| 16. | 8. | 0. | 1.071138  | -1.588462 | 0.673788  |
| 17. | 8. | 0. | 6.375539  | -1.683838 | 1.974763  |
| 18. | 6. | 0. | 9.461776  | 0.009307  | -0.880941 |
| 19. | 8. | 0. | 7.404988  | 2.051753  | -0.769549 |
| 20. | 6. | 0. | 5.677517  | 1.123734  | 1.298500  |
| 21. | 8. | 0. | 4.471348  | 0.839140  | 1.998249  |
| 22. | 8. | 0. | 5.274856  | -1.498749 | -1.484963 |
| 23. | 6. | 0. | -2.827046 | -1.344324 | -0.534050 |
| 24. | 6. | 0. | -3.685665 | -0.317809 | -0.164797 |
| 25. | 6. | 0. | -3.181437 | 0.978653  | 0.085610  |
| 26. | 6. | 0. | -1.779484 | 1.218465  | -0.020139 |
| 27. | 6. | 0. | -0.896791 | 0.180511  | -0.393402 |
| 28. | 6. | 0. | -1.461985 | -1.077726 | -0.643691 |
| 29. | 8. | 0. | -5.015932 | -0.613614 | -0.068701 |
| 30. | 6. | 0. | -5.888022 | 0.284509  | 0.656253  |
| 31. | 6. | 0. | -5.571620 | 1.749352  | 0.327866  |
| 32. | 6. | 0. | -4.094475 | 2.063536  | 0.398324  |
| 33. | 8. | 0. | -3.707919 | 3.215051  | 0.659709  |
| 34. | 8. | 0. | -1.298800 | 2.442851  | 0.231794  |
| 35. | 6. | 0. | -5.697200 | -0.003309 | 2.160920  |
| 36. | 8. | 0. | -6.645347 | 0.776436  | 2.876666  |
| 37. | 6. | 0. | -7.325181 | -0.076025 | 0.224839  |
| 38. | 6. | 0. | -7.675542 | -1.591573 | 0.233468  |
| 39. | 6. | 0. | -7.515015 | -1.982099 | -1.243497 |
| 40. | 6. | 0. | -7.626279 | -0.674178 | -2.008960 |
| 41. | 8. | 0. | -7.554675 | 0.372091  | -1.126174 |
| 42. | 8. | 0. | -7.760383 | -0.499622 | -3.189922 |
| 43. | 6. | 0. | -9.096364 | -1.828642 | 0.759834  |
| 44. | 1. | 0. | -8.001619 | 0.492667  | 0.867170  |
| 45. | 1. | 0. | 0.372230  | 2.261999  | -1.572308 |
| 46. | 1. | 0. | 2.797914  | 2.707144  | -1.782584 |
| 47. | 1. | 0. | 6.909430  | 0.335407  | -1.826314 |
| 48. | 1. | 0. | 8.285128  | 0.247143  | 0.889168  |

|     |    |    |           |           |           |
|-----|----|----|-----------|-----------|-----------|
| 49. | 1. | 0. | 7.756093  | -2.077829 | -1.023220 |
| 50. | 1. | 0. | 8.473253  | -2.173423 | 0.584421  |
| 51. | 1. | 0. | 6.070307  | -2.948359 | 0.358419  |
| 52. | 1. | 0. | 1.872143  | -2.059578 | 1.017059  |
| 53. | 1. | 0. | 5.507333  | -1.960904 | 2.304960  |
| 54. | 1. | 0. | 9.376204  | -0.378591 | -1.903203 |
| 55. | 1. | 0. | 10.261960 | -0.545342 | -0.380219 |
| 56. | 1. | 0. | 9.753194  | 1.060082  | -0.939534 |
| 57. | 1. | 0. | 6.720671  | 2.539761  | -1.248535 |
| 58. | 1. | 0. | 5.806720  | 2.201995  | 1.148575  |
| 59. | 1. | 0. | 6.538840  | 0.737817  | 1.847601  |
| 60. | 1. | 0. | 4.587448  | 1.121329  | 2.913747  |
| 61. | 1. | 0. | 4.796593  | -0.851181 | -2.022951 |
| 62. | 1. | 0. | -3.224197 | -2.334904 | -0.722199 |
| 63. | 1. | 0. | -0.798767 | -1.888405 | -0.921498 |
| 64. | 1. | 0. | -6.111486 | 2.409405  | 1.010033  |
| 65. | 1. | 0. | -5.908178 | 1.971561  | -0.691350 |
| 66. | 1. | 0. | -2.080594 | 3.014576  | 0.467779  |
| 67. | 1. | 0. | -4.665869 | 0.249123  | 2.441587  |
| 68. | 1. | 0. | -5.833405 | -1.078251 | 2.342097  |
| 69. | 1. | 0. | -6.412120 | 0.761777  | 3.812837  |
| 70. | 1. | 0. | -6.965777 | -2.143148 | 0.854201  |
| 71. | 1. | 0. | -6.529899 | -2.407533 | -1.455137 |
| 72. | 1. | 0. | -8.269828 | -2.685299 | -1.604089 |
| 73. | 1. | 0. | -9.355547 | -2.891248 | 0.718631  |
| 74. | 1. | 0. | -9.834119 | -1.280142 | 0.163163  |
| 75. | 1. | 0. | -9.191054 | -1.496013 | 1.798538  |

| Conformer <b>3-2</b> |      | Standard Orientation<br>(Ångstroms) |          |           |           |
|----------------------|------|-------------------------------------|----------|-----------|-----------|
| Center<br>Number     | Atom | Type                                | X        | Y         | Z         |
| 1.                   | 6.   | 0.                                  | 0.352273 | 0.191645  | 0.093632  |
| 2.                   | 6.   | 0.                                  | 0.730139 | 1.472471  | 0.526003  |
| 3.                   | 6.   | 0.                                  | 2.056414 | 1.885937  | 0.639821  |
| 4.                   | 6.   | 0.                                  | 3.073995 | 1.003035  | 0.299752  |
| 5.                   | 6.   | 0.                                  | 2.752193 | -0.290037 | -0.180277 |
| 6.                   | 6.   | 0.                                  | 1.391084 | -0.698473 | -0.249477 |
| 7.                   | 8.   | 0.                                  | 4.355637 | 1.436858  | 0.447091  |
| 8.                   | 6.   | 0.                                  | 5.450596 | 0.481751  | 0.357144  |
| 9.                   | 6.   | 0.                                  | 5.172280 | -0.497209 | -0.798033 |
| 10.                  | 6.   | 0.                                  | 3.813296 | -1.176250 | -0.598176 |
| 11.                  | 6.   | 0.                                  | 6.702443 | 1.323573  | 0.011176  |

|     |    |    |           |           |           |
|-----|----|----|-----------|-----------|-----------|
| 12. | 6. | 0. | 7.937510  | 0.436390  | -0.234771 |
| 13. | 6. | 0. | 7.637617  | -0.665562 | -1.274002 |
| 14. | 6. | 0. | 6.349771  | -1.465765 | -1.041593 |
| 15. | 8. | 0. | 3.653456  | -2.366534 | -0.931025 |
| 16. | 8. | 0. | 1.092284  | -1.944944 | -0.659705 |
| 17. | 8. | 0. | 6.542386  | -2.380217 | 0.026637  |
| 18. | 6. | 0. | 9.137812  | 1.286032  | -0.671617 |
| 19. | 8. | 0. | 7.003788  | 2.233665  | 1.064521  |
| 20. | 6. | 0. | 5.622042  | -0.173272 | 1.737895  |
| 21. | 8. | 0. | 4.532397  | -1.051183 | 2.001472  |
| 22. | 8. | 0. | 5.009692  | 0.315201  | -1.977206 |
| 23. | 6. | 0. | -2.911700 | -1.271926 | -1.248239 |
| 24. | 6. | 0. | -3.806369 | -0.956023 | -0.235611 |
| 25. | 6. | 0. | -3.364010 | -0.280725 | 0.921236  |
| 26. | 6. | 0. | -1.997198 | 0.104941  | 1.028986  |
| 27. | 6. | 0. | -1.076485 | -0.206296 | 0.002508  |
| 28. | 6. | 0. | -1.574201 | -0.897655 | -1.109709 |
| 29. | 8. | 0. | -5.105542 | -1.350167 | -0.413023 |
| 30. | 6. | 0. | -6.158006 | -0.841864 | 0.433706  |
| 31. | 6. | 0. | -5.673012 | -0.631118 | 1.877923  |
| 32. | 6. | 0. | -4.294144 | -0.012850 | 1.999233  |
| 33. | 8. | 0. | -3.982768 | 0.602051  | 3.030633  |
| 34. | 8. | 0. | -1.578226 | 0.754531  | 2.123216  |
| 35. | 6. | 0. | -7.206236 | -1.964633 | 0.373715  |
| 36. | 8. | 0. | -8.360122 | -1.534323 | 1.081420  |
| 37. | 6. | 0. | -6.734927 | 0.465680  | -0.161709 |
| 38. | 6. | 0. | -7.127884 | 0.420139  | -1.664223 |
| 39. | 6. | 0. | -6.605732 | 1.763665  | -2.196180 |
| 40. | 6. | 0. | -5.603057 | 2.247887  | -1.162828 |
| 41. | 8. | 0. | -5.736616 | 1.498863  | -0.025722 |
| 42. | 8. | 0. | -4.813408 | 3.149096  | -1.245185 |
| 43. | 6. | 0. | -8.626791 | 0.207596  | -1.899182 |
| 44. | 1. | 0. | -7.594884 | 0.751777  | 0.454295  |
| 45. | 1. | 0. | -0.053258 | 2.167761  | 0.803080  |
| 46. | 1. | 0. | 2.307366  | 2.875994  | 1.002057  |
| 47. | 1. | 0. | 6.467469  | 1.873317  | -0.909276 |
| 48. | 1. | 0. | 8.197610  | -0.038617 | 0.718414  |
| 49. | 1. | 0. | 7.563516  | -0.200613 | -2.262902 |
| 50. | 1. | 0. | 8.473677  | -1.371671 | -1.311333 |
| 51. | 1. | 0. | 6.111584  | -2.022646 | -1.962156 |
| 52. | 1. | 0. | 1.948454  | -2.417253 | -0.809537 |
| 53. | 1. | 0. | 5.713938  | -2.875441 | 0.114452  |
| 54. | 1. | 0. | 8.938046  | 1.783102  | -1.628568 |

|     |    |    |           |           |           |
|-----|----|----|-----------|-----------|-----------|
| 55. | 1. | 0. | 10.028670 | 0.662203  | -0.798562 |
| 56. | 1. | 0. | 9.356715  | 2.055894  | 0.071188  |
| 57. | 1. | 0. | 6.239153  | 2.820564  | 1.148288  |
| 58. | 1. | 0. | 5.664932  | 0.642965  | 2.467802  |
| 59. | 1. | 0. | 6.566673  | -0.720801 | 1.762069  |
| 60. | 1. | 0. | 4.678983  | -1.455308 | 2.865575  |
| 61. | 1. | 0. | 4.785666  | -0.280103 | -2.707169 |
| 62. | 1. | 0. | -3.263243 | -1.791839 | -2.131823 |
| 63. | 1. | 0. | -0.882633 | -1.149995 | -1.904648 |
| 64. | 1. | 0. | -5.611826 | -1.606760 | 2.378842  |
| 65. | 1. | 0. | -6.386380 | -0.030948 | 2.445342  |
| 66. | 1. | 0. | -2.373531 | 0.871332  | 2.710016  |
| 67. | 1. | 0. | -6.759424 | -2.863817 | 0.819315  |
| 68. | 1. | 0. | -7.427792 | -2.191442 | -0.678163 |
| 69. | 1. | 0. | -8.973267 | -2.276654 | 1.146529  |
| 70. | 1. | 0. | -6.560129 | -0.388924 | -2.135179 |
| 71. | 1. | 0. | -6.132982 | 1.711313  | -3.179047 |
| 72. | 1. | 0. | -7.402806 | 2.515126  | -2.259254 |
| 73. | 1. | 0. | -8.846010 | 0.136780  | -2.969152 |
| 74. | 1. | 0. | -9.203866 | 1.046265  | -1.493440 |
| 75. | 1. | 0. | -8.992371 | -0.701225 | -1.414654 |

| Conformer <b>3-3</b> |      | Standard Orientation<br>(Ångstroms) |          |           |           |
|----------------------|------|-------------------------------------|----------|-----------|-----------|
| Center<br>Number     | Atom | Type                                | X        | Y         | Z         |
| 1.                   | 6.   | 0.                                  | 0.292380 | 0.158100  | 0.088925  |
| 2.                   | 6.   | 0.                                  | 0.654963 | 1.451337  | 0.491849  |
| 3.                   | 6.   | 0.                                  | 1.978682 | 1.882705  | 0.589648  |
| 4.                   | 6.   | 0.                                  | 3.000327 | 1.004707  | 0.256914  |
| 5.                   | 6.   | 0.                                  | 2.695409 | -0.302244 | -0.193237 |
| 6.                   | 6.   | 0.                                  | 1.341157 | -0.730726 | -0.235903 |
| 7.                   | 8.   | 0.                                  | 4.289532 | 1.468441  | 0.342219  |
| 8.                   | 6.   | 0.                                  | 5.389940 | 0.499980  | 0.347978  |
| 9.                   | 6.   | 0.                                  | 5.123521 | -0.510049 | -0.787697 |
| 10.                  | 6.   | 0.                                  | 3.773470 | -1.201772 | -0.564148 |
| 11.                  | 6.   | 0.                                  | 6.655341 | 1.322584  | 0.007418  |
| 12.                  | 6.   | 0.                                  | 7.885855 | 0.418360  | -0.194372 |
| 13.                  | 6.   | 0.                                  | 7.594823 | -0.688883 | -1.229865 |
| 14.                  | 6.   | 0.                                  | 6.300706 | -1.478809 | -1.008554 |
| 15.                  | 8.   | 0.                                  | 3.620661 | -2.409321 | -0.811676 |

|     |    |    |           |           |           |
|-----|----|----|-----------|-----------|-----------|
| 16. | 8. | 0. | 1.055329  | -1.992078 | -0.601509 |
| 17. | 8. | 0. | 6.463532  | -2.368204 | 0.088188  |
| 18. | 6. | 0. | 9.106905  | 1.248952  | -0.609616 |
| 19. | 8. | 0. | 6.944216  | 2.264209  | 1.035208  |
| 20. | 6. | 0. | 5.516684  | -0.095515 | 1.757290  |
| 21. | 8. | 0. | 4.401799  | -0.931687 | 2.045299  |
| 22. | 8. | 0. | 4.987505  | 0.178315  | -2.042895 |
| 23. | 6. | 0. | -2.950879 | -1.373490 | -1.222807 |
| 24. | 6. | 0. | -3.856480 | -1.025592 | -0.229139 |
| 25. | 6. | 0. | -3.426242 | -0.312662 | 0.910186  |
| 26. | 6. | 0. | -2.060784 | 0.078490  | 1.018178  |
| 27. | 6. | 0. | -1.131666 | -0.257471 | 0.006268  |
| 28. | 6. | 0. | -1.615865 | -0.988911 | -1.085879 |
| 29. | 8. | 0. | -5.155546 | -1.415531 | -0.409002 |
| 30. | 6. | 0. | -6.209596 | -0.844177 | 0.400003  |
| 31. | 6. | 0. | -5.748687 | -0.625489 | 1.849347  |
| 32. | 6. | 0. | -4.365552 | -0.020837 | 1.977519  |
| 33. | 8. | 0. | -4.053967 | 0.606828  | 3.000261  |
| 34. | 8. | 0. | -1.651904 | 0.757755  | 2.096521  |
| 35. | 6. | 0. | -7.306028 | -1.922011 | 0.342027  |
| 36. | 8. | 0. | -8.413237 | -1.463280 | 1.102463  |
| 37. | 6. | 0. | -6.741879 | 0.462266  | -0.234493 |
| 38. | 6. | 0. | -6.904995 | 0.446126  | -1.782189 |
| 39. | 6. | 0. | -5.694475 | 1.261846  | -2.261652 |
| 40. | 6. | 0. | -5.257760 | 2.072073  | -1.052347 |
| 41. | 8. | 0. | -5.866121 | 1.568383  | 0.068170  |
| 42. | 8. | 0. | -4.501260 | 3.003373  | -1.000701 |
| 43. | 6. | 0. | -8.242641 | 1.062772  | -2.208982 |
| 44. | 1. | 0. | -7.693528 | 0.675871  | 0.260208  |
| 45. | 1. | 0. | -0.135048 | 2.143192  | 0.758095  |
| 46. | 1. | 0. | 2.220392  | 2.882751  | 0.930232  |
| 47. | 1. | 0. | 6.450717  | 1.846378  | -0.936726 |
| 48. | 1. | 0. | 8.114954  | -0.049774 | 0.770322  |
| 49. | 1. | 0. | 7.535685  | -0.235232 | -2.224730 |
| 50. | 1. | 0. | 8.427178  | -1.400191 | -1.246505 |
| 51. | 1. | 0. | 6.069134  | -2.041705 | -1.922241 |
| 52. | 1. | 0. | 1.917391  | -2.462754 | -0.727702 |
| 53. | 1. | 0. | 5.655448  | -2.902901 | 0.118825  |
| 54. | 1. | 0. | 8.936234  | 1.739157  | -1.575705 |
| 55. | 1. | 0. | 9.990810  | 0.610981  | -0.711182 |
| 56. | 1. | 0. | 9.320790  | 2.022573  | 0.130748  |
| 57. | 1. | 0. | 6.177474  | 2.850625  | 1.100334  |
| 58. | 1. | 0. | 5.576133  | 0.746178  | 2.457204  |

|     |    |    |           |           |           |
|-----|----|----|-----------|-----------|-----------|
| 59. | 1. | 0. | 6.446816  | -0.665778 | 1.810050  |
| 60. | 1. | 0. | 4.578593  | -1.383765 | 2.879371  |
| 61. | 1. | 0. | 4.395037  | 0.932733  | -1.911757 |
| 62. | 1. | 0. | -3.291945 | -1.929964 | -2.088192 |
| 63. | 1. | 0. | -0.916770 | -1.264956 | -1.866157 |
| 64. | 1. | 0. | -5.708209 | -1.597333 | 2.359661  |
| 65. | 1. | 0. | -6.462258 | -0.009040 | 2.397931  |
| 66. | 1. | 0. | -2.450599 | 0.880565  | 2.679016  |
| 67. | 1. | 0. | -6.879888 | -2.850815 | 0.745931  |
| 68. | 1. | 0. | -7.578105 | -2.110665 | -0.706322 |
| 69. | 1. | 0. | -9.080887 | -2.159637 | 1.120959  |
| 70. | 1. | 0. | -6.843462 | -0.579540 | -2.152739 |
| 71. | 1. | 0. | -4.850456 | 0.628158  | -2.552931 |
| 72. | 1. | 0. | -5.909875 | 1.931185  | -3.097907 |
| 73. | 1. | 0. | -8.334920 | 1.080017  | -3.299545 |
| 74. | 1. | 0. | -8.334861 | 2.093709  | -1.848475 |
| 75. | 1. | 0. | -9.086102 | 0.492369  | -1.806469 |
